# Supplementary material for: Divergent synthesis of polythioindoles using elemental sulfur as the polysulfur source under metal-free conditions
Source: Royal Society of Chemistry journal article supplement (doi:10.1039/d4qo00632a), 2024-01-01

## Supporting Information

### Divergent synthesis of polythioindoles using elemental sulfur as the polysulfur source under metal-free conditions

Penghui Ni,<sup>a\*</sup> Jing Tan,<sup>a</sup> Yuxing Tan,<sup>a</sup> Wujiu Jiang,<sup>a</sup> and Guo-Jun Deng<sup>b\*</sup>

<sup>a</sup> Key Laboratory of Functional Metal Organic Compounds of Hunan Province, Hunan Province Universities Key Laboratory of Functional Organometallic Materials, College of Chemistry and Material Science, Hengyang Normal University, Hengyang, Hunan 421008, P. R. China

<sup>b</sup> Key Laboratory for Green Organic Synthesis and Application of Hunan Province, Key Laboratory of Environmentally Friendly Chemistry and Application of Ministry of Education, College of Chemistry, Xiangtan University, Xiangtan 411105, P. R. China

E-mail: [penghuini2020@hynu.edu.cn](mailto:penghuini2020@hynu.edu.cn); [gjdeng@xtu.edu.cn](mailto:gjdeng@xtu.edu.cn)

#### Table of Contents

|                                                                                                  |            |
|--------------------------------------------------------------------------------------------------|------------|
| <b>1. General information</b>                                                                    | <b>S1</b>  |
| <b>2. The Synthetic Procedure for Compounds 2</b>                                                | <b>S1</b>  |
| <b>3. The Synthetic Procedure for Compounds 3</b>                                                | <b>S2</b>  |
| <b>4. The Synthetic Procedure for Compounds 4</b>                                                | <b>S3</b>  |
| <b>5. Supporting tables S1-S6</b>                                                                | <b>S3</b>  |
| <b>6. Characterization data of products</b>                                                      | <b>S9</b>  |
| <b>7. References</b>                                                                             | <b>S31</b> |
| <b>8. Crystal data and structure refinement for 4a</b>                                           | <b>S32</b> |
| <b>9. Copies of <sup>1</sup>H, <sup>13</sup>C and <sup>19</sup>F NMR spectra of all products</b> | <b>S40</b> |

## 1. General information

All reactions were carried out under an atmosphere of air unless otherwise noted. Column chromatography was performed using silica gel (neutral) (200-300 mesh).  $^1\text{H}$ ,  $^{13}\text{C}$ , and  $^{19}\text{F}$  NMR spectra were recorded on Bruker-AV (400, 100, and 376 MHz, respectively) and Bruker Avance-500 instrument (500, 126, and 471 MHz, respectively) instrument internally referenced to tetramethylsilane (TMS) or chloroform signals. Multiplicities are described as s (singlet), d (doublet), t (triplet), dd (doublet of doublets), m (multiplet), and the coupling constants (J) are reported in Hertz. High-resolution mass spectra (HRMS) were recorded at a Waters corporation, Acquity UPLC H-Class XEVO G2-XS QTOF instrument. Low-resolution mass spectra (LRMS) data were measured on GCMS-QP 2010 Ultra. Reactions were monitored by thin-layer chromatography. The structures of known compounds were further corroborated by comparing their  $^1\text{H}$ ,  $^{13}\text{C}$ ,  $^{19}\text{F}$  NMR data, and MS data with those of the literature. All reagents were obtained from commercial suppliers and used without further purification. The molecular weight of  $\text{S}_8$  is determined to be 256 g/mol unless otherwise noted.

## 2. The Synthetic Procedure for Compounds 2

Indole derivatives **1** (0.4 mmol),  $\text{S}_8$  (51.2 mg, 0.2 mmol), HI (12  $\mu\text{L}$ , 0.04 mmol, 20 mol%, 55% w/w aqueous. solution, stab with 1.5% hypophosphorous acid), DMSO (60.0  $\mu\text{L}$ , 0.8 mmol), 2-picoline (60.0  $\mu\text{L}$ , 0.6 mmol), and 1,4-dioxane (0.8 mL) were added successfully to a 10 mL oven-dried reaction vessel. The reaction vessel was stirred at 150  $^\circ\text{C}$  for 12 h under an air atmosphere. After cooling to room temperature, the reaction was diluted with dichloromethane (DCM, 8 mL) and the volatiles were removed under reduced pressure. The residue was purified by column chromatography on silica gel (petroleum ether/ DCM, v/v) to yield the desired product **2**.

### Gram-scale experiment for the synthesis of 2a:

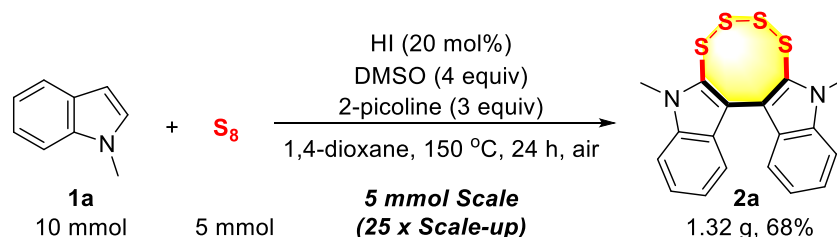

1-Methylindole **1a** (1.31 mL, 10 mmol),  $\text{S}_8$  (1.28 g, 5 mmol), HI (300  $\mu\text{L}$ , 1.0 mmol, 20 mol%, 55% w/w aqueous. solution, stab with 1.5% hypophosphorous acid), DMSO (1.5 mL, 20.0 mmol),

2-picoline (1.5 mL, 15.0 mmol), and 1,4-dioxane (25 mL) were added successfully to a 100 mL oven-dried reaction flask. The sealed reaction flask was stirred at 150 °C for 24 h. After cooling to room temperature, the reaction was diluted with DCM (25 mL) and saturated solution of Na<sub>2</sub>S<sub>2</sub>O<sub>3</sub> (40 mL). The organic layer was separated, and the aqueous layer was extracted with DCM (100 mL) three times. The combined organic layer and dried over magnesium sulfate and the volatiles were removed under reduced pressure. The residue was purified by column chromatography on silica gel (PE/DCM: 80/1) to yield the desired product **3a** (1.32 g, 68%) as a yellow solid.

### 3. The Synthetic Procedure for Compounds 3

Indole derivatives **1** (0.4 mmol), S<sub>8</sub> (128.0 mg, 0.5 mmol), HI (24 μL, 0.08 mmol, 20 mol%, 55% w/w aqueous. solution, stab with 1.5% hypophosphorous acid), DMSO (120.0 μL, 1.6 mmol), 2-picoline (120.0 μL, 1.2 mmol), and PhCl (1.0 mL) were added successfully to a 10 mL oven-dried reaction vessel. The reaction vessel was stirred at 130 °C for 12 h under an air atmosphere. After cooling to room temperature, the reaction was diluted with DCM (8 ml) and the volatiles were removed under reduced pressure. The residue was purified by column chromatography on silica gel (petroleum ether/ DCM, v/v) to yield the desired product **3**.

#### Gram-scale experiment for the synthesis of **3a**:

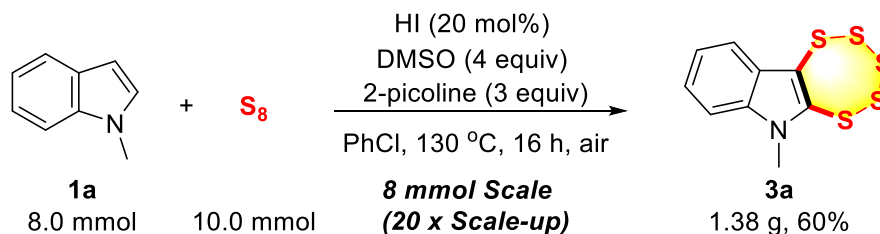

1-Methylindole **1a** (1.0 mL, 8.0 mmol), S<sub>8</sub> (2.56 g, 10 mmol), HI (0.48 mL, 1.6 mmol, 20 mol%, 55% w/w aqueous. solution, stab with 1.5% hypophosphorous acid), DMSO (2.4 mL, 32.0 mmol), 2-picoline (2.4 mL, 24.0 mmol), and PhCl (30 mL) were added successfully to a 100 mL oven-dried reaction flask. The sealed reaction flask was stirred at 130 °C for 16 h. After cooling to room temperature, the reaction was diluted with DCM (40 mL) saturated solution of Na<sub>2</sub>S<sub>2</sub>O<sub>3</sub> (40 mL). The organic layer was separated, and the aqueous layer was extracted with DCM (100 mL) three times. The combined organic layer and dried over magnesium sulfate and the volatiles were removed under reduced pressure. The residue was purified by column chromatography on silica gel (PE/DCM: 100/1) to yield the desired product **2a** (1.38 g, 60%) as a yellow solid.

#### 4. The Synthetic Procedure for Compounds 4

Indole derivatives **1** (0.4 mmol), S<sub>8</sub> (51.2 mg, 0.2 mmol), HI (12 μL, 0.04 mmol, 20 mol%, 55% w/w aqueous. solution, stab with 1.5% hypophosphorous acid), 2-picoline (60.0 μL, 0.6 mmol), and 1,2-dichlorobenzene (*o*-DCB, 0.8 mL) were added successfully to a 10 mL oven-dried reaction vessel. The reaction vessel was stirred at 150 °C for 12 h under an air atmosphere. After cooling to room temperature, the reaction was diluted with DCM (8 mL) and the volatiles were removed under reduced pressure. The residue was purified by column chromatography on silica gel (petroleum ether/ DCM, v/v) to yield the desired product **4**.

#### Gram-scale experiment for the synthesis of 4a:

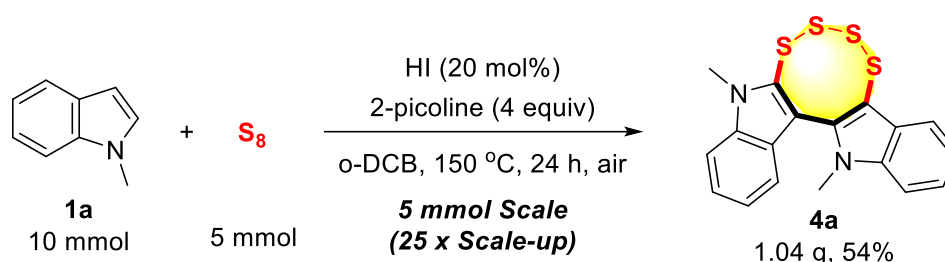

1-Methylindole **1a** (1.31 mL, 10 mmol), S<sub>8</sub> (1.28 g, 5 mmol), HI (300 μL, 1.0 mmol, 20 mol%, 55% w/w aqueous. solution, stab with 1.5% hypophosphorous acid), 2-picoline (1.5 mL, 15.0 mmol), and 1,2-dichlorobenzene (25 mL) were added successfully to a 100 mL oven-dried reaction flask. The sealed reaction flask was stirred at 150 °C for 24 h. After cooling to room temperature, the reaction was diluted with DCM 25 mL and a saturated solution of Na<sub>2</sub>S<sub>2</sub>O<sub>3</sub> (40 mL). The organic layer was separated, and the aqueous layer was extracted with DCM (100 mL) three times. The combined organic layer was brine and dried over magnesium sulfate and the volatiles were removed under reduced pressure. The residue was purified by column chromatography on silica gel (PE/DCM: 15/1) to yield the desired product **4a** (1.04 g, 54%) as a yellow solid.

#### 5. Supporting tables S1-S6

**Table S1.** Screening the reaction conditions of **2a**<sup>a</sup>

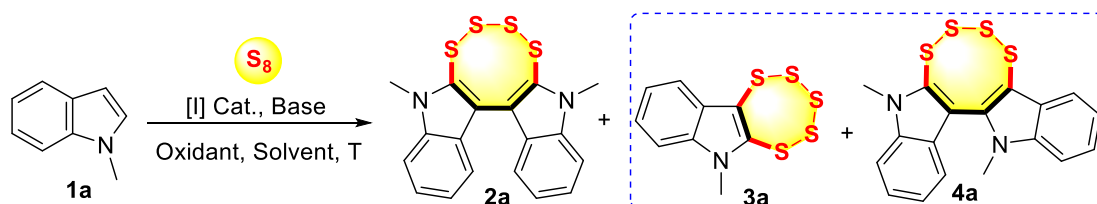

| Entry           | [I] Cat.  | Base              | Oxidant                         | Solvent            | T (°C)     | Isolated yield (%)  |
|-----------------|-----------|-------------------|---------------------------------|--------------------|------------|---------------------|
|                 |           |                   |                                 |                    |            | <b>2a, 3a, 4a</b>   |
| 1               | HI        | pyridine          | DMSO                            | 1,4-dioxane        | 150        | 63, 8, trace        |
| <b>2</b>        | <b>HI</b> | <b>2-picoline</b> | <b>DMSO</b>                     | <b>1,4-dioxane</b> | <b>150</b> | <b>73, 5, trace</b> |
| 3               | HI        | 3-methylpyridine  | DMSO                            | 1,4-dioxane        | 150        | 62, 8, n trace      |
| 4               | HI        | 4-methylpyridine  | DMSO                            | 1,4-dioxane        | 150        | 60, 7, trace        |
| 5               | HI        | DMAP              | DMSO                            | 1,4-dioxane        | 150        | 52, 11, trace       |
| 6               | HI        | 2,2'-bipyridine   | DMSO                            | 1,4-dioxane        | 150        | 61, trace, trace.   |
| 7               | HI        | quinoline         | DMSO                            | 1,4-dioxane        | 150        | 57, 15, trace       |
| 8               | HI        | isoquinoline      | DMSO                            | 1,4-dioxane        | 150        | 68, trace, trace    |
| 9               | HI        | diethylamine      | DMSO                            | 1,4-dioxane        | 150        | trace, n.d. n.d.    |
| 10              | HI        | triethylamine     | DMSO                            | 1,4-dioxane        | 150        | 23, trace, n.d.     |
| 11              | HI        | pyrrolidine       | DMSO                            | 1,4-dioxane        | 150        | 21, trace, n.d.     |
| 12              | HI        | piperidine        | DMSO                            | 1,4-dioxane        | 150        | 39, trace, n.d.     |
| 13              | HI        | morpholine        | DMSO                            | 1,4-dioxane        | 150        | 45, 11, n.d.        |
| 14              | HI        | 2-picoline        | DBSO                            | 1,4-dioxane        | 150        | 65, 5, trace        |
| 15              | HI        | 2-picoline        | PhSOMe                          | 1,4-dioxane        | 150        | 55, 10, n.d.        |
| 16              | HI        | 2-picoline        | Ph <sub>2</sub> SO              | 1,4-dioxane        | 150        | 13, 19, trace       |
| 17              | HI        | 2-picoline        | Sulfolane                       | 1,4-dioxane        | 150        | 15, 23, trace       |
| 18              | HI        | 2-picoline        | Ph <sub>2</sub> SO <sub>2</sub> | 1,4-dioxane        | 150        | 17, 26, trace       |
| 19              | HI        | 2-picoline        | DMSO                            | toluene            | 150        | 36, 27, n.d.        |
| 20              | HI        | 2-picoline        | DMSO                            | <i>o</i> -xylene   | 150        | 38, 30, n.d.        |
| 21              | HI        | 2-picoline        | DMSO                            | mesitylene         | 150        | 31, 26, n.d.        |
| 22              | HI        | 2-picoline        | DMSO                            | anisole            | 150        | 29, 25, n.d.        |
| 23              | HI        | 2-picoline        | DMSO                            | PhCF <sub>3</sub>  | 150        | 42, 22, n.d.        |
| 24              | HI        | 2-picoline        | DMSO                            | PhCl               | 150        | 68, 9, trace        |
| 25              | HI        | 2-picoline        | DMSO                            | <i>o</i> -DCB      | 150        | 65, trace, 7        |
| 26              | HI        | 2-picoline        | DMSO                            | pyridine           | 150        | 61, n.d. n.d.       |
| 27              | HI        | 2-picoline        | DMSO                            | quinoline          | 150        | 59, n.d. n.d.       |
| 28              | HI        | 2-picoline        | DMSO                            | DMF                | 150        | trace, trace, n.d.  |
| 29              | HI        | 2-picoline        | DMSO                            | NMP                | 150        | 51, n.d. n.d.       |
| 30              | HI        | 2-picoline        | DMSO                            | 1,4-dioxane        | 140        | 53, 22, 9           |
| 31              | HI        | 2-picoline        | DMSO                            | 1,4-dioxane        | 130        | 9, 51, n.d.         |
| 32              | HI        | ---               | DMSO                            | 1,4-dioxane        | 150        | n.d. n.d. n.d.      |
| 33              | HI        | 2-picoline        | ----                            | 1,4-dioxane        | 150        | 27, n.d. 19         |
| 34              | ---       | 2-picoline        | DMSO                            | 1,4-dioxane        | 150        | n.d. trace, n.d.    |
| 35 <sup>b</sup> | HI        | 2-picoline        | DMSO                            | 1,4-dioxane        | 150        | 70, 6, trace        |
| 36 <sup>c</sup> | HI        | 2-picoline        | DMSO                            | 1,4-dioxane        | 150        | 65, 11, n.d.        |
| 37 <sup>d</sup> | ---       | 2-picoline        | DMSO                            | 1,4-dioxane        | 150        | n.d. 13, n.d.       |
| 38 <sup>e</sup> | ---       | 2-picoline        | DMSO                            | 1,4-dioxane        | 150        | n.d. trace, n.d.    |

<sup>a</sup> Conditions: **1a** (0.4 mmol), S<sub>8</sub> (51.6 mg, 0.2 mmol), [I] catalyst (20 mol%), oxidant (4 equiv), base (3 equiv), solvent (1.0 mL), 150 °C, 12 h, under air atmosphere. Isolated yield based on **1a**. <sup>b</sup> Under Ar. <sup>c</sup> Under O<sub>2</sub>. <sup>d</sup> HBr (20 mol%). <sup>e</sup> HCl (20 mol%).

**Table S2.** Screening the reaction conditions of **3a**<sup>a</sup>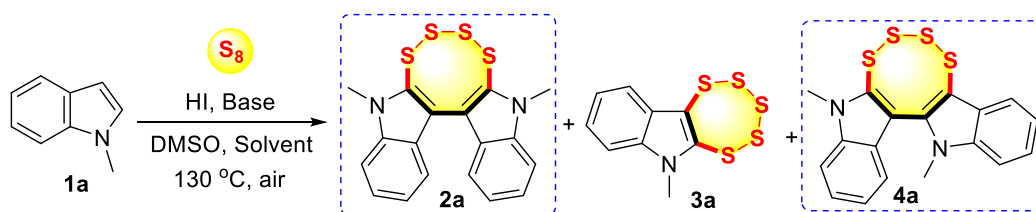

| Entry           | Base              | Solvent           | Isolated yield (%)     |
|-----------------|-------------------|-------------------|------------------------|
|                 |                   |                   | <b>2a, 3a, 4a</b>      |
| 1               | pyridine          | 1,4-dioxane       | 7, 53, n.d.            |
| 2               | 2-picoline        | 1,4-dioxane       | 9, 63, n.d.            |
| 3               | 3-methylpyridine  | 1,4-dioxane       | 8, 55, n.d.            |
| 4               | 4-methylpyridine  | 1,4-dioxane       | 7, 52, n.d.            |
| 5               | DMAP              | 1,4-dioxane       | 8, 56, n.d.            |
| 6               | 2,2'-bipyridine   | 1,4-dioxane       | 9, 48, n.d.            |
| 7               | quinoline         | 1,4-dioxane       | 8, 47, n.d.            |
| 8               | isoquinoline      | 1,4-dioxane       | 8, 57, n.d.            |
| 9               | 2-picoline        | toluene           | trace, 55, n.d.        |
| 10              | 2-picoline        | <i>o</i> -xylene  | trace, 60, n.d.        |
| 11              | 2-picoline        | mesitylene        | trace, 57, n.d.        |
| 12              | 2-picoline        | PhCF <sub>3</sub> | trace, 62, n.d.        |
| <b>13</b>       | <b>2-picoline</b> | <b>PhCl</b>       | <b>trace, 71, n.d.</b> |
| 14              | 2-picoline        | <i>o</i> -DCB     | n.d. 62, trace         |
| 15              | 2-picoline        | pyridine          | n.d. 63, n.d.          |
| 16              | 2-picoline        | quinoline         | trace, 51, n.d.        |
| 17              | 2-picoline        | NMP               | 21, trace, n.d.        |
| 18              | ---               | PhCl              | n.d. n.d. n.d.         |
| 19 <sup>b</sup> | 2-picoline        | PhCl              | trace, 70, n.d.        |
| 20 <sup>c</sup> | 2-picoline        | PhCl              | 7, 67, n.d.            |
| 21 <sup>d</sup> | 2-picoline        | PhCl              | trace, 57, n.d.        |
| 22 <sup>e</sup> | 2-picoline        | PhCl              | trace, 16, n.d.        |

<sup>a</sup> Conditions: **1a** (0.4 mmol),  $S_8$  (128 mg, 0.5 mmol), HI (20 mol%), oxidant (4 equiv), base (3 equiv), solvent (1.0 mL), 130 °C, 12 h, under air atmosphere. Isolated yield based on **1a**. <sup>b</sup> Under Ar. <sup>c</sup> Under O<sub>2</sub>. <sup>d</sup> HBr (20 mol%) instead of HI. <sup>e</sup> HCl (20 mol%) instead of HI.

**Table S3.** Screening the reaction conditions of **4a**<sup>a</sup>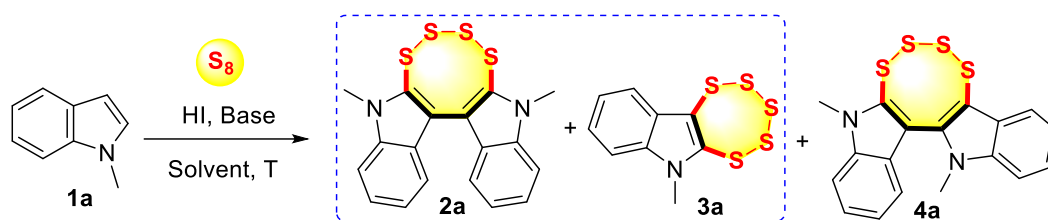

| Entry                 | Base              | Solvent             | T (°C)     | Isolated yield (%)    |
|-----------------------|-------------------|---------------------|------------|-----------------------|
|                       |                   |                     |            | <b>2a, 3a, 4a</b>     |
| 1                     | pyridine          | <i>o</i> -DCB       | 150        | 7, n.d. 53            |
| 2                     | 2-picoline        | <i>o</i> -DCB       | 150        | trace, n.d. 58        |
| 3                     | 3-methylpyridine  | <i>o</i> -DCB       | 150        | 5, n.d. 56            |
| 4                     | 4-methylpyridine  | <i>o</i> -DCB       | 150        | 7, n.d. 54            |
| 5                     | DMAP              | <i>o</i> -DCB       | 150        | 6, n.d. 50            |
| 6                     | 2,2'-bipyridine   | <i>o</i> -DCB       | 150        | 11, n.d. 52           |
| 7                     | quinoline         | <i>o</i> -DCB       | 150        | 16, n.d. 47           |
| 8                     | isoquinoline      | <i>o</i> -DCB       | 150        | 8, n.d. 57            |
| 9                     | 2-picoline        | toluene             | 150        | 26, trace, n.d.       |
| 10                    | 2-picoline        | <i>o</i> -xylene    | 150        | 24, trace, n.d.       |
| 11                    | 2-picoline        | mesitylene          | 150        | 19, trace, n.d.       |
| 12                    | 2-picoline        | anisole             | 150        | 30, trace, n.d.       |
| 13                    | 2-picoline        | PhCF <sub>3</sub>   | 150        | 37, n.d., trace       |
| 14                    | 2-picoline        | PhCl                | 150        | 13, n.d. 41           |
| 15                    | 2-picoline        | pyridine            | 150        | 53, n.d. n.d.         |
| 16                    | 2-picoline        | NMP                 | 150        | 47, n.d. n.d.         |
| 17                    | 2-picoline        | <i>o</i> -DCB       | 140        | 13, n.d. 39           |
| <b>18<sup>b</sup></b> | <b>2-picoline</b> | <b><i>o</i>-DCB</b> | <b>150</b> | <b>trace, n.d. 63</b> |
| 19 <sup>c</sup>       | 2-picoline        | <i>o</i> -DCB       | 150        | trace, n.d. 60        |
| 20                    | ---               | <i>o</i> -DCB       | 150        | n.d. trace n.d.       |
| 21 <sup>d</sup>       | 2-picoline        | <i>o</i> -DCB       | 150        | trace, n.d. trace     |
| 22 <sup>e</sup>       | 2-picoline        | <i>o</i> -DCB       | 150        | trace, n.d. trace     |

<sup>a</sup> Conditions: **1a** (0.4 mmol), S<sub>8</sub> (51.6 mg, 0.2 mmol), HI (20 mol%), base (3 equiv), solvent (1.0 mL), 12 h, under air atmosphere. Isolated yield based on **1a**. <sup>b</sup> 2-Picoline (4 equiv). <sup>c</sup> 2-Picoline (5 equiv). <sup>d</sup> HBr (20 mol%) instead of HI. <sup>e</sup> HCl (20 mol%) instead of HI.

**Table S4.** Free radical capture experiments

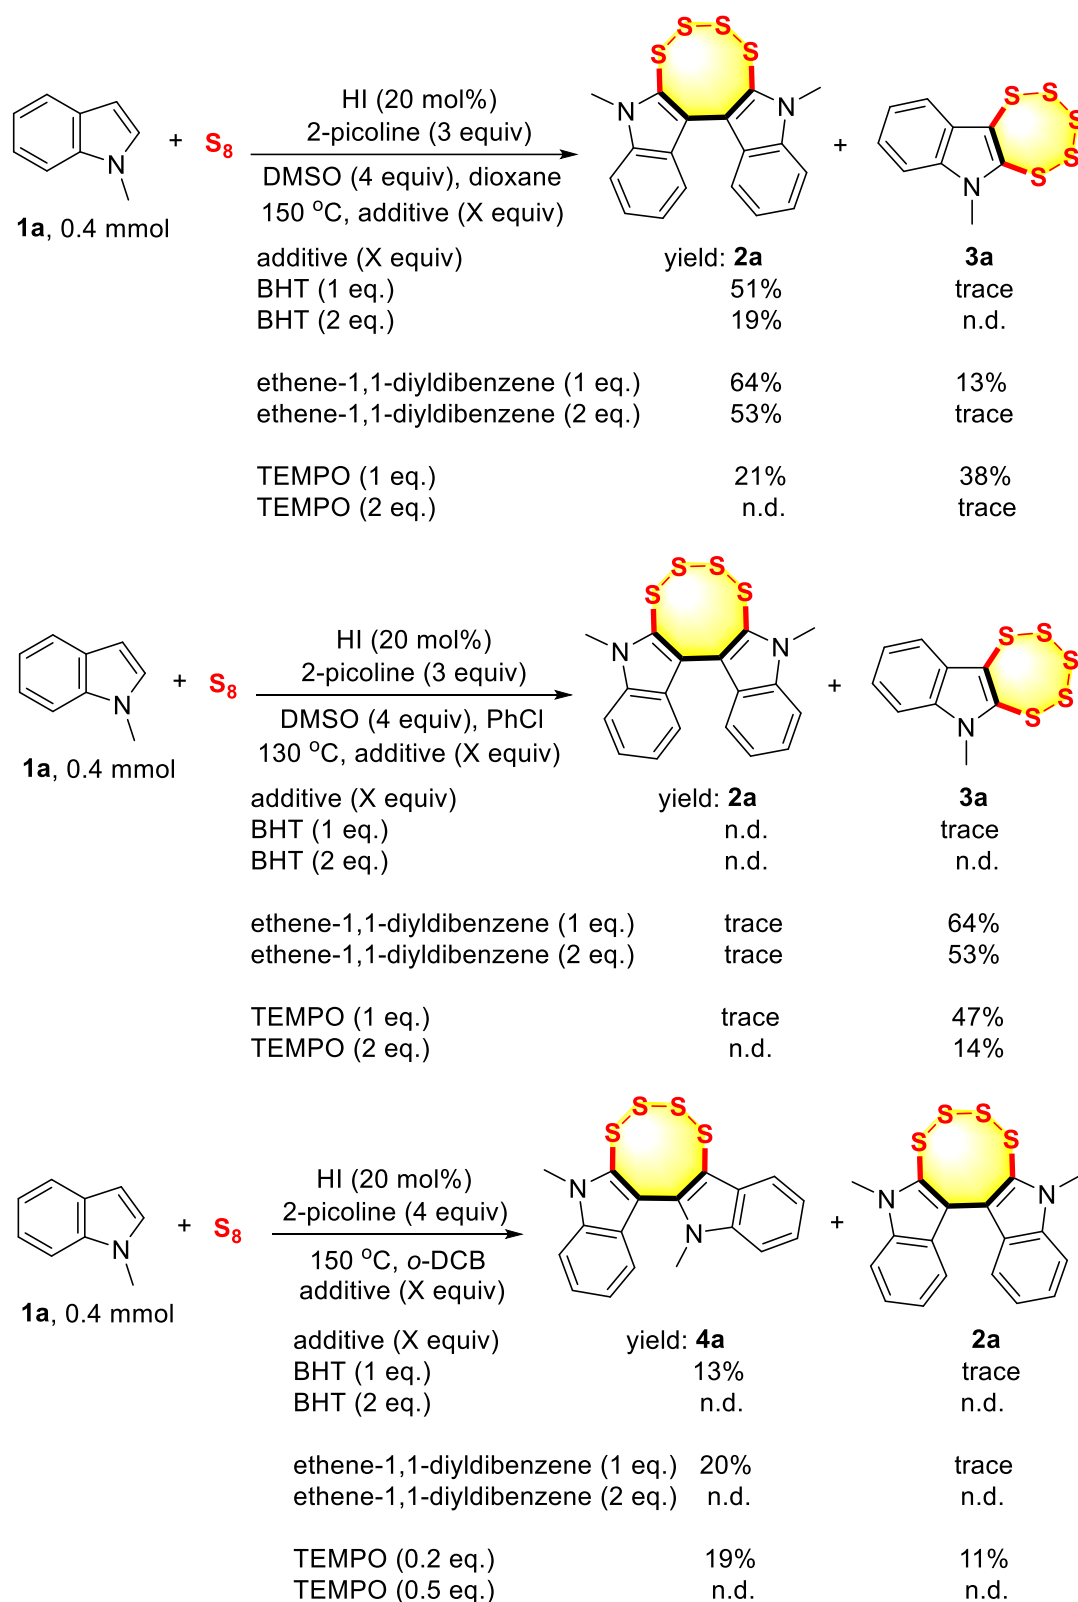



**Table S5.** Norbornene capture polysulfur radical anion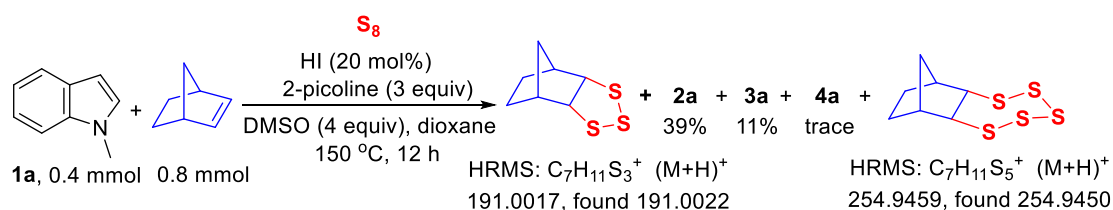

1-Methylindole **1a** (0.4 mmol), bicyclo[2.2.1]hept-2-ene (norbornene, 0.8 mmol),  $S_8$  (128 mg, 0.5 mmol), HI (12  $\mu$ L, 0.04 mmol, 20 mol%, 55% w/w aqueous. solution, stab with 1.5% hypophosphorous acid), DMSO (60.0  $\mu$ L, 0.8 mmol), 2-picoline (60.0  $\mu$ L, 0.6 mmol), and 1,4-dioxane (1.0 mL) were added successfully to a 10 mL oven-dried reaction vessel. The reaction vessel was stirred at 150 °C for 12 h under an air atmosphere. After cooling to room temperature, the reaction was diluted with dichloromethane (DCM, 25 mL). (3*aR*, 4*R*, 7*S*, 7*aS*)-Hexahydro-4,7-methanobenzo[*d*][1,2,3]trithiole and (6*R*,9*S*)-hexahydro-6,9-methanobenzo[*f*][1,2,3,4,5]pentathiepine was detected by HRMS, respectively. HRMS (ESI, *m/z*) calcd for  $C_7H_{11}S_3^+$  [M+H]<sup>+</sup>: 191.0017; found: 191.0022. HRMS (ESI, *m/z*) calcd for  $C_7H_{11}S_5^+$  [M+H]<sup>+</sup>: 254.9459; found: 254.9450.

**Table S6.** Possible reaction mechanism of **4a**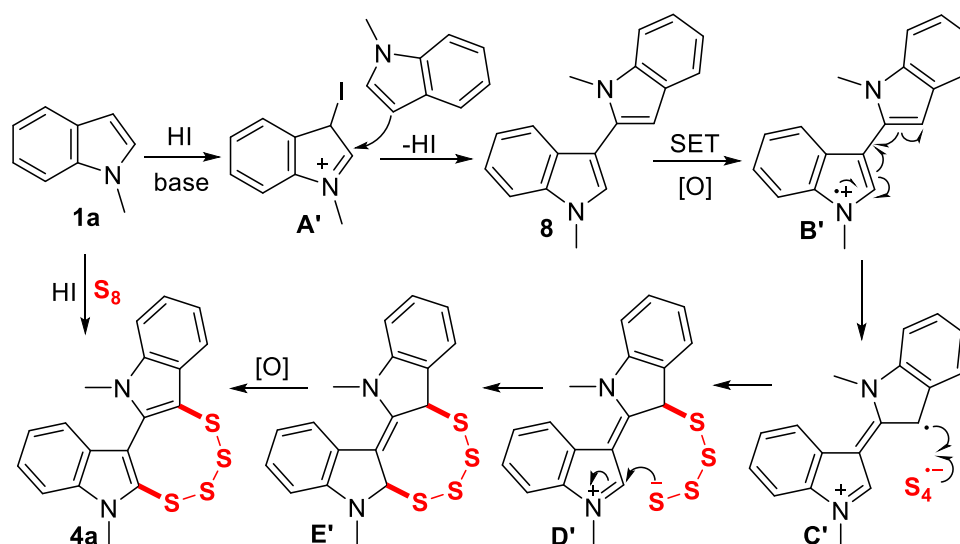

Based on the above experimental observations and related references,<sup>[1]</sup> We propose a possible mechanism for the formation of asymmetric tetrathiadiindole **4a** by sulfur. Polysulfide radical anion ( $S_n^{\cdot-}$ ) was generated in situ from  $S_8$  under standard conditions.<sup>[2]</sup> First, the nucleophilic

attack of indole on the iodine atom of HI forms intermediate **A'**. Then, an intermolecular nucleophilic addition reaction of the second indole and the elimination of a molecule of hydrogen iodide were carried out to obtain 2,3'-biindolyl **8**. A nitrogen radical cation **B'** is generated *via* single-electron transfer (SET) promoted by an HI/DMSO oxidation system. This intermediate can further convert into vinyl radical intermediate **C'** *via* an isomerization step. Then **C'** reacts with the tetrasulfide radical anion to form a tetrathioindole intermediate **D'**, which undergoes an intramolecular nucleophilic attack to remove the proton to give **E'**. The final desired product **4a** is formed through the oxidation of **E'**.

## 6. Characterization data of products

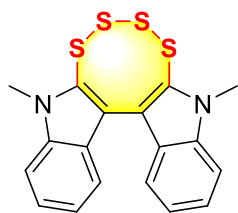

### **5,10-Dimethyl-5,10-dihydro-[1,2,3,4]tetrathiocino[5,6-*b*:8,7-*b'*]diindole (2a, CAS: 13637-40-6)**

<sup>3</sup>]: Purified by silica gel flash chromatography with petroleum ether and dichloromethane (50:1, v/v). The **2a** was prepared as a yellow solid following the general procedure in 73% yield (56.5 mg); <sup>1</sup>H NMR (400 MHz, CDCl<sub>3</sub>, ppm) δ 7.47 (d, *J* = 8.0 Hz, 2H), 7.44 – 7.41 (m, 2H), 7.39 – 7.34 (m, 2H), 7.13 – 7.06 (m, 2H), 4.00 (s, 6H); <sup>13</sup>C NMR (100 MHz, CDCl<sub>3</sub>, ppm) δ 137.5, 128.1, 126.7, 124.8, 121.2, 121.0, 120.4, 110.3, 30.7; HRMS calcd. for C<sub>18</sub>H<sub>14</sub>N<sub>2</sub>NaS<sub>4</sub><sup>+</sup> (M+Na)<sup>+</sup> 408.9932, found 408.9926.

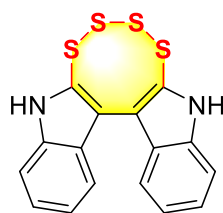

### **5,10-Dihydro-[1,2,3,4]tetrathiocino[5,6-*b*:8,7-*b'*]diindole (2b, CAS: 13839-92-4)<sup>[4]</sup>**

Purified by silica gel flash chromatography with petroleum ether and dichloromethane (8:1, v/v). The **2b** was prepared as a yellow solid following the general procedure in 55% yield (39.5 mg); <sup>1</sup>H NMR (400 MHz, DMSO-*d*<sub>6</sub>, ppm) δ 12.16 (s, 2H), 7.50 (d, *J* = 8.2 Hz, 2H), 7.35 – 7.31 (m, 2H), 7.30 – 7.27 (m, 2H), 7.06 (t, *J* = 7.5 Hz, 2H); <sup>13</sup>C NMR (100 MHz, DMSO-*d*<sub>6</sub>, ppm) δ 136.2, 126.9, 124.8, 124.5, 120.2, 120.1, 119.2, 112.1; HRMS calcd. for C<sub>16</sub>H<sub>11</sub>N<sub>2</sub>S<sub>4</sub><sup>+</sup> (M+H)<sup>+</sup> 358.9800, found 358.9803.

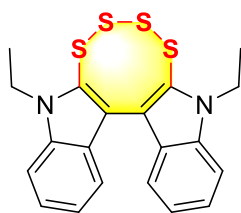

### **5,10-Diethyl-5,10-dihydro-[1,2,3,4]tetrathiocino[5,6-*b*:8,7-*b'*]diindole (2c):** Purified by silica

gel flash chromatography with petroleum ether and dichloromethane (50:1, v/v). The **2c** was prepared as yellow solid following the general procedure in 80% yield (66.3 mg);  $^1\text{H}$  NMR (400 MHz,  $\text{CDCl}_3$ , ppm)  $\delta$  7.40 (d,  $J = 8.1$  Hz, 2H), 7.34 (d,  $J = 8.4$  Hz, 2H), 7.26 (t,  $J = 7.6$  Hz, 2H), 7.00 (t,  $J = 7.5$  Hz, 2H), 4.57 – 4.45 (m, 2H), 4.43 – 4.32 (m, 2H), 1.38 (t,  $J = 7.2$  Hz, 6H);  $^{13}\text{C}$  NMR (100 MHz,  $\text{CDCl}_3$ , ppm)  $\delta$  136.4, 127.2, 126.9, 124.6, 121.5, 121.0, 120.2, 110.2, 39.0, 15.7; HRMS calcd. for  $\text{C}_{20}\text{H}_{18}\text{N}_2\text{NaS}_4^+$  ( $\text{M}+\text{Na}$ ) $^+$  437.0245, found 437.0248.

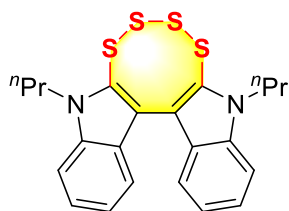

**5,10-Dipropyl-5,10-dihydro-[1,2,3,4]tetrathiocino[5,6-*b*:8,7-*b'*]diindole (2d)**: Purified by silica gel flash chromatography with petroleum ether and dichloromethane (50:1, v/v). The **2d** was prepared as yellow solid following the general procedure in 72% yield (63.7 mg);  $^1\text{H}$  NMR (500 MHz,  $\text{CDCl}_3$ , ppm)  $\delta$  7.47 – 7.41 (m, 4H), 7.39 – 7.31 (m, 2H), 7.08 (t,  $J = 7.5$  Hz, 2H), 4.53 – 4.44 (m, 2H), 4.43 – 4.34 (m, 2H), 2.05 – 1.88 (m, 4H), 1.04 (t,  $J = 7.4$  Hz, 6H);  $^{13}\text{C}$  NMR (126 MHz,  $\text{CDCl}_3$ , ppm)  $\delta$  136.9, 127.8, 126.8, 124.6, 121.4, 120.9, 120.2, 110.5, 45.8, 23.9, 11.6; HRMS calcd. for  $\text{C}_{22}\text{H}_{23}\text{N}_2\text{S}_4^+$  ( $\text{M}+\text{H}$ ) $^+$  443.0739, found 443.0746.

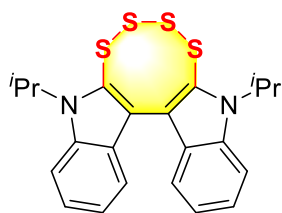

**5,10-Dipropyl-5,10-dihydro-[1,2,3,4]tetrathiocino[5,6-*b*:8,7-*b'*]diindole (2e)**: Purified by silica gel flash chromatography with petroleum ether and dichloromethane (50:1, v/v). The **2e** was prepared as yellow solid following the general procedure in 65% yield (57.8 mg);  $^1\text{H}$  NMR (400 MHz,  $\text{CDCl}_3$ , ppm)  $\delta$  7.66 (d,  $J = 8.5$  Hz, 2H), 7.49 – 7.47 (m, 2H), 7.39 – 7.30 (m, 2H), 7.08 – 7.05 (m, 2H), 5.51 – 5.48 (m, 2H), 1.79 (d,  $J = 7.0$  Hz, 6H), 1.72 (d,  $J = 7.1$  Hz, 6H);  $^{13}\text{C}$  NMR (100 MHz,  $\text{CDCl}_3$ , ppm)  $\delta$  135.4, 127.9, 127.7, 124.0, 121.8, 121.3, 119.8, 112.2, 48.3, 21.6; HRMS calcd. for  $\text{C}_{22}\text{H}_{23}\text{N}_2\text{S}_4^+$  ( $\text{M}+\text{H}$ ) $^+$  443.0739, found 443.0736.

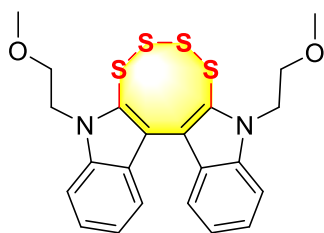

**5,10-Bis(2-methoxyethyl)-5,10-dihydro-[1,2,3,4]tetrathiocino[5,6-*b*:8,7-*b'*]diindole (2f):**

Purified by silica gel flash chromatography with petroleum ether and dichloromethane (20:1, v/v). The **2f** was prepared as yellow solid following the general procedure in 71% yield (67.5 mg);  $^1\text{H}$  NMR (500 MHz,  $\text{CDCl}_3$ , ppm)  $\delta$  7.51 (d,  $J = 8.4$  Hz, 2H), 7.46 – 7.44 (m, 2H), 7.38 – 7.34 (m, 2H), 7.13 – 7.05 (m, 2H), 4.77 – 4.69 (m, 2H), 4.66 – 4.58 (m, 2H), 3.80 (t,  $J = 6.3$  Hz, 4H), 3.36 (s, 6H);  $^{13}\text{C}$  NMR (126 MHz,  $\text{CDCl}_3$ , ppm)  $\delta$  137.4, 127.8, 126.8, 124.8, 121.3, 121.3, 120.5, 110.7, 71.6, 59.2, 43.9; HRMS calcd. for  $\text{C}_{22}\text{H}_{22}\text{KN}_2\text{O}_2\text{S}_4^+$  ( $\text{M}+\text{K}$ ) $^+$  513.0196, found 513.0205.

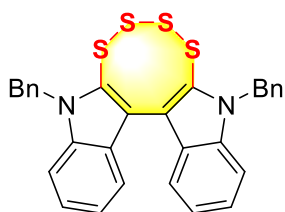

**5,10-Dibenzyl-5,10-dihydro-[1,2,3,4]tetrathiocino[5,6-*b*:8,7-*b'*]diindole (2g):** Purified by silica gel flash chromatography with petroleum ether and dichloromethane (40:1, v/v). The **2g** was prepared as yellow solid following the general procedure in 60% yield (64.7 mg);  $^1\text{H}$  NMR (400 MHz,  $\text{CDCl}_3$ , ppm)  $\delta$  7.54 (d,  $J = 8.1$  Hz, 2H), 7.39 – 7.33 (m, 2H), 7.33 – 7.28 (m, 6H), 7.27 – 7.22 (m, 2H), 7.18 – 7.09 (m, 6H), 5.80 (d,  $J = 16.5$  Hz, 2H), 5.67 (d,  $J = 16.5$  Hz, 2H);  $^{13}\text{C}$  NMR (400 MHz,  $\text{CDCl}_3$ , ppm)  $\delta$  137.5, 137.2, 128.7, 128.4, 127.4, 127.0, 126.6, 125.0, 121.4, 121.2, 120.6, 110.9, 47.6; HRMS calcd. for  $\text{C}_{30}\text{H}_{23}\text{N}_2\text{S}_4^+$  ( $\text{M}+\text{H}$ ) $^+$  539.0739, found 539.0732.

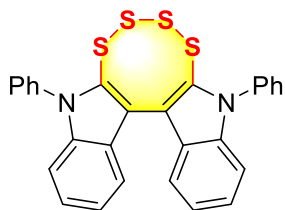

**5,10-Diphenyl-5,10-dihydro-[1,2,3,4]tetrathiocino[5,6-*b*:8,7-*b'*]diindole (2h):** Purified by silica gel flash chromatography with petroleum ether and dichloromethane (40:1, v/v). The **2h** was

prepared as yellow solid following the general procedure in 41% yield (42.1 mg);  $^1\text{H}$  NMR (400 MHz,  $\text{CDCl}_3$ , ppm)  $\delta$  7.94 (d,  $J = 6.4$  Hz, 2H), 7.57 (s, 2H), 7.52 – 7.46 (m, 4H), 7.46 – 7.39 (m, 4H), 7.34 (t,  $J = 7.0$  Hz, 2H), 7.25 – 7.18 (m, 4H);  $^{13}\text{C}$  NMR (100 MHz,  $\text{CDCl}_3$ , ppm)  $\delta$  139.1, 136.3, 131.4, 129.9, 129.6, 126.7, 124.3, 122.9, 120.9, 119.8, 110.7, 108.4; HRMS calcd. for  $\text{C}_{28}\text{H}_{18}\text{N}_2\text{NaS}_4^+$  ( $\text{M}+\text{Na}$ ) $^+$  533.0245, found 533.0240.

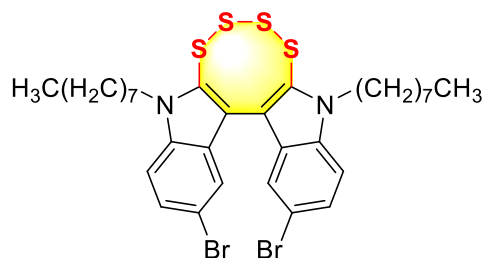

**2,13-Dibromo-5,10-dioctyl-5,10-dihydro-[1,2,3,4]tetrathiocino[5,6-*b*:8,7-*b'*]diindole (2i):**

Purified by silica gel flash chromatography with petroleum ether and dichloromethane (20:1, v/v).

The **2i** was prepared as yellow solid following the general procedure in 26% yield (39.2 mg);  $^1\text{H}$  NMR (400 MHz,  $\text{CDCl}_3$ , ppm)  $\delta$  7.82 (d,  $J = 1.9$  Hz, 2H), 7.38 (dd,  $J = 8.8, 1.9$  Hz, 2H), 7.16 (d,  $J = 8.8$  Hz, 2H), 4.44 – 4.08 (m, 4H), 1.81 – 1.64 (m, 4H), 1.40 – 1.17 (m, 20H), 0.98 – 0.69 (m, 6H);  $^{13}\text{C}$  NMR (100 MHz,  $\text{CDCl}_3$ , ppm)  $\delta$  142.3, 134.5, 130.5, 127.5, 123.2, 118.1, 115.4, 112.2, 45.5, 31.7, 30.8, 29.1, 29.1, 26.8, 22.6, 14.1; HRMS calcd. For  $\text{C}_{32}\text{H}_{40}\text{Br}_2\text{KN}_2\text{S}_4^+$  ( $\text{M}+\text{K}$ ) $^+$  777.0073, found 777.0066.

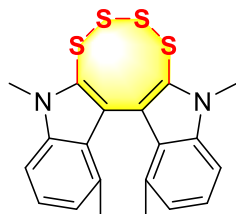

**1,5,10,14-Tetramethyl-5,10-dihydro-[1,2,3,4]tetrathiocino[5,6-*b*:8,7-*b'*]diindole (2j):**

Purified by silica gel flash chromatography with petroleum ether and dichloromethane (40:1, v/v). The **2j**

was prepared as yellow solid following the general procedure in 58% yield (48.5 mg);  $^1\text{H}$  NMR (400 MHz,  $\text{CDCl}_3$ , ppm)  $\delta$  7.26 – 7.24 (m, 4H), 6.86 – 6.85 (m, 2H), 3.99 (s, 6H), 1.95 (s, 6H);  $^{13}\text{C}$  NMR (100 MHz,  $\text{CDCl}_3$ , ppm)  $\delta$  137.4, 132.9, 130.1, 127.2, 124.6, 121.8, 121.7, 108.0, 30.8, 19.2; HRMS calcd. for  $\text{C}_{20}\text{H}_{18}\text{N}_2\text{NaS}_4^+$  ( $\text{M}+\text{H}$ ) $^+$  437.0245, found 437.0248.

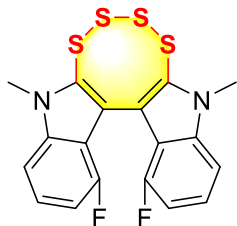

**1,14-Difluoro-5,10-dimethyl-5,10-dihydro-[1,2,3,4]tetrathiocino[5,6-*b*:8,7-*b'*]diindole (2k):**

Purified by silica gel flash chromatography with petroleum ether and dichloromethane (40:1, v/v). The **2k** was prepared as yellow solid following the general procedure in 50% yield (42.5 mg);  $^1\text{H}$  NMR (400 MHz,  $\text{CDCl}_3$ , ppm)  $\delta$  7.26 – 7.24 (m, 2H), 7.05 (d,  $J = 8.4$  Hz, 2H), 6.89 – 6.86 (m, 2H), 3.90 (s, 6H);  $^{13}\text{C}$  NMR (100 MHz,  $\text{CDCl}_3$ , ppm)  $\delta$  156.1 (d,  $J = 252.6$  Hz), 142.4, 138.9 (d,  $J = 9.0$  Hz), 125.5 (d,  $J = 7.8$  Hz), 117.6 (d,  $J = 17.7$  Hz), 116.8 (d,  $J = 3.9$  Hz), 107.4 (d,  $J = 18.8$  Hz), 106.8 (d,  $J = 4.4$  Hz), 32.1;  $^{19}\text{F}$  NMR (376 MHz,  $\text{CDCl}_3$ , ppm)  $\delta$  -121.4; HRMS calcd. for  $\text{C}_{18}\text{H}_{13}\text{F}_2\text{N}_2\text{S}_4^+$  ( $\text{M}+\text{H}$ ) $^+$  422.9924, found 422.9915.

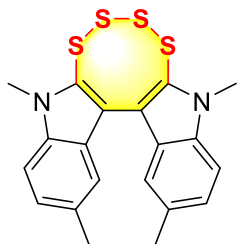

**2,5,10,13-Tetramethyl-5,10-dihydro-[1,2,3,4]tetrathiocino[5,6-*b*:8,7-*b'*]diindole (2l):** Purified by silica gel flash chromatography with petroleum ether and dichloromethane (40:1, v/v). The **2l** was prepared as yellow solid following the general procedure in 78% yield (64.9 mg);  $^1\text{H}$  NMR (400 MHz,  $\text{CDCl}_3$ , ppm)  $\delta$  7.32 (d,  $J = 8.4$  Hz, 2H), 7.25 (s, 2H), 7.21 (d,  $J = 8.6$  Hz, 2H), 3.98 (s, 6H), 2.37 (s, 6H);  $^{13}\text{C}$  NMR (100 MHz,  $\text{CDCl}_3$ , ppm)  $\delta$  135.9, 129.8, 128.1, 126.9, 126.6, 120.5, 120.4, 110.0, 30.7, 21.4; HRMS calcd. for  $\text{C}_{20}\text{H}_{18}\text{N}_2\text{NaS}_4^+$  ( $\text{M}+\text{Na}$ ) $^+$  437.0245, found 437.0248.

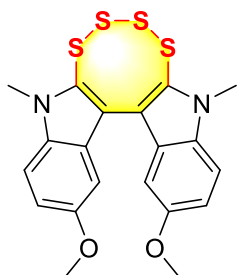

**2,13-Dimethoxy-5,10-dimethyl-5,10-dihydro-[1,2,3,4]tetrathiocino[5,6-*b*:8,7-*b'*]diindole (2m):**

Purified by silica gel flash chromatography with petroleum ether and dichloromethane (5:1, v/v).

The **2m** was prepared as yellow solid following the general procedure in 68% yield (60.7 mg); <sup>1</sup>H NMR (500 MHz, CDCl<sub>3</sub>, ppm) δ 7.34 (d, *J* = 9.0 Hz, 2H), 7.05 (dd, *J* = 9.0, 2.1 Hz, 2H), 6.85 (s, 2H), 3.99 (s, 6H), 3.68 (s, 6H); <sup>13</sup>C NMR (126 MHz, CDCl<sub>3</sub>, ppm) δ 154.7, 132.9, 128.2, 126.8, 120.5, 116.2, 111.3, 101.5, 55.8, 30.9; HRMS calcd. for C<sub>20</sub>H<sub>18</sub>N<sub>2</sub>NaO<sub>2</sub>S<sub>4</sub><sup>+</sup> (M+Na)<sup>+</sup> 469.0143, found 469.0151.

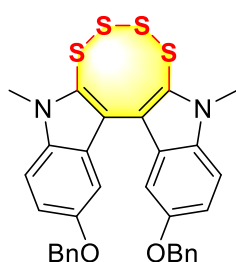

**2,13-Bis(benzyloxy)-5,10-dimethyl-5,10-dihydro-[1,2,3,4]tetrathiocino[5,6-*b*:8,7-*b'*]diindole**

**(2n):** Purified by silica gel flash chromatography with petroleum ether and dichloromethane (8:1, v/v). The **2n** was prepared as yellow solid following the general procedure in 52% yield (62.4 mg); <sup>1</sup>H NMR (400 MHz, CDCl<sub>3</sub>, ppm) δ 7.38 – 7.34 (m, 6H), 7.33 – 7.28 (m, 4H), 7.28 – 7.23 (m, 2H), 7.14 (dd, *J* = 9.0, 2.4 Hz, 2H), 6.93 (d, *J* = 2.4 Hz, 2H), 4.87 (s, 4H), 4.00 (s, 6H); <sup>13</sup>C NMR (100 MHz, CDCl<sub>3</sub>, ppm) δ 153.8, 137.1, 133.0, 128.4, 127.8, 127.6, 126.8, 120.3, 116.7, 111.6, 102.9, 70.6, 30.9; HRMS calcd. for C<sub>32</sub>H<sub>27</sub>N<sub>2</sub>O<sub>2</sub>S<sub>4</sub><sup>+</sup> (M+H)<sup>+</sup> 599.0950, found 599.0953.

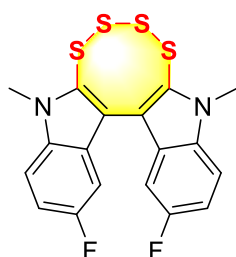

**2,13-Difluoro-5,10-dimethyl-5,10-dihydro-[1,2,3,4]tetrathiocino[5,6-*b*:8,7-*b'*]diindole (2o):**

Purified by silica gel flash chromatography with petroleum ether and dichloromethane (50:1, v/v).

The **2o** was prepared as yellow solid following the general procedure in 71% yield (60.1 mg); <sup>1</sup>H NMR (400 MHz, CDCl<sub>3</sub>, ppm) δ 7.35 (dd, *J* = 9.0, 4.2 Hz, 2H), 7.13 (td, *J* = 9.1, 2.5 Hz, 2H),



7.06 (dd,  $J = 9.0, 2.5$  Hz, 2H), 3.99 (s, 6H);  $^{13}\text{C}$  NMR (100 MHz,  $\text{CDCl}_3$ , ppm)  $\delta$  158.0 (d,  $J = 237.6$  Hz), 134.1, 129.7, 126.6 (d,  $J = 9.8$  Hz), 120.0 (d,  $J = 5.1$  Hz), 113.8 (d,  $J = 26.8$  Hz), 111.4 (d,  $J = 9.3$  Hz), 105.4 (d,  $J = 23.6$  Hz), 31.0;  $^{19}\text{F}$  NMR (376 MHz,  $\text{CDCl}_3$ , ppm)  $\delta$  -122.2; HRMS calcd. for  $\text{C}_{18}\text{H}_{13}\text{F}_2\text{N}_2\text{S}_4^+$  ( $\text{M}+\text{H}$ ) $^+$  422.9924, found 422.9915.

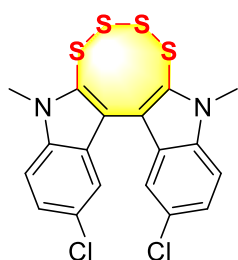

**2,13-Dichloro-5,10-dimethyl-5,10-dihydro-[1,2,3,4]tetrathiocino[5,6-*b*:8,7-*b'*]diindole (2p):**

Purified by silica gel flash chromatography with petroleum ether and dichloromethane (40:1, v/v). The **2p** was prepared as yellow solid following the general procedure in 67% yield (60.9 mg);  $^1\text{H}$  NMR (400 MHz,  $\text{CDCl}_3$ , ppm)  $\delta$  7.67 (d,  $J = 1.9$  Hz, 2H), 7.28 (dd,  $J = 8.8, 2.0$  Hz, 2H), 7.21 (d,  $J = 8.8$  Hz, 2H), 3.90 (s, 6H);  $^{13}\text{C}$  NMR (100 MHz,  $\text{CDCl}_3$ , ppm)  $\delta$  142.7, 135.0, 129.8, 128.1, 125.2, 120.0, 118.5, 111.8, 31.8; HRMS calcd. for  $\text{C}_{18}\text{H}_{13}\text{Cl}_2\text{N}_2\text{S}_4^+$  ( $\text{M}+\text{H}$ ) $^+$  454.9333, found 454.9333.

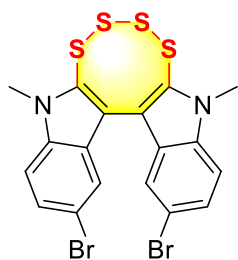

**2,13-Dibromo-5,10-dimethyl-5,10-dihydro-[1,2,3,4]tetrathiocino[5,6-*b*:8,7-*b'*]diindole (2q):**

Purified by silica gel flash chromatography with petroleum ether and dichloromethane (40:1, v/v). The **2q** was prepared as yellow solid following the general procedure in 59% yield (64.0 mg);  $^1\text{H}$  NMR (400 MHz,  $\text{CDCl}_3$ , ppm)  $\delta$  7.83 – 7.82 (m, 2H), 7.41 (dd,  $J = 8.8, 1.9$  Hz, 2H), 7.16 (d,  $J = 8.8$  Hz, 2H), 3.89 (s, 6H);  $^{13}\text{C}$  NMR (100 MHz,  $\text{CDCl}_3$ , ppm)  $\delta$  142.5, 135.2, 130.3, 127.7, 123.1, 118.4, 115.6, 112.1, 31.8; HRMS calcd. for  $\text{C}_{18}\text{H}_{13}\text{Br}_2\text{N}_2\text{S}_4^+$  ( $\text{M}+\text{H}$ ) $^+$  542.8323, found 542.8334.

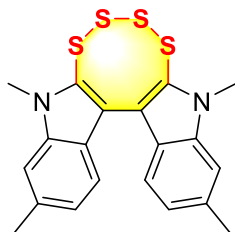

**3,5,10,12-Tetramethyl-5,10-dihydro-[1,2,3,4]tetrathiocino[5,6-*b*:8,7-*b'*]diindole (2r):** Purified by silica gel flash chromatography with petroleum ether and dichloromethane (40:1, v/v). The **2r** was prepared as yellow solid following the general procedure in 77% yield (63.9 mg);  $^1\text{H}$  NMR (400 MHz,  $\text{CDCl}_3$ , ppm)  $\delta$  7.26 (d,  $J = 8.2$  Hz, 2H), 7.12 (s, 2H), 6.84 (d,  $J = 8.2$  Hz, 2H), 3.87 (s, 6H), 2.43 (s, 6H);  $^{13}\text{C}$  NMR (100 MHz,  $\text{CDCl}_3$ , ppm)  $\delta$  137.8, 134.9, 127.1, 124.7, 122.3, 121.1, 120.9, 110.0, 30.6, 22.1; HRMS calcd. for  $\text{C}_{20}\text{H}_{18}\text{N}_2\text{NaS}_4^+$  ( $\text{M}+\text{Na}$ ) $^+$  437.0245, found 437.0248.

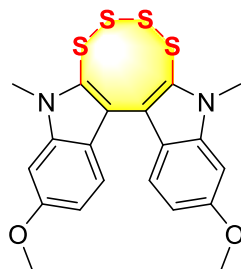

**3,12-Dimethoxy-5,10-dimethyl-5,10-dihydro-[1,2,3,4]tetrathiocino[5,6-*b*:8,7-*b'*]diindole (2s):** Purified by silica gel flash chromatography with petroleum ether and dichloromethane (6:1, v/v). The **2s** was prepared as yellow solid following the general procedure in 77% yield (68.8 mg);  $^1\text{H}$  NMR (500 MHz,  $\text{CDCl}_3$ , ppm)  $\delta$  7.34 (d,  $J = 8.7$  Hz, 2H), 6.82 (s, 2H), 6.77 (d,  $J = 8.7$  Hz, 2H), 3.96 (s, 6H), 3.91 (s, 6H);  $^{13}\text{C}$  NMR (126 MHz,  $\text{CDCl}_3$ , ppm)  $\delta$  158.7, 138.4, 126.3, 122.1, 121.5, 121.2, 111.2, 92.8, 55.7, 30.7; HRMS calcd. for  $\text{C}_{20}\text{H}_{19}\text{N}_2\text{O}_2\text{S}_4^+$  ( $\text{M}+\text{H}$ ) $^+$  447.0324, found 447.0331.

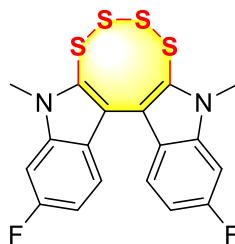

**3,12-Difluoro-5,10-dimethyl-5,10-dihydro-[1,2,3,4]tetrathiocino[5,6-*b*:8,7-*b''*]diindole (2t):** Purified by silica gel flash chromatography with petroleum ether and dichloromethane (40:1, v/v).

The **2t** was prepared as yellow solid following the general procedure in 73% yield (61.6 mg);  $^1\text{H}$  NMR (400 MHz,  $\text{CDCl}_3$ , ppm)  $\delta$  7.37 – 7.34 (m, 2H), 7.10 (dd,  $J = 9.6, 2.2$  Hz, 2H), 6.88 (td,  $J = 9.1, 2.2$  Hz, 2H), 3.96 (s, 6H);  $^{13}\text{C}$  NMR (100 MHz,  $\text{CDCl}_3$ , ppm)  $\delta$  161.6 (d,  $J = 242.5$  Hz), 137.6 (d,  $J = 12.2$  Hz), 128.4 (d,  $J = 3.5$  Hz), 123.1, 122.3 (d,  $J = 10.4$  Hz), 120.8, 109.8 (d,  $J = 25.1$  Hz), 96.5 (d,  $J = 26.4$  Hz), 30.9;  $^{19}\text{F}$  NMR (376 MHz,  $\text{CDCl}_3$ , ppm)  $\delta$  -115.9; HRMS calcd. for  $\text{C}_{18}\text{H}_{13}\text{F}_2\text{N}_2\text{S}_4^+$  ( $\text{M}+\text{H}$ ) $^+$  422.9924, found 422.9915.

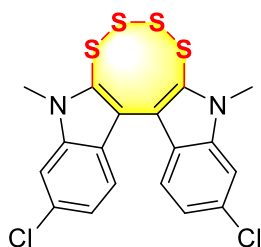

**3,12-Dichloro-5,10-dimethyl-5,10-dihydro-[1,2,3,4]tetrathiocino[5,6-*b*:8,7-*b'*]diindole (2u):**

Purified by silica gel flash chromatography with petroleum ether and dichloromethane (40:1, v/v).

The **2u** was prepared as yellow solid following the general procedure in 68% yield (61.8 mg);  $^1\text{H}$  NMR (400 MHz,  $\text{CDCl}_3$ , ppm)  $\delta$  7.44 (s, 2H), 7.32 (d,  $J = 8.5$  Hz, 2H), 7.07 (dd,  $J = 8.4, 1.7$  Hz, 2H), 3.97 (s, 6H);  $^{13}\text{C}$  NMR (100 MHz,  $\text{CDCl}_3$ , ppm)  $\delta$  137.7, 131.0, 129.0, 125.0, 121.9, 121.4, 120.4, 110.3, 30.9; HRMS calcd. for  $\text{C}_{18}\text{H}_{13}\text{Cl}_2\text{N}_2\text{S}_4^+$  ( $\text{M}+\text{H}$ ) $^+$  454.9333, found 454.9333.

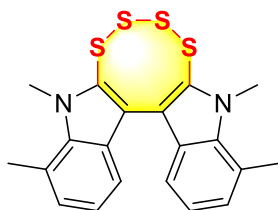

**4,5,10,11-Tetramethyl-5,10-dihydro-[1,2,3,4]tetrathiocino[5,6-*b*:8,7-*b'*]diindoleiazole (2v):**

Purified by silica gel flash chromatography with petroleum ether and dichloromethane (40:1, v/v).

The **2v** was prepared as yellow solid following the general procedure in 78% yield (64.6 mg);  $^1\text{H}$  NMR (400 MHz,  $\text{CDCl}_3$ , ppm)  $\delta$  7.21 – 7.15 (m, 2H), 6.99 (d,  $J = 7.2$  Hz, 2H), 6.87 (t,  $J = 7.5$  Hz, 2H), 4.24 (s, 6H), 2.79 (s, 6H);  $^{13}\text{C}$  NMR (100 MHz,  $\text{CDCl}_3$ , ppm)  $\delta$  136.6, 128.9, 127.5, 122.1, 121.8, 121.6, 120.4, 119.5, 33.8, 20.5; HRMS calcd. for  $\text{C}_{20}\text{H}_{18}\text{N}_2\text{NaS}_4^+$  ( $\text{M}+\text{Na}$ ) $^+$  437.0245, found 437.0248.

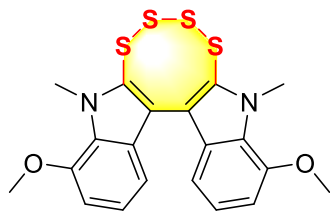

**4,11-Dimethoxy-5,10-dimethyl-5,10-dihydro-[1,2,3,4]tetrathiocino[5,6-*b*:8,7-*b'*]diindole (2w):**

Purified by silica gel flash chromatography with petroleum ether and dichloromethane (40:1, v/v). The **2w** was prepared as yellow solid following the general procedure in 65% yield (58.1 mg);  $^1\text{H}$  NMR (500 MHz,  $\text{CDCl}_3$ , ppm)  $\delta$  7.00 (d,  $J = 8.0$  Hz, 2H), 6.95 (t,  $J = 7.8$  Hz, 2H), 6.71 (d,  $J = 7.5$  Hz, 2H), 4.29 (s, 6H), 3.96 (s, 6H);  $^{13}\text{C}$  NMR (126 MHz,  $\text{CDCl}_3$ , ppm)  $\delta$  147.5, 128.7, 128.5, 127.6, 121.2, 120.5, 113.9, 104.7, 55.6, 34.0; HRMS calcd. for  $\text{C}_{20}\text{H}_{19}\text{N}_2\text{O}_2\text{NaS}_4^+$  ( $\text{M}+\text{H}$ ) $^+$  447.0324, found 447.0331.

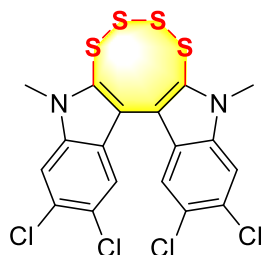

**2,3,12,13-Tetrachloro-5,10-dimethyl-5,10-dihydro-[1,2,3,4]tetrathiocino[5,6-*b*:8,7-*b'*]diindole (2x):**

Purified by silica gel flash chromatography with petroleum ether and dichloromethane (40:1, v/v). The **2x** was prepared as yellow solid following the general procedure in 72% yield (75.2 mg);  $^1\text{H}$  NMR (500 MHz,  $\text{CDCl}_3$ , ppm)  $\delta$  7.76 (s, 2H), 7.42 (s, 2H), 3.88 (s, 6H);  $^{13}\text{C}$  NMR (126 MHz,  $\text{CDCl}_3$ , ppm)  $\delta$  143.4, 135.2, 129.1, 128.3, 126.7, 121.6, 118.6, 112.2, 31.9; HRMS calcd. for  $\text{C}_{18}\text{H}_{10}\text{Cl}_4\text{KN}_2\text{S}_4^+$  ( $\text{M}+\text{K}$ ) $^+$  560.8113, found 560.8099.

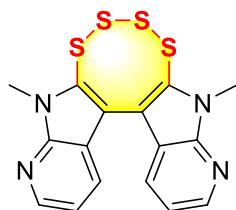

**5,10-Dimethyl-5,10-dihydro-[1,2,3,4]tetrathiocino[5,6-*b*:8,7-*b'*]bipyrrolo[2,3-*b*]pyridine (2y):**

Purified by silica gel flash chromatography with petroleum ether and dichloromethane (40:1, v/v).

The **2y** was prepared as yellow solid following the general procedure in 61% yield (47.3 mg);  $^1\text{H}$  NMR (400 MHz,  $\text{CDCl}_3$ , ppm)  $\delta$  8.54 – 8.50 (m, 2H), 7.73 (dd,  $J = 7.8, 1.7$  Hz, 2H), 7.14 – 7.06 (m, 2H), 4.11 (s, 6H);  $^{13}\text{C}$  NMR (100 MHz,  $\text{CDCl}_3$ , ppm)  $\delta$  147.7, 146.5, 128.9, 128.8, 119.5, 118.2, 116.8, 29.5; HRMS calcd. for  $\text{C}_{16}\text{H}_{13}\text{N}_4\text{S}_4^+$  ( $\text{M}+\text{H}$ ) $^+$  389.0018, found 389.0008.

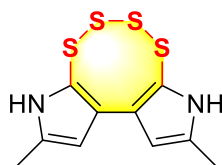

**2,9-Dimethyl-3,8-dihydro-[1,2,3,4]tetrathiocino[5,6-*b*:8,7-*b'*]dipyrrole (2z):** Purified by silica gel flash chromatography with petroleum ether and dichloromethane (4:1, v/v). The **2z** was prepared as yellow solid following the general procedure in 40% yield (22.9 mg);  $^1\text{H}$  NMR (500 MHz,  $\text{CDCl}_3$ , ppm)  $\delta$  8.34 (s, 2H), 6.20 (d,  $J = 2.9$  Hz, 2H), 2.22 (s, 6H);  $^{13}\text{C}$  NMR (126 MHz,  $\text{CDCl}_3$ , ppm)  $\delta$  129.7, 129.0, 128.1, 115.1, 13.2; HRMS calcd. for  $\text{C}_{10}\text{H}_{11}\text{N}_2\text{S}_4^+$  ( $\text{M}+\text{H}$ ) $^+$  286.9800, found 286.9808.

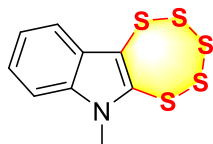

**6-Methyl-6H-[1,2,3,4,5]pentathiepiro[6,7-*b*]indole (3a, CAS: 371970-71-7)** <sup>[31]</sup>: Purified by silica gel flash chromatography with petroleum ether and dichloromethane (100:1, v/v). The **3a** was prepared as yellow solid following the general procedure in 71% yield (82.1 mg);  $^1\text{H}$  NMR (500 MHz,  $\text{CDCl}_3$ , ppm)  $\delta$  7.72 – 7.65 (m, 1H), 7.37 – 7.31 (m, 1H), 7.30 – 7.22 (m, 2H), 3.89 (s, 3H);  $^{13}\text{C}$  NMR (126 MHz,  $\text{CDCl}_3$ , ppm)  $\delta$  141.3, 136.6, 128.9, 124.7, 122.2, 120.6, 119.1, 110.5, 31.5; HRMS calcd. for  $\text{C}_9\text{H}_8\text{NS}_5^+$  ( $\text{M}+\text{H}$ ) $^+$  289.9255, found 289.9253.

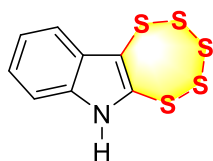

**6H-[1,2,3,4,5]pentathiepiro[6,7-*b*]indole (3b, CAS: 157984-19-5)** <sup>[31]</sup>: Purified by silica gel flash chromatography with petroleum ether and dichloromethane (6:1, v/v). The **3b** was prepared as a

yellow solid following the general procedure in 58% yield (63.9 mg);  $^1\text{H}$  NMR (500 MHz,  $\text{CDCl}_3$ , ppm)  $\delta$  8.61 (s, 1H), 7.68 (dd,  $J = 7.8, 1.4$  Hz, 1H), 7.35 – 7.31 (m, 2H), 7.30 – 7.27 (m, 1H).  $^{13}\text{C}$  NMR (126 MHz,  $\text{CDCl}_3$ , ppm)  $\delta$  137.8, 134.9, 129.8, 125.0, 122.3, 120.5, 120.3, 111.6; HRMS calcd. for  $\text{C}_8\text{H}_6\text{NS}_5^+$  ( $\text{M}+\text{H}$ ) $^+$  275.9098, found 275.9098.

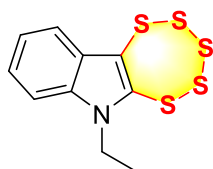

**6-Ethyl-6H-[1,2,3,4,5]pentathiepine[6,7-*b*]indole (3c):** Purified by silica gel flash chromatography with petroleum ether and dichloromethane (150:1, v/v). The **3c** was prepared as yellow solid following the general procedure in 78% yield (94.6 mg);  $^1\text{H}$  NMR (500 MHz,  $\text{CDCl}_3$ , ppm)  $\delta$  7.70 (d,  $J = 7.9$  Hz, 1H), 7.35 – 7.31 (m, 2H), 7.28 – 7.21 (m, 1H), 4.50 – 4.41 (m, 1H), 4.40 – 4.31 (m, 1H), 1.40 (t,  $J = 7.2$  Hz, 3H);  $^{13}\text{C}$  NMR (126 MHz,  $\text{CDCl}_3$ , ppm)  $\delta$  140.6, 135.5, 129.2, 124.6, 122.1, 120.8, 119.1, 110.4, 40.1, 16.2; HRMS calcd. for  $\text{C}_{10}\text{H}_{10}\text{NS}_5^+$  ( $\text{M}+\text{H}$ ) $^+$  303.9411, found 303.9418.

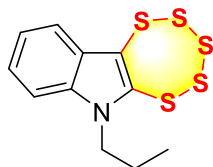

**6-Propyl-6H-[1,2,3,4,5]pentathiepine[6,7-*b*]indole (3d):** Purified by silica gel flash chromatography with petroleum ether and dichloromethane (200:1, v/v). The **3d** was prepared as yellow solid following the general procedure in 58% yield (73.6 mg);  $^1\text{H}$  NMR (500 MHz,  $\text{CDCl}_3$ , ppm)  $\delta$  7.70 (d,  $J = 8.0$  Hz, 1H), 7.31 (d,  $J = 3.5$  Hz, 2H), 7.28 – 7.24 (m, 1H), 4.40 – 4.33 (m, 1H), 4.31 – 4.24 (m, 1H), 1.86 – 1.77 (m, 2H), 0.94 (t,  $J = 7.4$  Hz, 3H);  $^{13}\text{C}$  NMR (126 MHz,  $\text{CDCl}_3$ , ppm)  $\delta$  141.2, 135.9, 129.1, 124.5, 122.0, 120.7, 119.0, 110.7, 46.7, 24.1, 11.4; HRMS calcd. for  $\text{C}_{11}\text{H}_{11}\text{NNaS}_5^+$  ( $\text{M}+\text{Na}$ ) $^+$  339.9387, found 339.9381.

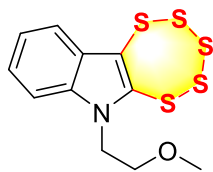

**6-(2-Methoxyethyl)-6H-[1,2,3,4,5]pentathiepine[6,7-*b*]indole (3f):** Purified by silica gel flash chromatography with petroleum ether and dichloromethane (10:1, v/v). The **3f** was prepared as yellow solid following the general procedure in 68% yield (90.7 mg);  $^1\text{H}$  NMR (500 MHz,  $\text{CDCl}_3$ , ppm)  $\delta$  7.70 (d,  $J = 7.9$  Hz, 1H), 7.38 – 7.29 (m, 2H), 7.29 – 7.23 (m, 1H), 4.63 – 4.46 (m, 2H), 3.64 (t,  $J = 5.6$  Hz, 2H), 3.26 (s, 3H);  $^{13}\text{C}$  NMR (126 MHz,  $\text{CDCl}_3$ , ppm)  $\delta$  141.8, 136.1, 129.1, 124.6, 122.1, 120.6, 119.1, 110.7, 71.4, 59.2, 44.9; HRMS calcd. for  $\text{C}_{11}\text{H}_{12}\text{NOS}_5^+$  ( $\text{M}+\text{H}$ ) $^+$  333.9517, found 333.9511.

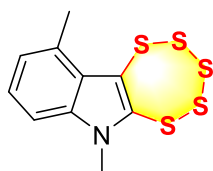

**6,10-Dimethyl-6H-[1,2,3,4,5]pentathiepine[6,7-*b*]indole (3j):** Purified by silica gel flash chromatography with petroleum ether and dichloromethane (100:1, v/v). The **3j** was prepared as yellow solid following the general procedure in 47% yield (57.2 mg);  $^1\text{H}$  NMR (500 MHz,  $\text{CDCl}_3$ , ppm)  $\delta$  7.23 – 7.19 (m, 1H), 7.13 (d,  $J = 8.3$  Hz, 1H), 6.95 (d,  $J = 7.1$  Hz, 1H), 3.88 (s, 3H), 2.78 (s, 3H);  $^{13}\text{C}$  NMR (126 MHz,  $\text{CDCl}_3$ , ppm)  $\delta$  142.1, 136.9, 132.1, 126.8, 125.0, 123.9, 119.6, 108.6, 31.7, 20.7; HRMS calcd. for  $\text{C}_{10}\text{H}_{10}\text{NS}_5^+$  ( $\text{M}+\text{H}$ ) $^+$  303.9411, found 303.9418.

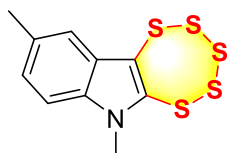

**6,9-Dimethyl-6H-[1,2,3,4,5]pentathiepine[6,7-*b*]indole (3l):** Purified by silica gel flash chromatography with petroleum ether and dichloromethane (100:1, v/v). The **3l** was prepared as yellow solid following the general procedure in 74% yield (89.8 mg);  $^1\text{H}$  NMR (500 MHz,  $\text{CDCl}_3$ , ppm)  $\delta$  7.45 (s, 1H), 7.16 – 7.13 (m, 2H), 3.84 (s, 3H), 2.47 (s, 3H);  $^{13}\text{C}$  NMR (126 MHz,  $\text{CDCl}_3$ , ppm)  $\delta$  141.0, 135.0, 131.8, 129.2, 126.5, 119.9, 118.4, 110.2, 31.5, 21.5; HRMS calcd. for  $\text{C}_{10}\text{H}_{10}\text{NS}_5^+$  ( $\text{M}+\text{H}$ ) $^+$  303.9411, found 303.9418.

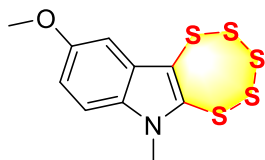

**9-Methoxy-6-methyl-6H-[1,2,3,4,5]pentathiepi[6,7-*b*]indole (3m):** Purified by silica gel flash chromatography with petroleum ether and dichloromethane (15:1, v/v). The **3m** was prepared as yellow solid following the general procedure in 68% yield (86.8 mg);  $^1\text{H}$  NMR (500 MHz,  $\text{CDCl}_3$ , ppm)  $\delta$  7.18 (d,  $J = 9.0$  Hz, 1H), 7.07 (d,  $J = 2.5$  Hz, 1H), 6.97 (dd,  $J = 9.0, 2.5$  Hz, 1H), 3.88 (s, 3H), 3.87 (s, 3H);  $^{13}\text{C}$  NMR (126 MHz,  $\text{CDCl}_3$ , ppm)  $\delta$  155.9, 141.1, 131.8, 129.7, 118.4, 116.1, 111.6, 100.6, 55.7, 31.7; HRMS calcd. for  $\text{C}_{10}\text{H}_9\text{NNaOS}_5^+$  ( $\text{M}+\text{H}$ ) $^+$  341.9180, found 341.9181.

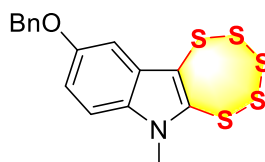

**9-(Benzyloxy)-6-methyl-6H-[1,2,3,4,5]pentathiepi[6,7-*b*]indole (3n):** Purified by silica gel flash chromatography with petroleum ether and dichloromethane (20:1, v/v). The **3n** was prepared as yellow solid following the general procedure in 62% yield (98.2 mg);  $^1\text{H}$  NMR (500 MHz,  $\text{CDCl}_3$ , ppm)  $\delta$  7.51 – 7.45 (m, 2H), 7.43 – 7.37 (m, 2H), 7.36 – 7.32 (m, 1H), 7.22 – 7.16 (m, 2H), 7.06 (dd,  $J = 9.0, 2.5$  Hz, 1H), 5.13 (s, 2H), 3.88 (s, 3H);  $^{13}\text{C}$  NMR (126 MHz,  $\text{CDCl}_3$ , ppm)  $\delta$  155.1, 141.3, 136.9, 132.0, 130.0, 128.6, 128.0, 127.7, 118.4, 116.6, 111.7, 102.2, 70.6 31.7; HRMS calcd. for  $\text{C}_{16}\text{H}_{14}\text{NOS}_5^+$  ( $\text{M}+\text{H}$ ) $^+$  395.9673, found 395.9659.

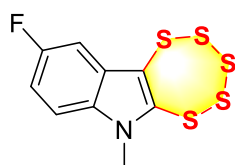

**9-Fluoro-6-methyl-6H-[1,2,3,4,5]pentathiepi[6,7-*b*]indole (3o):** Purified by silica gel flash chromatography with petroleum ether and dichloromethane (150:1, v/v). The **3o** was prepared as yellow solid following the general procedure in 80% yield (98.3 mg);  $^1\text{H}$  NMR (500 MHz,  $\text{CDCl}_3$ , ppm)  $\delta$  7.33 (dd,  $J = 8.9, 2.5$  Hz, 1H), 7.23 (dd,  $J = 9.0, 4.1$  Hz, 1H), 7.08 (td,  $J = 9.0, 2.5$  Hz, 1H), 3.90 (s, 3H);  $^{13}\text{C}$  NMR (126 MHz,  $\text{CDCl}_3$ , ppm)  $\delta$  159.1 (d,  $J = 239.8$  Hz), 142.8, 133.2, 129.5 (d,



$J = 10.4$  Hz), 118.8 (d,  $J = 3.6$  Hz), 113.7 (d,  $J = 26.8$  Hz), 111.7 (d,  $J = 9.3$  Hz), 105.4 (d,  $J = 24.5$  Hz), 31.8;  $^{19}\text{F}$  NMR (471 MHz,  $\text{CDCl}_3$ , ppm)  $\delta$  -119.9; HRMS calcd. for  $\text{C}_9\text{H}_7\text{FNS}_5^+$  ( $\text{M}+\text{H}$ ) $^+$  307.9161, found 307.9169.

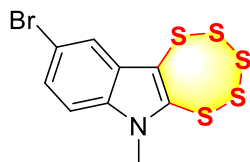

**9-Bromo-6-methyl-6H-[1,2,3,4,5]pentathiepine[6,7-b]indole (3q):** Purified by silica gel flash chromatography with petroleum ether and dichloromethane (100:1, v/v). The **3q** was prepared as yellow solid following the general procedure in 60% yield (88.2 mg);  $^1\text{H}$  NMR (500 MHz,  $\text{CDCl}_3$ , ppm)  $\delta$  7.57 (d,  $J = 8.5$  Hz, 1H), 7.28 (d,  $J = 1.7$  Hz, 1H), 7.21 (dd,  $J = 8.5, 1.8$  Hz, 1H), 3.85 (s, 3H);  $^{13}\text{C}$  NMR (126 MHz,  $\text{CDCl}_3$ , ppm)  $\delta$  142.1, 136.8, 130.9, 127.4, 123.0, 121.7, 119.5, 110.5, 31.7; HRMS calcd. for  $\text{C}_9\text{H}_7\text{BrNS}_5^+$  ( $\text{M}+\text{H}$ ) $^+$  367.8360, found 367.8359.

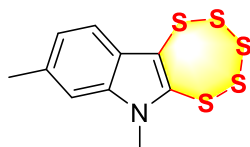

**6,8-Dimethyl-6H-[1,2,3,4,5]pentathiepine[6,7-b]indole (3r):** Purified by silica gel flash chromatography with petroleum ether and dichloromethane (150:1, v/v). The **3r** was prepared as yellow solid following the general procedure in 78% yield (94.6 mg);  $^1\text{H}$  NMR (500 MHz,  $\text{CDCl}_3$ , ppm)  $\delta$  7.54 (d,  $J = 8.1$  Hz, 1H), 7.10 – 7.07 (m, 2H), 3.85 (s, 3H), 2.49 (s, 3H);  $^{13}\text{C}$  NMR (126 MHz,  $\text{CDCl}_3$ , ppm)  $\delta$  140.5, 136.9, 135.0, 127.0, 124.1, 120.2, 119.2, 110.2, 31.4, 22.0; HRMS calcd. for  $\text{C}_{10}\text{H}_{10}\text{NS}_5^+$  ( $\text{M}+\text{H}$ ) $^+$  303.9411, found 303.9418.

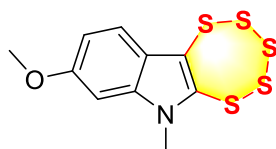

**8-Methoxy-6-methyl-6H-[1,2,3,4,5]pentathiepine[6,7-b]indole (3s):** Purified by silica gel flash chromatography with petroleum ether and dichloromethane (10:1, v/v). The **3s** was prepared as yellow solid following the general procedure in 61% yield (77.9 mg);  $^1\text{H}$  NMR (500 MHz,  $\text{CDCl}_3$ , ppm)  $\delta$  7.54 (d,  $J = 8.8$  Hz, 1H), 6.92 (d,  $J = 9.1$  Hz, 1H), 6.68 (s, 1H), 3.89 (s, 3H), 3.85 (s, 3H);

$^{13}\text{C}$  NMR (126 MHz,  $\text{CDCl}_3$ , ppm)  $\delta$  158.4, 139.5, 137.4, 123.4, 121.5, 119.8, 113.0, 92.9, 55.7, 31.5; HRMS calcd. for  $\text{C}_{10}\text{H}_9\text{NNaOS}_5^+$  ( $\text{M}+\text{H}$ ) $^+$  341.9180, found 341.9181.

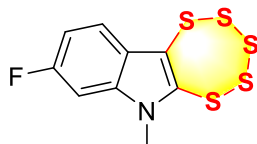

**8-Fluoro-6-methyl-6H-[1,2,3,4,5]pentathiepine[6,7-b]indole (3t):** Purified by silica gel flash chromatography with petroleum ether and dichloromethane (150:1, v/v). The **3t** was prepared as yellow solid following the general procedure in 71% yield (87.3 mg);  $^1\text{H}$  NMR (500 MHz,  $\text{CDCl}_3$ , ppm)  $\delta$  7.65 – 7.58 (m, 1H), 7.07 – 7.00 (m, 1H), 6.97 (dt,  $J = 9.4, 1.7$  Hz, 1H), 3.86 (s, 3H);  $^{13}\text{C}$  NMR (126 MHz,  $\text{CDCl}_3$ , ppm)  $\delta$  161.2 (d,  $J = 243.4$  Hz), 141.6 (d,  $J = 3.6$  Hz), 136.6 (d,  $J = 12.0$  Hz), 125.4, 122.0 (d,  $J = 10.3$  Hz), 119.6, 111.4 (d,  $J = 25.0$  Hz), 96.8 (d,  $J = 26.7$  Hz), 31.7;  $^{19}\text{F}$  NMR (471 MHz,  $\text{CDCl}_3$ , ppm)  $\delta$  -115.88; HRMS calcd. for  $\text{C}_9\text{H}_7\text{FNS}_5^+$  ( $\text{M}+\text{H}$ ) $^+$  307.9161, found 307.9169.

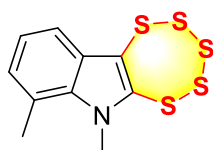

**6,7-Dimethyl-6H-[1,2,3,4,5]pentathiepine[6,7-b]indole (3v):** Purified by silica gel flash chromatography with petroleum ether and dichloromethane (150:1, v/v). The **3v** was prepared as yellow solid following the general procedure in 80% yield (97.1 mg);  $^1\text{H}$  NMR (500 MHz,  $\text{CDCl}_3$ , ppm)  $\delta$  7.52 (d,  $J = 8.0$  Hz, 1H), 7.10 (t,  $J = 7.6$  Hz, 1H), 7.01 (d,  $J = 7.2$  Hz, 1H), 4.17 (s, 3H), 2.74 (s, 3H);  $^{13}\text{C}$  NMR (126 MHz,  $\text{CDCl}_3$ , ppm)  $\delta$  142.0, 135.7, 129.8, 127.4, 122.1, 122.1, 119.4, 118.7, 34.9, 20.2; HRMS calcd. for  $\text{C}_{10}\text{H}_{10}\text{NS}_5^+$  ( $\text{M}+\text{H}$ ) $^+$  303.9411, found 303.9418.

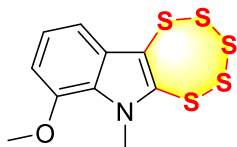

**7-Methoxy-6-methyl-6H-[1,2,3,4,5]pentathiepine[6,7-b]indole (3w):** Purified by silica gel flash chromatography with petroleum ether and dichloromethane (30:1, v/v). The **3w** was prepared as yellow solid following the general procedure in 75% yield (95.7 mg);  $^1\text{H}$  NMR (500 MHz,  $\text{CDCl}_3$ ,

ppm)  $\delta$  7.24 (d,  $J = 7.8$  Hz, 1H), 7.11 (t,  $J = 8.0$  Hz, 1H), 6.66 (d,  $J = 7.7$  Hz, 1H), 4.16 (s, 3H), 3.92 (s, 3H);  $^{13}\text{C}$  NMR (126 MHz,  $\text{CDCl}_3$ , ppm)  $\delta$  147.5, 141.8, 131.0, 126.7, 122.4, 119.2, 112.9, 104.5, 55.6, 35.1; HRMS calcd. for  $\text{C}_{10}\text{H}_{10}\text{NOS}_5^+$  ( $\text{M}+\text{H}$ ) $^+$  319.9360, found 319.9367.

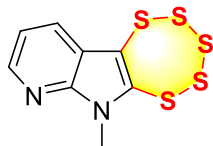

**6-Methyl-6H-[1,2,3,4,5]pentathiepine[6',7':4,5]pyrrolo[2,3-*b*]pyridine (3y):** Purified by silica gel flash chromatography with petroleum ether and dichloromethane (150:1, v/v). The **3y** was prepared as yellow solid following the general procedure in 46% yield (53.5 mg);  $^1\text{H}$  NMR (500 MHz,  $\text{CDCl}_3$ , ppm)  $\delta$  8.44 (dd,  $J = 4.6, 1.5$  Hz, 1H), 7.99 (dd,  $J = 7.9, 1.6$  Hz, 1H), 7.25 – 7.17 (m, 1H), 4.01 (s, 3H);  $^{13}\text{C}$  NMR (126 MHz,  $\text{CDCl}_3$ , ppm)  $\delta$  146.5, 146.1, 142.3, 128.9, 122.0, 118.2, 117.1, 30.2; HRMS calcd. for  $\text{C}_8\text{H}_7\text{N}_2\text{S}_5^+$  ( $\text{M}+\text{H}$ ) $^+$  290.9207, found 290.9203.

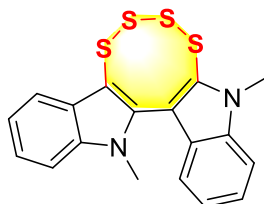

**9,14-Dimethyl-9,14-dihydro-[1,2,3,4]tetrathiocino[5,6-*b*:7,8-*b'*]diindole (4a):** Purified by silica gel flash chromatography with petroleum ether and dichloromethane (15:1, v/v). The **4a** was prepared as yellow solid following the general procedure in 63% yield (49.0 mg);  $^1\text{H}$  NMR (500 MHz,  $\text{CDCl}_3$ , ppm)  $\delta$  7.92 (d,  $J = 7.9$  Hz, 1H), 7.48 – 7.35 (m, 4H), 7.36 – 7.29 (m, 2H), 7.22 – 7.15 (m, 1H), 4.02 (s, 3H), 3.65 (s, 3H);  $^{13}\text{C}$  NMR (126 MHz,  $\text{CDCl}_3$ , ppm)  $\delta$  142.7, 137.8, 137.3, 131.7, 129.3, 126.4, 124.8, 123.4, 121.5, 121.4, 120.7, 119.7, 114.9, 110.8, 109.8, 108.7, 31.9, 30.8; HRMS calcd. for  $\text{C}_{18}\text{H}_{15}\text{N}_2\text{S}_4^+$  ( $\text{M}+\text{H}$ ) $^+$  387.0113, found 387.0117.

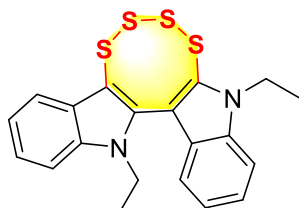

**9,14-Dipropyl-9,14-dihydro-[1,2,3,4]tetrathiocino[5,6-*b*:7,8-*b'*]diindole (4c):** Purified by silica gel flash chromatography with petroleum ether and dichloromethane (15:1, v/v). The **4c** was prepared as yellow solid following the general procedure in 74% yield (61.3 mg);  $^1\text{H}$  NMR (500 MHz,  $\text{CDCl}_3$ , ppm)  $\delta$  7.93 (d,  $J = 7.4$  Hz, 1H), 7.50 – 7.43 (m, 2H), 7.40 – 7.35 (m, 3H), 7.34 – 7.29 (m, 1H), 7.17 (t,  $J = 7.5$  Hz, 1H), 4.69 – 4.43 (m, 2H), 4.27 – 4.00 (m, 2H), 1.51 (t,  $J = 7.2$  Hz, 3H), 1.14 (t,  $J = 7.2$  Hz, 3H);  $^{13}\text{C}$  NMR (126 MHz,  $\text{CDCl}_3$ , ppm)  $\delta$  141.9, 136.6, 136.3, 131.5, 129.6, 126.5, 124.7, 123.3, 121.3, 121.2, 120.7, 119.8, 115.0, 110.7, 110.0, 109.5, 40.2, 39.2, 15.6, 15.6; HRMS calcd. for  $\text{C}_{20}\text{H}_{18}\text{N}_2\text{NaS}_4^+$  ( $\text{M}+\text{Na}$ ) $^+$  437.0245, found 437.0248.

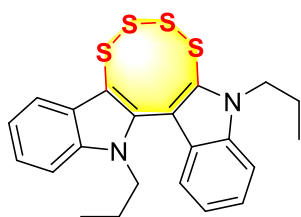

**9,14-Dipropyl-9,14-dihydro-[1,2,3,4]tetrathiocino[5,6-*b*:7,8-*b'*]diindole (4d):** Purified by silica gel flash chromatography with petroleum ether and dichloromethane (15:1, v/v). The **4d** was prepared as yellow solid following the general procedure in 63% yield (55.8 mg);  $^1\text{H}$  NMR (500 MHz,  $\text{CDCl}_3$ , ppm)  $\delta$  7.92 (d,  $J = 7.1$  Hz, 1H), 7.52 – 7.42 (m, 2H), 7.39 – 7.29 (m, 4H), 7.16 (t,  $J = 7.5$  Hz, 1H), 4.55 – 4.37 (m, 2H), 4.24 – 3.87 (m, 2H), 1.95 (q,  $J = 7.5$  Hz, 2H), 1.58 (q,  $J = 7.4$  Hz, 2H), 1.01 (t,  $J = 7.4$  Hz, 3H), 0.61 (t,  $J = 7.4$  Hz, 3H);  $^{13}\text{C}$  NMR (126 MHz,  $\text{CDCl}_3$ , ppm)  $\delta$  142.3, 136.9, 136.6, 132.0, 129.6, 126.3, 124.6, 123.2, 121.3, 121.8, 120.6, 119.8, 115.1, 111.0, 110.2, 109.4, 46.8, 45.9, 23.7, 23.0, 11.5, 11.3; HRMS calcd. for  $\text{C}_{22}\text{H}_{23}\text{N}_2\text{S}_4^+$  ( $\text{M}+\text{H}$ ) $^+$  443.0739, found 443.0746.

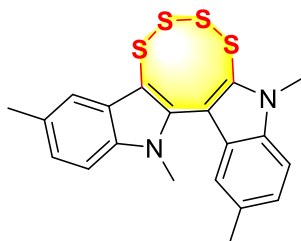

**3,9,12,14-Tetramethyl-9,14-dihydro-[1,2,3,4]tetrathiocino[5,6-*b*:8,7-*b'*]diindole (4l):** Purified by silica gel flash chromatography with petroleum ether and dichloromethane (15:1, v/v). The **4l** was prepared as yellow solid following the general procedure in 63% yield (52.3 mg);  $^1\text{H}$  NMR

(500 MHz, CDCl<sub>3</sub>, ppm)  $\delta$  7.70 (s, 1H), 7.32 (t,  $J$  = 7.8 Hz, 2H), 7.23 – 7.17 (m, 2H), 7.08 (s, 1H), 3.98 (s, 3H), 3.63 (s, 3H), 2.54 (s, 3H), 2.40 (s, 3H); <sup>13</sup>C NMR (126 MHz, CDCl<sub>3</sub>, ppm)  $\delta$  142.9, 136.2, 135.8, 131.5, 131.1, 130.9, 129.5, 126.7, 126.7, 124.9, 120.0, 119.4, 114.5, 110.5, 109.5, 108.1, 32.0, 30.8, 21.6, 21.5; HRMS calcd. for C<sub>20</sub>H<sub>18</sub>KN<sub>2</sub>S<sub>4</sub><sup>+</sup> (M+K)<sup>+</sup> 452.9984, found 452.9989.

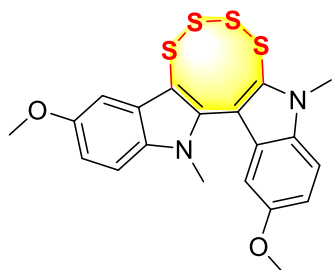

**3,12-Dimethoxy-9,14-dimethyl-9,14-dihydro-[1,2,3,4]tetrathiocino[5,6-*b*:8,7-*b'*]diindole (4m):**

Purified by silica gel flash chromatography with petroleum ether and dichloromethane (8:1, v/v). The **4m** was prepared as yellow solid following the general procedure in 59% yield (52.7 mg); <sup>1</sup>H NMR (500 MHz, CDCl<sub>3</sub>, ppm)  $\delta$  7.37 – 7.30 (m, 3H), 7.06 – 7.03 (m, 2H), 6.67 (s, 1H), 4.00 (s, 3H), 3.96 (s, 3H), 3.75 (s, 3H), 3.64 (s, 3H); <sup>13</sup>C NMR (126 MHz, CDCl<sub>3</sub>, ppm)  $\delta$  155.7, 155.5, 143.1, 132.9, 132.6, 131.8, 130.0, 126.8, 116.1, 114.4, 113.8, 111.8, 110.7, 108.2, 101.1, 101.0, 56.0, 55.9, 31.9, 30.9; HRMS calcd. for C<sub>20</sub>H<sub>18</sub>N<sub>2</sub>NaO<sub>2</sub>S<sub>4</sub><sup>+</sup> (M+Na)<sup>+</sup> 469.0143, found 469.0151.

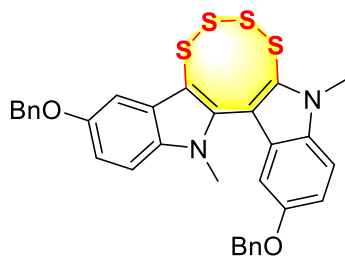

**3,12-Bis(benzyloxy)-9,14-dimethyl-9,14-dihydro-[1,2,3,4]tetrathiocino[5,6-*b*:7,8-*b'*]diindole**

**(4n):** Purified by silica gel flash chromatography with petroleum ether and dichloromethane (15:1, v/v). The **4n** was prepared as yellow solid following the general procedure in 52% yield (62.3 mg); <sup>1</sup>H NMR (500 MHz, CDCl<sub>3</sub>, ppm)  $\delta$  7.52 (d,  $J$  = 7.5 Hz, 2H), 7.47 (s, 1H), 7.44 – 7.28 (m, 10H), 7.17 – 7.07 (m, 2H), 6.72 (s, 1H), 5.21 – 5.20 (m, 2H), 5.00 (q,  $J$  = 11.8 Hz, 2H), 4.00 (s, 3H), 3.48 (s, 3H); <sup>13</sup>C NMR (126 MHz, CDCl<sub>3</sub>, ppm)  $\delta$  154.8, 154.4, 143.1, 137.5, 137.1, 133.1, 132.7, 131.8, 130.0, 128.6, 128.6, 127.9, 127.9, 127.7, 127.4, 126.7, 116.7, 114.5, 114.4, 111.8, 110.7, 108.1, 102.8, 102.7, 71.0, 70.7, 31.8, 30.9; HRMS calcd. for C<sub>32</sub>H<sub>27</sub>N<sub>2</sub>O<sub>2</sub>S<sub>4</sub><sup>+</sup> (M+H)<sup>+</sup> 599.0950, found 599.0948.

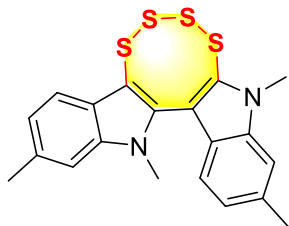

**2,9,11,14-Tetramethyl-9,14-dihydro-[1,2,3,4]tetrathiocino[5,6-*b*:7,8-*b'*]diindole (4r):** Purified by silica gel flash chromatography with petroleum ether and dichloromethane (15:1, v/v). The **4r** was prepared as yellow solid following the general procedure in 71% yield (58.9 mg);  $^1\text{H}$  NMR (500 MHz,  $\text{CDCl}_3$ , ppm)  $\delta$  7.78 (d,  $J = 8.1$  Hz, 1H), 7.22 (d,  $J = 7.4$  Hz, 2H), 7.16 (dd,  $J = 17.7$ , 8.8 Hz, 2H), 7.02 – 7.00 (m, 1H), 3.96 (s, 3H), 3.60 (s, 3H), 2.55 (s, 3H), 2.52 (s, 3H);  $^{13}\text{C}$  NMR (126 MHz,  $\text{CDCl}_3$ , ppm)  $\delta$  142.3, 138.1, 137.6, 135.0, 133.3, 130.8, 127.1, 124.4, 123.4, 123.0, 120.3, 119.3, 115.0, 110.5, 109.7, 108.3, 31.8, 30.6, 26.9, 22.0; HRMS calcd. for  $\text{C}_{20}\text{H}_{18}\text{KN}_2\text{S}_4^+$  ( $\text{M}+\text{K}$ ) $^+$  452.9984, found 452.9989.

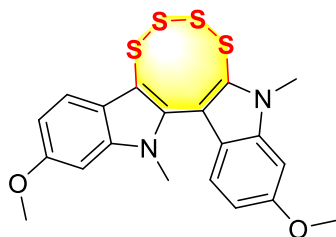

**2,11-Dimethoxy-9,14-dimethyl-9,14-dihydro-[1,2,3,4]tetrathiocino[5,6-*b*:7,8-*b'*]diindole (4s):** Purified by silica gel flash chromatography with petroleum ether and dichloromethane (6:1, v/v). The **4s** was prepared as yellow solid following the general procedure in 58% yield (51.8 mg);  $^1\text{H}$  NMR (500 MHz,  $\text{CDCl}_3$ , ppm)  $\delta$  7.78 (d,  $J = 8.6$  Hz, 1H), 7.20 (d,  $J = 8.6$  Hz, 1H), 6.99 – 6.93 (m, 1H), 6.88 – 6.85 (m, 3H), 3.97 (s, 3H), 3.92 (s, 3H), 3.92 (s, 3H), 3.61 (s, 3H).;  $^{13}\text{C}$  NMR (126 MHz,  $\text{CDCl}_3$ , ppm)  $\delta$  158.6, 157.6, 141.8, 138.5, 138.3, 130.0, 123.5, 121.6, 120.9, 120.4, 115.6, 112.3, 111.0, 108.4, 93.5, 93.2, 55.9, 55.7, 31.9, 30.7; HRMS calcd. for  $\text{C}_{20}\text{H}_{18}\text{N}_2\text{NaO}_2\text{S}_4^+$  ( $\text{M}+\text{Na}$ ) $^+$  469.0143, found 469.0151.

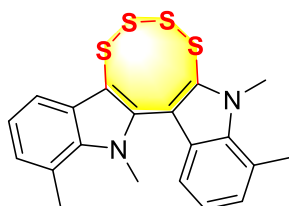

**1,9,10,14-Tetramethyl-9,14-dihydro-[1,2,3,4]tetrathiocino[5,6-*b*:7,8-*b'*]diindole (4v):** Purified by silica gel flash chromatography with petroleum ether and dichloromethane (15:1, v/v). The **4v** was prepared as yellow solid following the general procedure in 60% yield (49.7 mg); <sup>1</sup>H NMR (500 MHz, CDCl<sub>3</sub>, ppm) δ 7.76 (d, *J* = 7.9 Hz, 1H), 7.19 – 7.12 (m, 2H), 7.09 – 7.05 (m, 3H), 4.32 (s, 3H), 3.88 (s, 3H), 2.86 (s, 3H), 2.84 (s, 3H); <sup>13</sup>C NMR (126 MHz, CDCl<sub>3</sub>, ppm) δ 143.7, 136.7, 136.5, 132.4, 130.2, 127.6, 127.4, 126.4, 122.3, 121.7, 121.6, 121.4, 118.9, 117.9, 115.7, 109.0, 35.3, 33.9, 20.5, 20.1; HRMS calcd. for C<sub>20</sub>H<sub>18</sub>KN<sub>2</sub>S<sub>4</sub><sup>+</sup> (M+K)<sup>+</sup> 452.9984, found 452.9989.

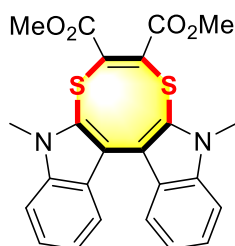

**Dimethyl-(*Z*)-5,10-dimethyl-5,10-dihydro-[1,4]dithiocino[5,6-*b*:8,7-*b'*]diindole-7,8-dicarboxylate (5):** A solution of triphenylphosphine (4 mmol) in dichloromethane (3 mL) was added dropwise to a stirred solution of **2a** (1 mmol) and dimethyl but-2-ynedioate (3 mmol) in dichloromethane (10 mL). The reaction vessel was stirred at 50 °C for 4 h under an air atmosphere, solvent was evaporated under reduced pressure. The residue was purified by column chromatography on silica gel (petroleum ether/ ethyl acetate = 5:1) to yield the desired product **5** as a yellowish solid (63% yield).

<sup>1</sup>H NMR (500 MHz, CDCl<sub>3</sub>, ppm) δ 7.72 (d, *J* = 7.9 Hz, 2H), 7.46 (d, *J* = 8.4 Hz, 2H), 7.41 – 7.34 (m, 2H), 7.22 – 7.17 (m, 2H), 3.99 (s, 6H), 3.86 (s, 6H); <sup>13</sup>C NMR (126 MHz, CDCl<sub>3</sub>, ppm) δ 166.0, 138.9, 132.6, 125.3, 124.2, 121.8, 120.8, 120.6, 120.5, 110.5, 53.4, 31.0.

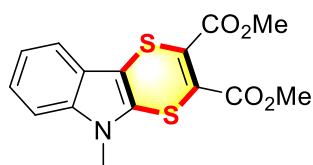

**Dimethyl 5-methyl-5H-[1,4]dithiino[2,3-*b*]indole-2,3-dicarboxylate (6, CAS: 913618-45-8) [5]:**

A solution of triphenylphosphine (4 mmol) in dichloromethane (3 mL) was added dropwise to a stirred solution of **3a** (1 mmol) and dimethyl but-2-ynedioate (3 mmol) in dichloromethane (10

mL) at room temperature. The reaction mixture was stirred for 1 h, solvent was evaporated under reduced pressure. The residue was purified by column chromatography on silica gel (petroleum ether/ ethyl acetate = 8:1) to yield the desired product **6** as a red solid (85% yield).

<sup>1</sup>H NMR (500 MHz, CDCl<sub>3</sub>, ppm) δ 7.45 (d, *J* = 7.9 Hz, 1H), 7.27 – 7.20 (m, 2H), 7.17 – 7.11 (m, 1H), 3.85 (s, 3H), 3.83 (s, 3H), 3.72 (s, 3H); <sup>13</sup>C NMR (126 MHz, CDCl<sub>3</sub>, ppm) δ 163.9, 162.4, 140.6, 140.5, 130.1, 128.0, 124.9, 122.7, 120.7, 117.7, 109.8, 102.5, 53.3, 30.8.

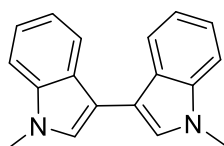

**1,1'-Dimethyl-1H,1'H-3,3'-biindole (7, CAS: 13637-39-3)**<sup>[6]</sup>: The reaction was conducted with 1-methylindole **1a** (0.4 mmol), S<sub>8</sub> (51.2 mg, 0.2 mmol), HI (12 μL, 0.04 mmol, 20 mol %), DMSO (60.0 μL, 0.8 mmol), 2-picoline (60.0 μL, 0.6 mmol), and 1,4-dioxane (1 mL) were added successfully to a 10 mL oven-dried reaction vessel. The reaction vessel was stirred at 150 °C for 1 h under an air atmosphere. After cooling to room temperature, the reaction was diluted with dichloromethane 8 mL and the volatiles were removed under reduced pressure. The residue was purified by column chromatography on silica gel (petroleum ether/ ethyl acetate = 15:1) to yield the desired product **7** as white solid (13% yield).

<sup>1</sup>H NMR (400 MHz, CDCl<sub>3</sub>, ppm) δ 7.92 – 7.75 (m, 2H), 7.40 – 7.34 (m, 2H), 7.33 – 7.23 (m, 4H), 7.19 – 7.12 (m, 2H), 3.84 (s, 6H); <sup>13</sup>C NMR (100 MHz, CDCl<sub>3</sub>, ppm) δ 137.1, 127.1, 126.0, 121.8, 120.2, 119.2, 109.5, 109.3, 32.8.

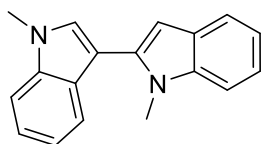

**1,1'-Dimethyl-1H,1'H-2,3'-biindole (8, CAS: 63955-66-8)**<sup>[1b]</sup>: The reaction was conducted with 1-methylindole **1a** (0.4 mmol), S<sub>8</sub> (51.2 mg, 0.2 mmol), HI (12 μL, 0.04 mmol, 20 mol %), 2-picoline (60.0 μL, 0.6 mmol), and 1,2-dichlorobenzene (1 mL) were added successfully to a 10 mL oven-dried reaction vessel. The reaction vessel was stirred at 150 °C for 1 h under an air atmosphere. After cooling to room temperature, the reaction was diluted with dichloromethane 8



mL and the volatiles were removed under reduced pressure. The residue was purified by column chromatography on silica gel (petroleum ether/ ethyl acetate = 10:1) to yield the desired product **8** as white solid (8% yield).

<sup>1</sup>H NMR (500 MHz, CDCl<sub>3</sub>, ppm)  $\delta$  7.66 (dd,  $J$  = 30.5, 7.9 Hz, 2H), 7.35 (t,  $J$  = 7.8 Hz, 2H), 7.31 – 7.27 (m, 1H), 7.24 – 7.10 (m, 4H), 6.61 (s, 1H), 3.80 (s, 3H), 3.71 (s, 3H); <sup>13</sup>C NMR (126 MHz, CDCl<sub>3</sub>, ppm)  $\delta$  138.0, 136.9, 135.2, 128.4, 128.4, 127.6, 122.3, 121.0, 120.3, 120.2, 120.0, 119.5, 109.5, 109.3, 107.3, 101.2, 32.9, 30.9.

## 7. References

- [1] (a) P. Huang, X. Peng, D. Hu, H. Liao, S. Tang and L. X. Liu, *Org. Biomol. Chem.*, 2017, **15**, 9622-9629; (b) Y.-X. Li, K.-G. Ji, H.-X. Wang, S. Ali and Y.-M. Liang, *J. Org. Chem.*, 2011, **76**, 744-747.
- [2] J. T. Stoffel, K. T. Riordan and E. Y. Tsui, *Chem. Commun.*, 2021, **57**, 12488-12491.
- [3] G. W. Rewcastle, T. Janosik and J. Bergman, *Tetrahedron*, 2001, **57**, 7185-7189.
- [4] T. Janosik, J. Bergman, B. Stensland and Claes. Stalhandsked, *J. Chem. Soc., Perkin Trans. I*, 2002, 330-334.
- [5] S. A. Amelichev, L. S. Konstantinova, N. V. Obruchnikova, O. A. Rakitin and C. W. Rees, *Org. Lett.*, 2006, **8**, 4529-4532.
- [6] Y. Li, W.-H. Wang, S.-D. Yang, B.-J. Li, C. Feng and Z.-J. Shi, *Chem. Commun.*, 2010, **46**, 4553-4555.

## 8. Crystal data and structure refinement for 4a

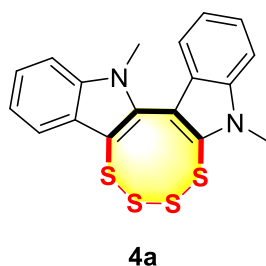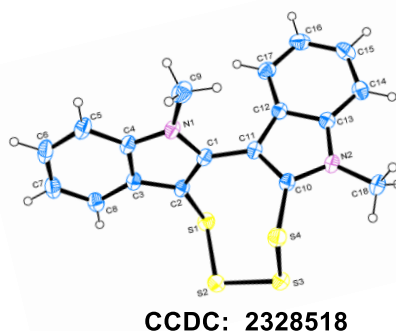

Table 1. Crystal data and structure refinement for **4a**.

|                                   |                                                               |          |
|-----------------------------------|---------------------------------------------------------------|----------|
| Identification code               | <b>4a</b>                                                     |          |
| Empirical formula                 | C <sub>18</sub> H <sub>14</sub> N <sub>2</sub> S <sub>4</sub> |          |
| Formula weight                    | 386.55                                                        |          |
| Temperature                       | 296(2) K                                                      |          |
| Wavelength                        | 0.71073 Å                                                     |          |
| Crystal system                    | Orthorhombic                                                  |          |
| Space group                       | Pbca                                                          |          |
| Unit cell dimensions              | a = 10.1086(5) Å                                              | α = 90 ° |
|                                   | b = 15.8046(8) Å                                              | β = 90 ° |
|                                   | c = 22.2013(10) Å                                             | γ = 90 ° |
| Volume                            | 3546.9(3) Å <sup>3</sup>                                      |          |
| Z                                 | 8                                                             |          |
| Density (calculated)              | 1.448 Mg/m <sup>3</sup>                                       |          |
| Absorption coefficient            | 0.537 mm <sup>-1</sup>                                        |          |
| F(000)                            | 1600                                                          |          |
| Crystal size                      | 0.220 x 0.180 x 0.180 mm <sup>3</sup>                         |          |
| Theta range for data collection   | 1.835 to 28.864 °                                             |          |
| Index ranges                      | -13 ≤ h ≤ 13, -20 ≤ k ≤ 21, -30 ≤ l ≤ 18                      |          |
| Reflections collected             | 22226                                                         |          |
| Independent reflections           | 4594 [R(int) = 0.0340]                                        |          |
| Completeness to theta = 25.242 °  | 100.0 %                                                       |          |
| Absorption correction             | Semi-empirical from equivalents                               |          |
| Refinement method                 | Full-matrix least-squares on F <sup>2</sup>                   |          |
| Data / restraints / parameters    | 4594 / 0 / 219                                                |          |
| Goodness-of-fit on F <sup>2</sup> | 1.026                                                         |          |
| Final R indices [I > 2σ(I)]       | R1 = 0.0376, wR2 = 0.0883                                     |          |
| R indices (all data)              | R1 = 0.0616, wR2 = 0.1003                                     |          |

|                             |                                    |
|-----------------------------|------------------------------------|
| Extinction coefficient      | n/a                                |
| Largest diff. peak and hole | 0.244 and -0.217 e.Å <sup>-3</sup> |

Table 2. Atomic coordinates ( $\times 10^4$ ) and equivalent isotropic displacement parameters ( $\text{\AA}^2 \times 10^3$ ) for **4a**.  $U(\text{eq})$  is defined as one third of the trace of the orthogonalized  $U^{ij}$  tensor.

|       | x       | y       | z       | U(eq) |
|-------|---------|---------|---------|-------|
| S(4)  | 3199(1) | 2018(1) | 5178(1) | 49(1) |
| S(3)  | 1940(1) | 985(1)  | 5177(1) | 57(1) |
| S(2)  | 356(1)  | 1334(1) | 4660(1) | 55(1) |
| S(1)  | 1048(1) | 1372(1) | 3783(1) | 47(1) |
| N(1)  | 3057(2) | 3469(1) | 3561(1) | 41(1) |
| N(2)  | 5364(2) | 1378(1) | 4588(1) | 38(1) |
| C(6)  | 148(3)  | 4675(2) | 3033(1) | 60(1) |
| C(5)  | 1462(2) | 4557(1) | 3168(1) | 52(1) |
| C(4)  | 1828(2) | 3756(1) | 3375(1) | 40(1) |
| C(1)  | 2934(2) | 2647(1) | 3756(1) | 37(1) |
| C(11) | 4061(2) | 2167(1) | 3981(1) | 38(1) |
| C(12) | 5207(2) | 1912(1) | 3648(1) | 38(1) |
| C(13) | 5986(2) | 1421(1) | 4040(1) | 37(1) |
| C(14) | 7171(2) | 1051(1) | 3855(1) | 46(1) |
| C(15) | 7562(2) | 1192(1) | 3271(1) | 53(1) |
| C(3)  | 914(2)  | 3101(1) | 3446(1) | 38(1) |
| C(2)  | 1635(2) | 2393(1) | 3687(1) | 38(1) |
| C(10) | 4197(2) | 1834(1) | 4553(1) | 38(1) |
| C(18) | 5927(2) | 997(1)  | 5127(1) | 46(1) |
| C(16) | 6810(2) | 1685(2) | 2876(1) | 54(1) |
| C(17) | 5635(2) | 2045(1) | 3056(1) | 47(1) |
| C(9)  | 4228(2) | 3993(1) | 3612(1) | 58(1) |
| C(8)  | -415(2) | 3240(1) | 3302(1) | 46(1) |
| C(7)  | -775(2) | 4030(2) | 3098(1) | 56(1) |

Table 3. Bond lengths [ $\text{\AA}$ ] and angles [ $^\circ$ ] for **4a**.

|            |            |
|------------|------------|
| S(4)-C(10) | 1.7409(19) |
| S(4)-S(3)  | 2.0690(9)  |

|              |            |
|--------------|------------|
| S(3)-S(2)    | 2.0467(8)  |
| S(2)-S(1)    | 2.0686(8)  |
| S(1)-C(2)    | 1.7332(19) |
| N(1)-C(1)    | 1.375(2)   |
| N(1)-C(4)    | 1.386(2)   |
| N(1)-C(9)    | 1.449(3)   |
| N(2)-C(13)   | 1.371(2)   |
| N(2)-C(10)   | 1.385(2)   |
| N(2)-C(18)   | 1.455(2)   |
| C(6)-C(5)    | 1.374(3)   |
| C(6)-C(7)    | 1.390(3)   |
| C(6)-H(6)    | 0.9300     |
| C(5)-C(4)    | 1.397(3)   |
| C(5)-H(5)    | 0.9300     |
| C(4)-C(3)    | 1.396(3)   |
| C(1)-C(2)    | 1.382(3)   |
| C(1)-C(11)   | 1.457(2)   |
| C(11)-C(10)  | 1.381(3)   |
| C(11)-C(12)  | 1.433(3)   |
| C(12)-C(17)  | 1.399(3)   |
| C(12)-C(13)  | 1.409(2)   |
| C(13)-C(14)  | 1.394(3)   |
| C(14)-C(15)  | 1.374(3)   |
| C(14)-H(14)  | 0.9300     |
| C(15)-C(16)  | 1.398(3)   |
| C(15)-H(15)  | 0.9300     |
| C(3)-C(8)    | 1.398(3)   |
| C(3)-C(2)    | 1.439(2)   |
| C(18)-H(18A) | 0.9600     |
| C(18)-H(18B) | 0.9600     |
| C(18)-H(18C) | 0.9600     |
| C(16)-C(17)  | 1.376(3)   |
| C(16)-H(16)  | 0.9300     |
| C(17)-H(17)  | 0.9300     |
| C(9)-H(9A)   | 0.9600     |
| C(9)-H(9B)   | 0.9600     |
| C(9)-H(9C)   | 0.9600     |
| C(8)-C(7)    | 1.378(3)   |

|                   |            |
|-------------------|------------|
| C(8)-H(8)         | 0.9300     |
| C(7)-H(7)         | 0.9300     |
| C(10)-S(4)-S(3)   | 102.94(7)  |
| S(2)-S(3)-S(4)    | 105.63(3)  |
| S(3)-S(2)-S(1)    | 105.71(3)  |
| C(2)-S(1)-S(2)    | 104.99(7)  |
| C(1)-N(1)-C(4)    | 108.75(16) |
| C(1)-N(1)-C(9)    | 126.12(16) |
| C(4)-N(1)-C(9)    | 124.70(16) |
| C(13)-N(2)-C(10)  | 108.34(15) |
| C(13)-N(2)-C(18)  | 124.81(16) |
| C(10)-N(2)-C(18)  | 126.49(16) |
| C(5)-C(6)-C(7)    | 121.8(2)   |
| C(5)-C(6)-H(6)    | 119.1      |
| C(7)-C(6)-H(6)    | 119.1      |
| C(6)-C(5)-C(4)    | 116.8(2)   |
| C(6)-C(5)-H(5)    | 121.6      |
| C(4)-C(5)-H(5)    | 121.6      |
| N(1)-C(4)-C(3)    | 108.50(16) |
| N(1)-C(4)-C(5)    | 129.18(19) |
| C(3)-C(4)-C(5)    | 122.28(19) |
| N(1)-C(1)-C(2)    | 109.03(16) |
| N(1)-C(1)-C(11)   | 121.94(17) |
| C(2)-C(1)-C(11)   | 129.03(17) |
| C(10)-C(11)-C(12) | 106.71(16) |
| C(10)-C(11)-C(1)  | 126.28(17) |
| C(12)-C(11)-C(1)  | 126.94(17) |
| C(17)-C(12)-C(13) | 119.41(18) |
| C(17)-C(12)-C(11) | 133.91(18) |
| C(13)-C(12)-C(11) | 106.67(16) |
| N(2)-C(13)-C(14)  | 129.41(17) |
| N(2)-C(13)-C(12)  | 108.69(16) |
| C(14)-C(13)-C(12) | 121.89(18) |
| C(15)-C(14)-C(13) | 117.26(19) |
| C(15)-C(14)-H(14) | 121.4      |
| C(13)-C(14)-H(14) | 121.4      |
| C(14)-C(15)-C(16) | 121.7(2)   |
| C(14)-C(15)-H(15) | 119.2      |

|                     |            |
|---------------------|------------|
| C(16)-C(15)-H(15)   | 119.2      |
| C(4)-C(3)-C(8)      | 119.64(17) |
| C(4)-C(3)-C(2)      | 106.48(16) |
| C(8)-C(3)-C(2)      | 133.85(19) |
| C(1)-C(2)-C(3)      | 107.24(16) |
| C(1)-C(2)-S(1)      | 125.60(14) |
| C(3)-C(2)-S(1)      | 126.68(15) |
| C(11)-C(10)-N(2)    | 109.58(16) |
| C(11)-C(10)-S(4)    | 127.74(15) |
| N(2)-C(10)-S(4)     | 122.38(14) |
| N(2)-C(18)-H(18A)   | 109.5      |
| N(2)-C(18)-H(18B)   | 109.5      |
| H(18A)-C(18)-H(18B) | 109.5      |
| N(2)-C(18)-H(18C)   | 109.5      |
| H(18A)-C(18)-H(18C) | 109.5      |
| H(18B)-C(18)-H(18C) | 109.5      |
| C(17)-C(16)-C(15)   | 121.2(2)   |
| C(17)-C(16)-H(16)   | 119.4      |
| C(15)-C(16)-H(16)   | 119.4      |
| C(16)-C(17)-C(12)   | 118.53(19) |
| C(16)-C(17)-H(17)   | 120.7      |
| C(12)-C(17)-H(17)   | 120.7      |
| N(1)-C(9)-H(9A)     | 109.5      |
| N(1)-C(9)-H(9B)     | 109.5      |
| H(9A)-C(9)-H(9B)    | 109.5      |
| N(1)-C(9)-H(9C)     | 109.5      |
| H(9A)-C(9)-H(9C)    | 109.5      |
| H(9B)-C(9)-H(9C)    | 109.5      |
| C(7)-C(8)-C(3)      | 118.1(2)   |
| C(7)-C(8)-H(8)      | 121.0      |

---

Symmetry transformations used to generate equivalent atoms:

Table 4. Anisotropic displacement parameters ( $\text{\AA}^2 \times 10^3$ ) for **4a**. The anisotropic displacement factor exponent takes the form:  $-2\pi^2 [ h^2 a^{*2} U^{11} + \dots + 2 h k a^* b^* U^{12} ]$

---

| U <sup>11</sup> | U <sup>22</sup> | U <sup>33</sup> | U <sup>23</sup> | U <sup>13</sup> | U <sup>12</sup> |
|-----------------|-----------------|-----------------|-----------------|-----------------|-----------------|
|-----------------|-----------------|-----------------|-----------------|-----------------|-----------------|

---

|       |       |       |       |       |        |        |
|-------|-------|-------|-------|-------|--------|--------|
| S(4)  | 58(1) | 51(1) | 38(1) | -2(1) | 2(1)   | 11(1)  |
| S(3)  | 57(1) | 55(1) | 60(1) | 20(1) | 11(1)  | 11(1)  |
| S(2)  | 48(1) | 54(1) | 65(1) | 10(1) | 10(1)  | 6(1)   |
| S(1)  | 52(1) | 33(1) | 56(1) | -2(1) | -1(1)  | -1(1)  |
| N(1)  | 47(1) | 33(1) | 43(1) | 6(1)  | -6(1)  | 0(1)   |
| N(2)  | 43(1) | 37(1) | 36(1) | 2(1)  | -7(1)  | 4(1)   |
| C(6)  | 75(2) | 47(1) | 59(1) | 6(1)  | -8(1)  | 24(1)  |
| C(5)  | 69(1) | 36(1) | 51(1) | 5(1)  | -5(1)  | 7(1)   |
| C(4)  | 52(1) | 35(1) | 34(1) | 1(1)  | -5(1)  | 6(1)   |
| C(1)  | 47(1) | 32(1) | 32(1) | 1(1)  | -3(1)  | 3(1)   |
| C(11) | 42(1) | 34(1) | 38(1) | 2(1)  | -5(1)  | 2(1)   |
| C(12) | 40(1) | 36(1) | 38(1) | 2(1)  | -5(1)  | -3(1)  |
| C(13) | 38(1) | 35(1) | 37(1) | -2(1) | -4(1)  | -3(1)  |
| C(14) | 39(1) | 49(1) | 50(1) | -2(1) | -7(1)  | 1(1)   |
| C(15) | 37(1) | 66(1) | 57(1) | -9(1) | 2(1)   | -4(1)  |
| C(3)  | 48(1) | 35(1) | 32(1) | -4(1) | -4(1)  | 8(1)   |
| C(2)  | 47(1) | 31(1) | 35(1) | 0(1)  | -4(1)  | 4(1)   |
| C(10) | 43(1) | 34(1) | 37(1) | 0(1)  | -3(1)  | 4(1)   |
| C(18) | 52(1) | 46(1) | 40(1) | 6(1)  | -11(1) | 5(1)   |
| C(16) | 50(1) | 69(1) | 43(1) | 1(1)  | 6(1)   | -12(1) |
| C(17) | 50(1) | 51(1) | 40(1) | 6(1)  | -4(1)  | -7(1)  |
| C(9)  | 62(1) | 44(1) | 68(2) | 10(1) | -13(1) | -11(1) |
| C(8)  | 47(1) | 49(1) | 43(1) | -8(1) | -5(1)  | 9(1)   |
| C(7)  | 53(1) | 60(1) | 55(1) | 0(1)  | -9(1)  | 19(1)  |

Table 5. Hydrogen coordinates ( $\times 10^4$ ) and isotropic displacement parameters ( $\text{\AA}^2 \times 10^3$ ) for **4a**.

|        | x    | y    | z    | U(eq) |
|--------|------|------|------|-------|
| H(6)   | -131 | 5202 | 2896 | 72    |
| H(5)   | 2079 | 4989 | 3123 | 62    |
| H(14)  | 7675 | 724  | 4116 | 55    |
| H(15)  | 8347 | 952  | 3135 | 64    |
| H(18A) | 6182 | 425  | 5042 | 70    |
| H(18B) | 5280 | 1002 | 5444 | 70    |
| H(18C) | 6690 | 1315 | 5251 | 70    |

|       |       |      |      |    |
|-------|-------|------|------|----|
| H(16) | 7109  | 1771 | 2485 | 65 |
| H(17) | 5137  | 2369 | 2790 | 56 |
| H(9A) | 4956  | 3655 | 3751 | 87 |
| H(9B) | 4066  | 4442 | 3894 | 87 |
| H(9C) | 4439  | 4229 | 3226 | 87 |
| H(8)  | -1038 | 2811 | 3344 | 55 |
| H(7)  | -1655 | 4134 | 3001 | 67 |

---

Table 6. Torsion angles [ ° ] for **4a**.

|                         |             |
|-------------------------|-------------|
| C(7)-C(6)-C(5)-C(4)     | -0.2(3)     |
| C(1)-N(1)-C(4)-C(3)     | -0.7(2)     |
| C(9)-N(1)-C(4)-C(3)     | -173.46(19) |
| C(1)-N(1)-C(4)-C(5)     | 177.0(2)    |
| C(9)-N(1)-C(4)-C(5)     | 4.2(3)      |
| C(6)-C(5)-C(4)-N(1)     | -177.5(2)   |
| C(6)-C(5)-C(4)-C(3)     | -0.1(3)     |
| C(4)-N(1)-C(1)-C(2)     | 1.0(2)      |
| C(9)-N(1)-C(1)-C(2)     | 173.63(19)  |
| C(4)-N(1)-C(1)-C(11)    | 179.97(17)  |
| C(9)-N(1)-C(1)-C(11)    | -7.4(3)     |
| N(1)-C(1)-C(11)-C(10)   | 118.5(2)    |
| C(2)-C(1)-C(11)-C(10)   | -62.8(3)    |
| N(1)-C(1)-C(11)-C(12)   | -64.8(3)    |
| C(2)-C(1)-C(11)-C(12)   | 113.9(2)    |
| C(10)-C(11)-C(12)-C(17) | 179.7(2)    |
| C(1)-C(11)-C(12)-C(17)  | 2.5(3)      |
| C(10)-C(11)-C(12)-C(13) | 0.7(2)      |
| C(1)-C(11)-C(12)-C(13)  | -176.47(17) |
| C(10)-N(2)-C(13)-C(14)  | -178.81(19) |
| C(18)-N(2)-C(13)-C(14)  | 7.7(3)      |
| C(10)-N(2)-C(13)-C(12)  | 0.0(2)      |
| C(18)-N(2)-C(13)-C(12)  | -173.48(17) |
| C(17)-C(12)-C(13)-N(2)  | -179.63(17) |
| C(11)-C(12)-C(13)-N(2)  | -0.5(2)     |
| C(17)-C(12)-C(13)-C(14) | -0.7(3)     |
| C(11)-C(12)-C(13)-C(14) | 178.48(17)  |



|                         |             |
|-------------------------|-------------|
| N(2)-C(13)-C(14)-C(15)  | 179.24(18)  |
| C(12)-C(13)-C(14)-C(15) | 0.5(3)      |
| C(13)-C(14)-C(15)-C(16) | 0.1(3)      |
| N(1)-C(4)-C(3)-C(8)     | 178.33(17)  |
| C(5)-C(4)-C(3)-C(8)     | 0.5(3)      |
| N(1)-C(4)-C(3)-C(2)     | 0.1(2)      |
| C(5)-C(4)-C(3)-C(2)     | -177.73(18) |
| N(1)-C(1)-C(2)-C(3)     | -0.9(2)     |
| C(11)-C(1)-C(2)-C(3)    | -179.77(18) |
| N(1)-C(1)-C(2)-S(1)     | 171.57(14)  |
| C(11)-C(1)-C(2)-S(1)    | -7.3(3)     |
| C(4)-C(3)-C(2)-C(1)     | 0.5(2)      |
| C(8)-C(3)-C(2)-C(1)     | -177.4(2)   |
| C(4)-C(3)-C(2)-S(1)     | -171.90(14) |
| C(8)-C(3)-C(2)-S(1)     | 10.3(3)     |
| S(2)-S(1)-C(2)-C(1)     | 95.50(17)   |
| S(2)-S(1)-C(2)-C(3)     | -93.49(17)  |
| C(12)-C(11)-C(10)-N(2)  | -0.7(2)     |
| C(1)-C(11)-C(10)-N(2)   | 176.50(17)  |
| C(12)-C(11)-C(10)-S(4)  | 173.03(14)  |
| C(1)-C(11)-C(10)-S(4)   | -9.8(3)     |
| C(13)-N(2)-C(10)-C(11)  | 0.4(2)      |
| C(18)-N(2)-C(10)-C(11)  | 173.81(17)  |
| C(13)-N(2)-C(10)-S(4)   | -173.70(13) |
| C(18)-N(2)-C(10)-S(4)   | -0.3(3)     |
| S(3)-S(4)-C(10)-C(11)   | 97.50(18)   |
| S(3)-S(4)-C(10)-N(2)    | -89.49(15)  |
| C(14)-C(15)-C(16)-C(17) | -0.6(3)     |
| C(15)-C(16)-C(17)-C(12) | 0.5(3)      |
| C(13)-C(12)-C(17)-C(16) | 0.2(3)      |
| C(11)-C(12)-C(17)-C(16) | -178.7(2)   |
| C(4)-C(3)-C(8)-C(7)     | -0.4(3)     |
| C(2)-C(3)-C(8)-C(7)     | 177.2(2)    |
| C(3)-C(8)-C(7)-C(6)     | 0.1(3)      |
| C(5)-C(6)-C(7)-C(8)     | 0.3(4)      |

---

Symmetry transformations used to generate equivalent atoms:

## 9. Copies of $^1\text{H}$ , $^{13}\text{C}$ and $^{19}\text{F}$ NMR spectra of all products

$^1\text{H}$  and  $^{13}\text{C}$  NMR spectra of **2a**

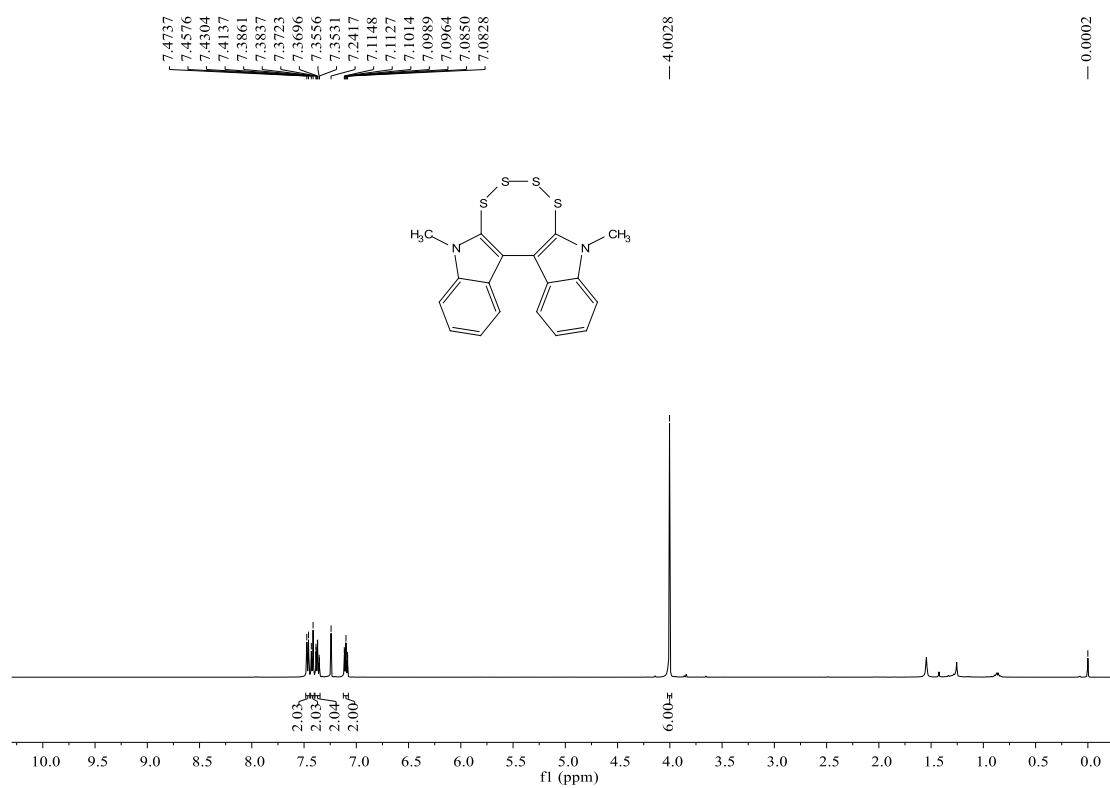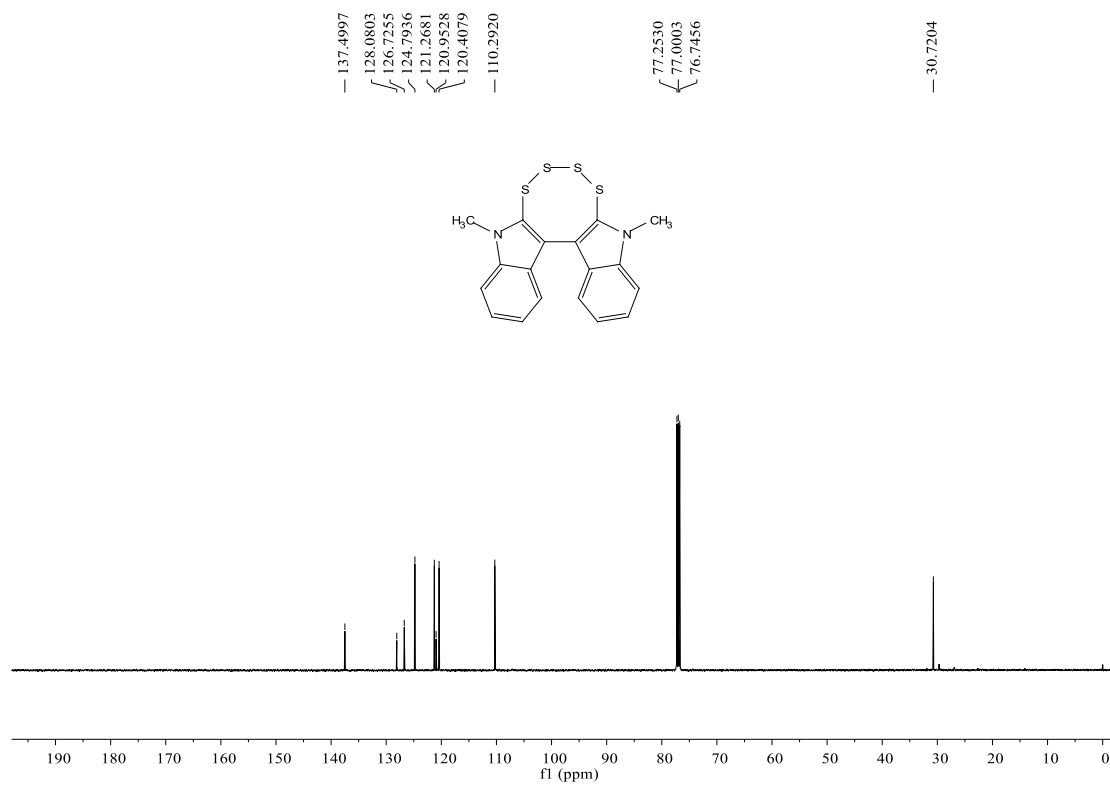

$^1\text{H}$  and  $^{13}\text{C}$  NMR spectra of **2b**

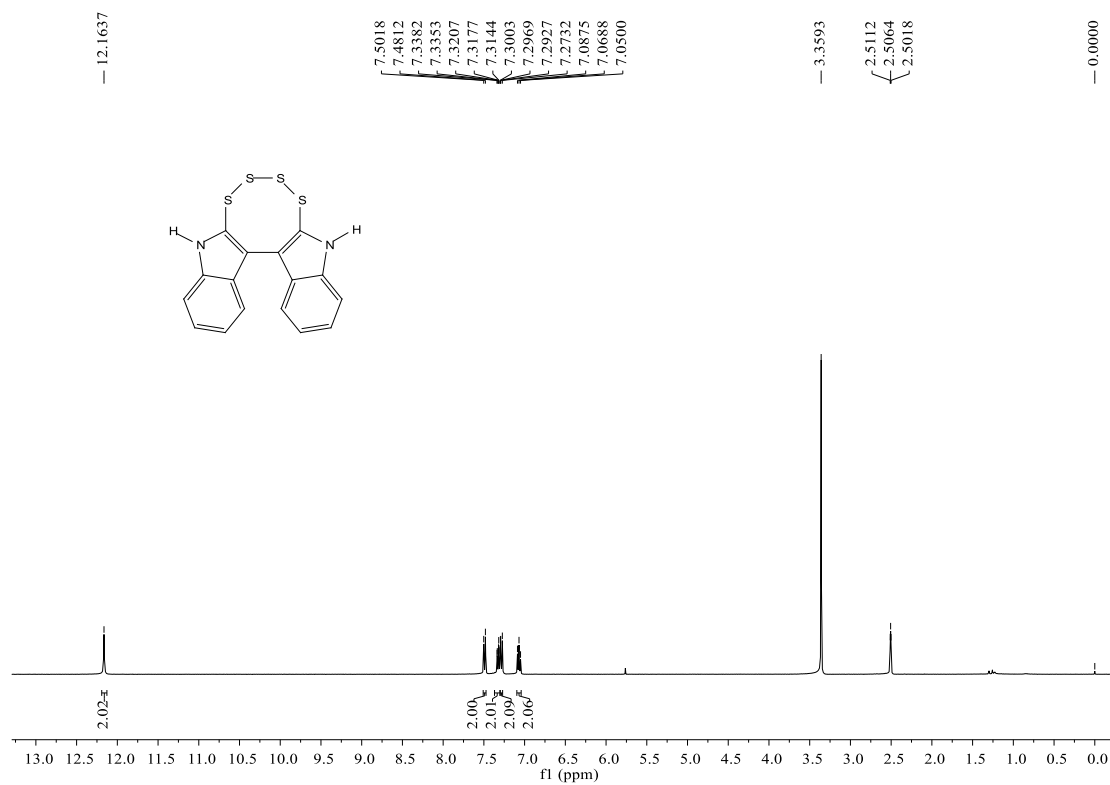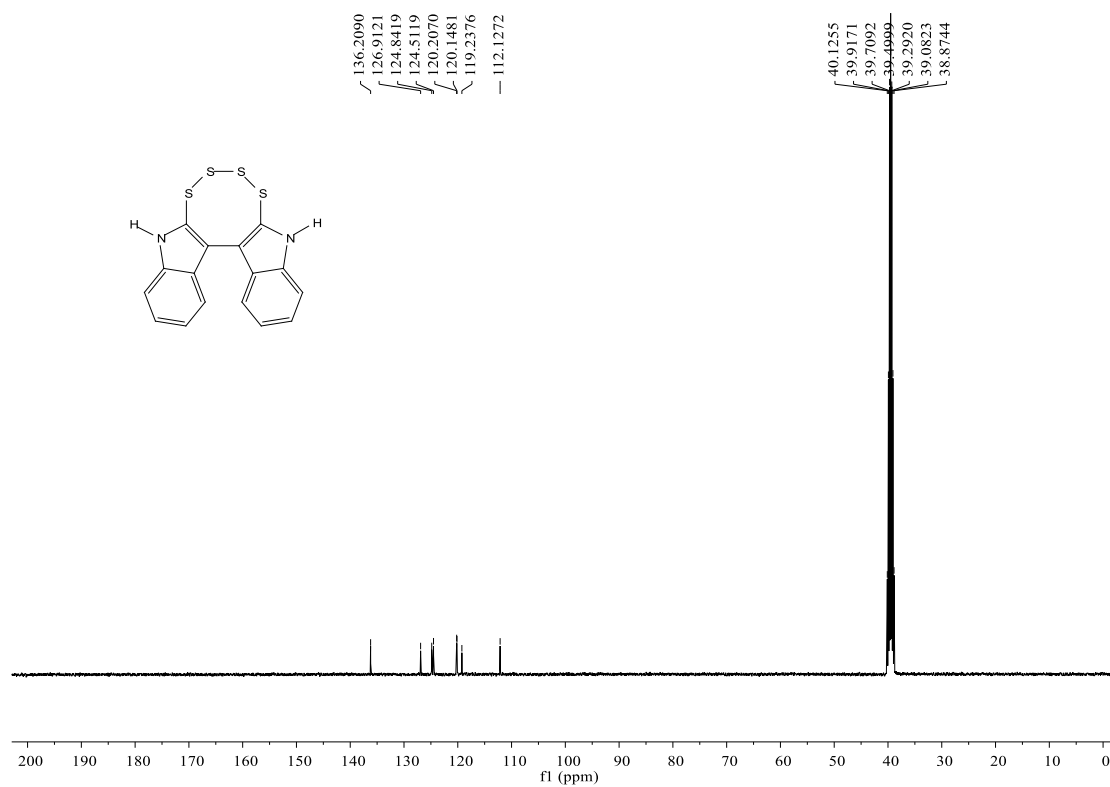

<sup>1</sup>H and <sup>13</sup>C NMR spectra of **2c**

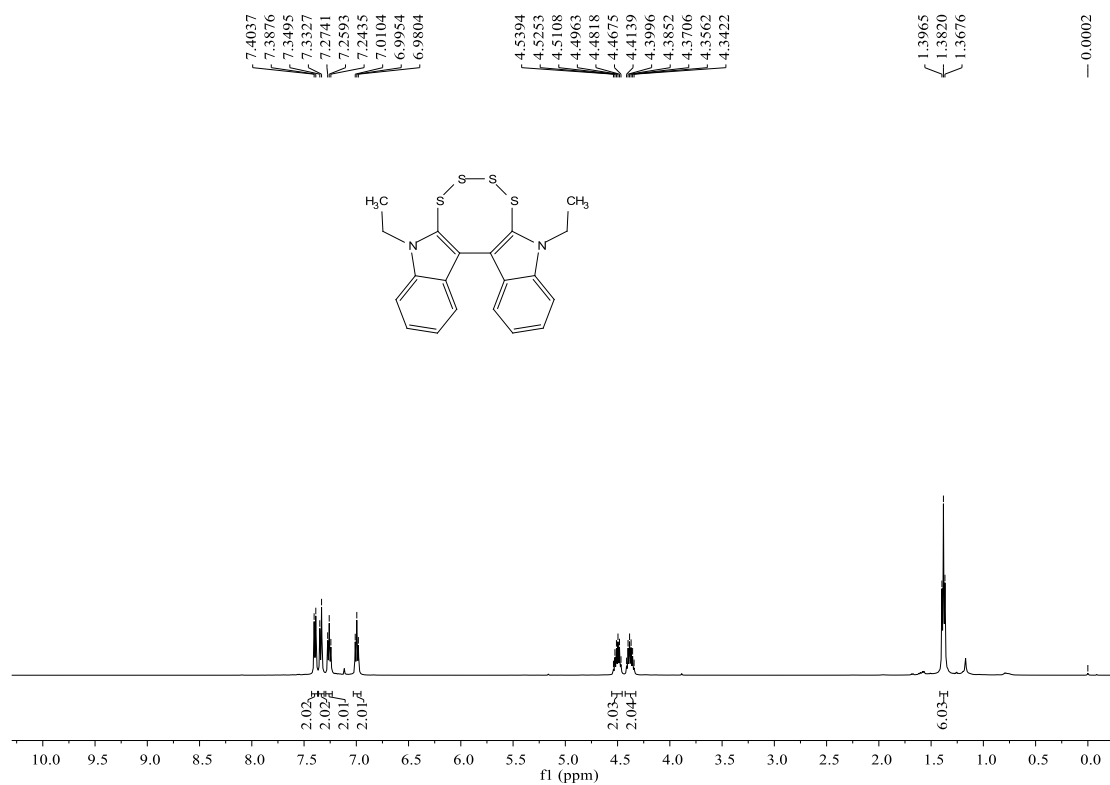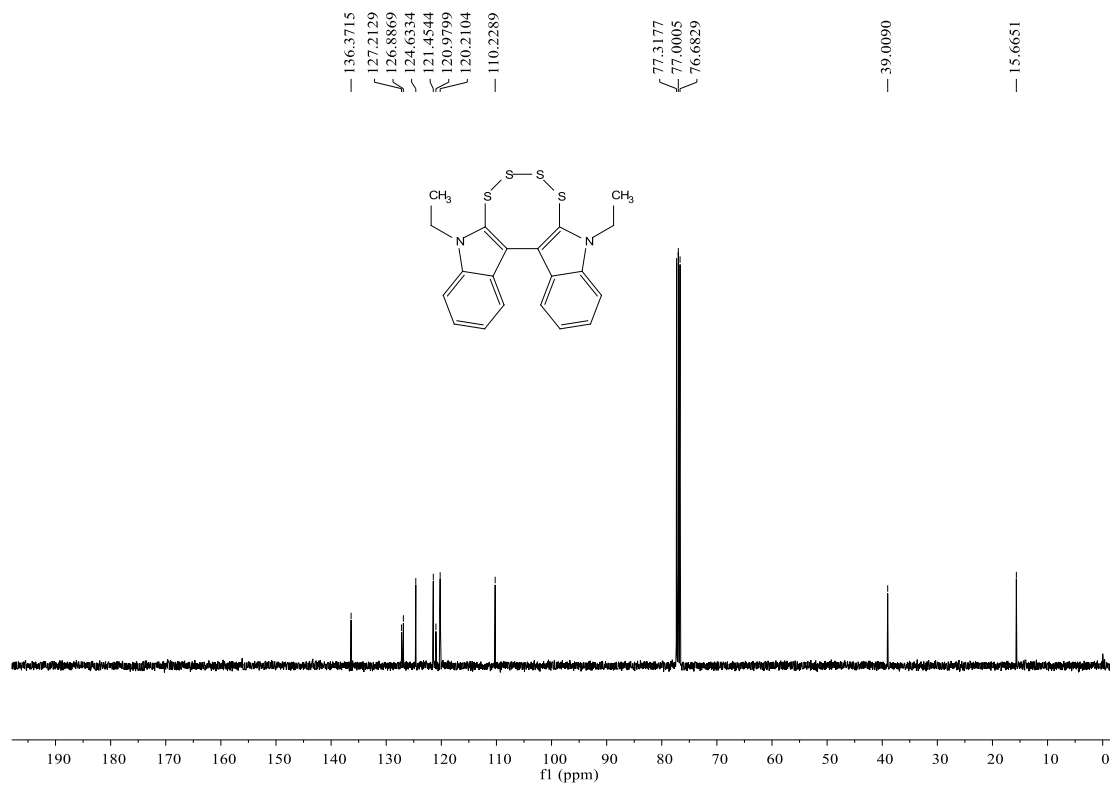

$^1\text{H}$  and  $^{13}\text{C}$  NMR spectra of **2d**

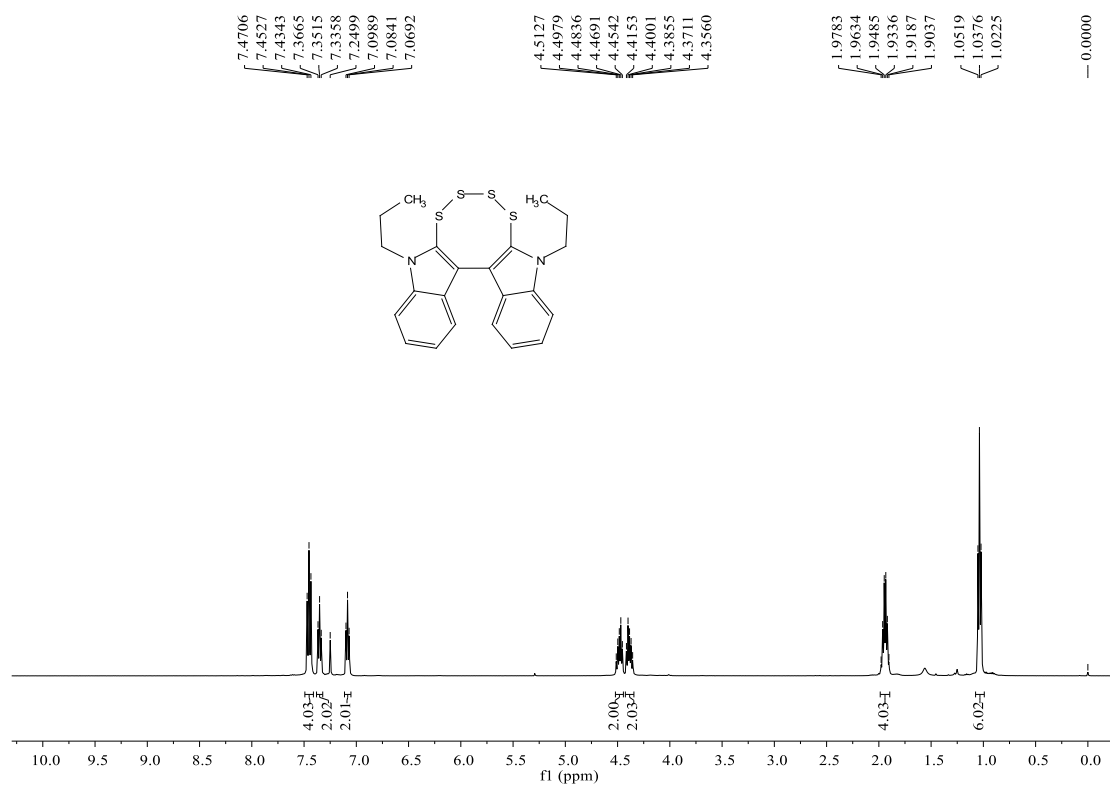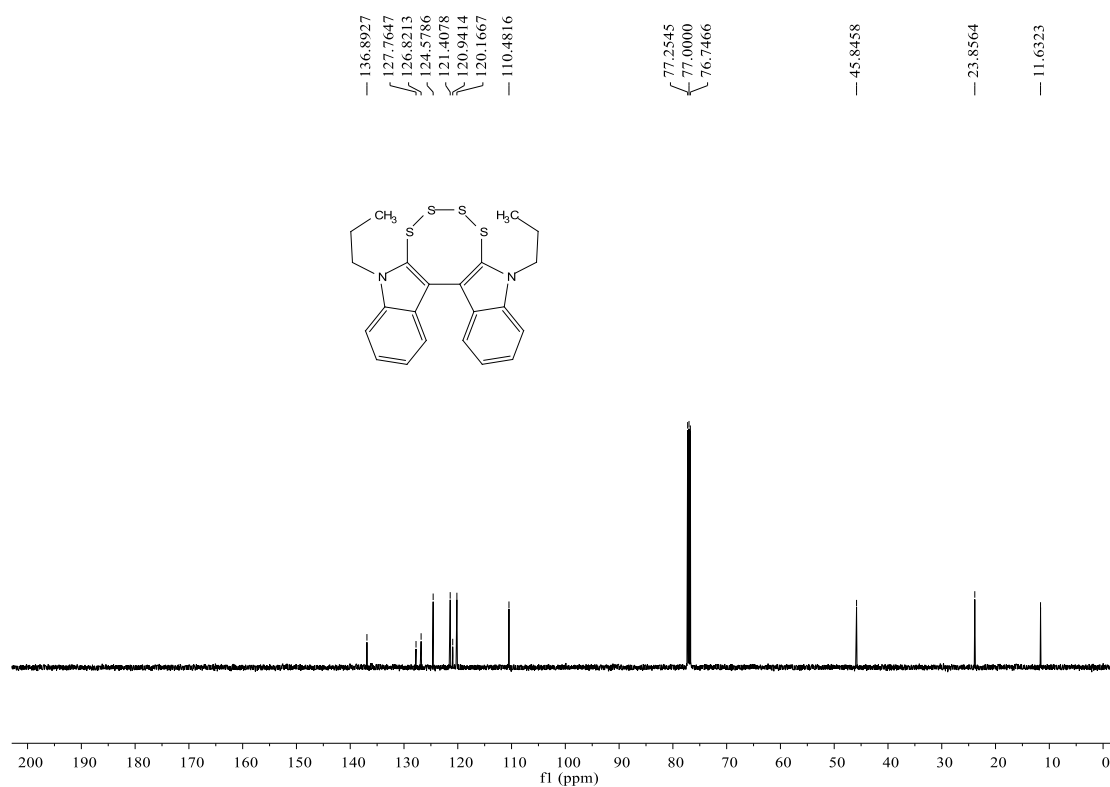

$^1\text{H}$  and  $^{13}\text{C}$  NMR spectra of **2e**

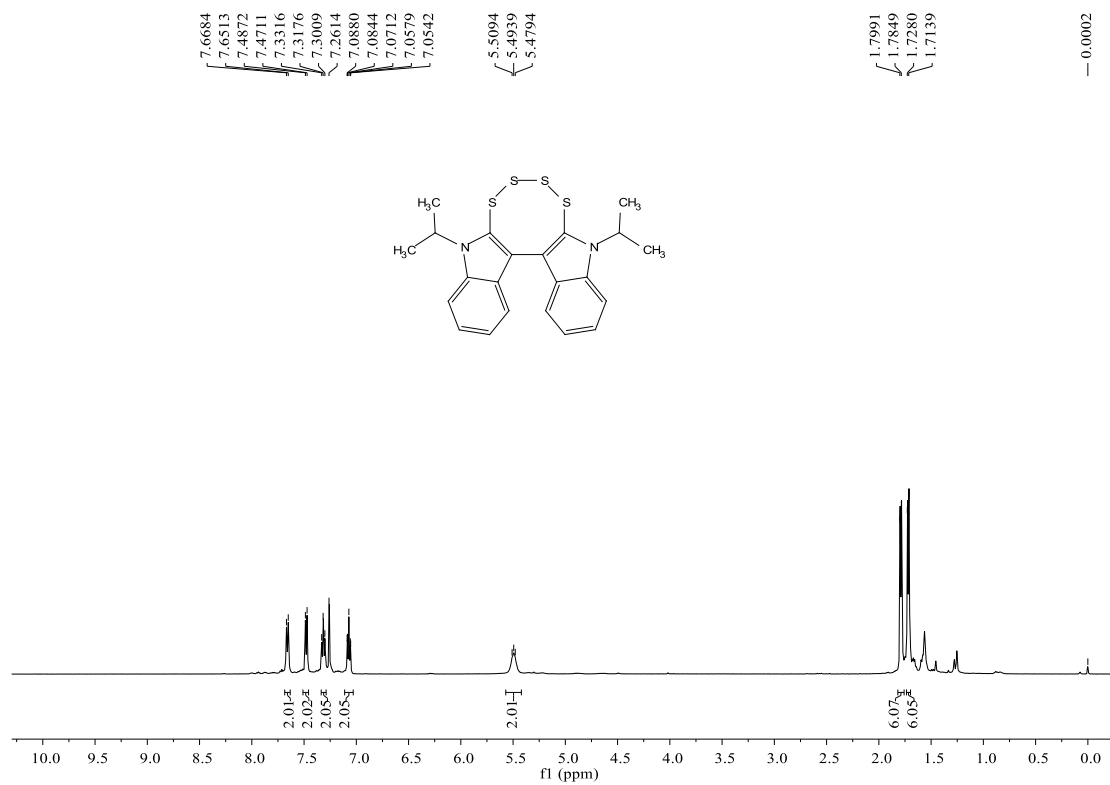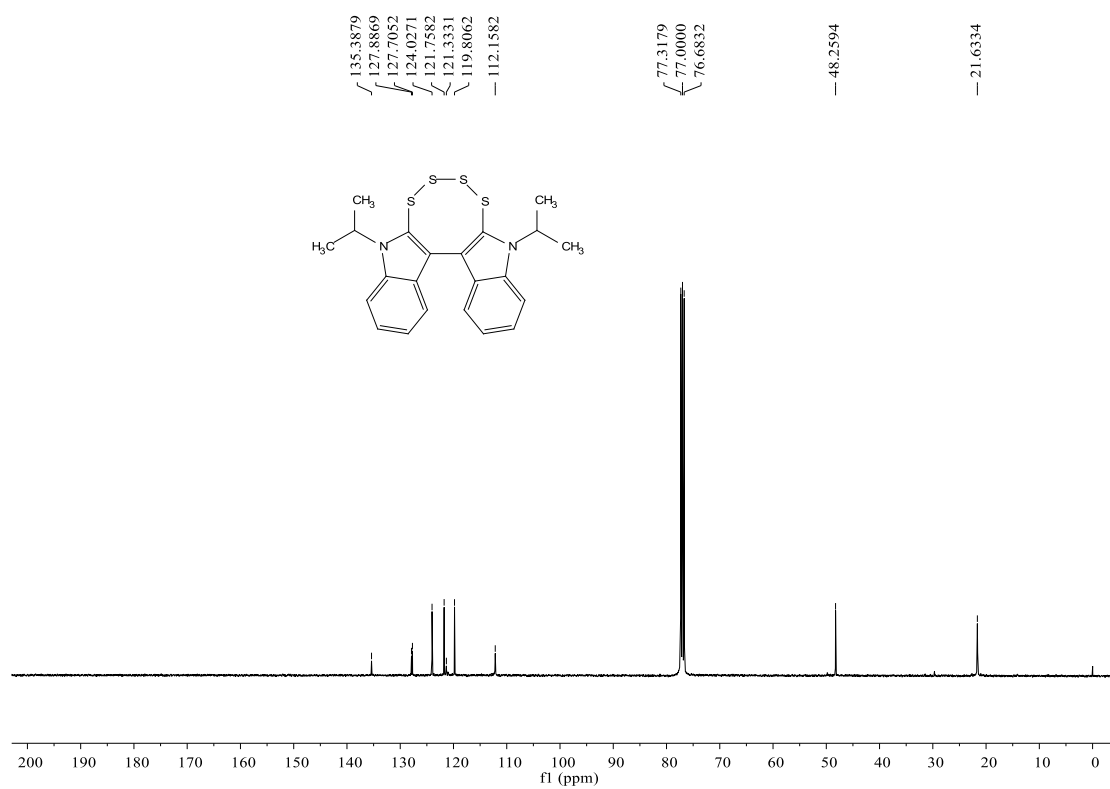

$^1\text{H}$  and  $^{13}\text{C}$  NMR spectra of **2f**

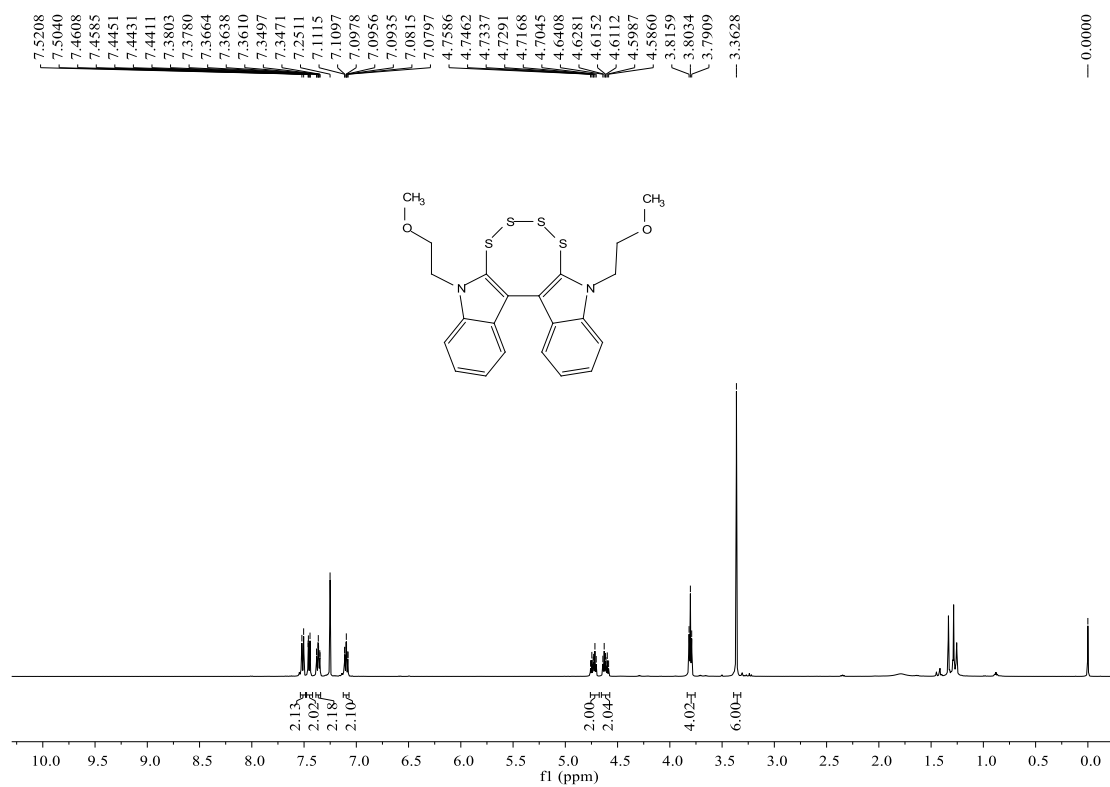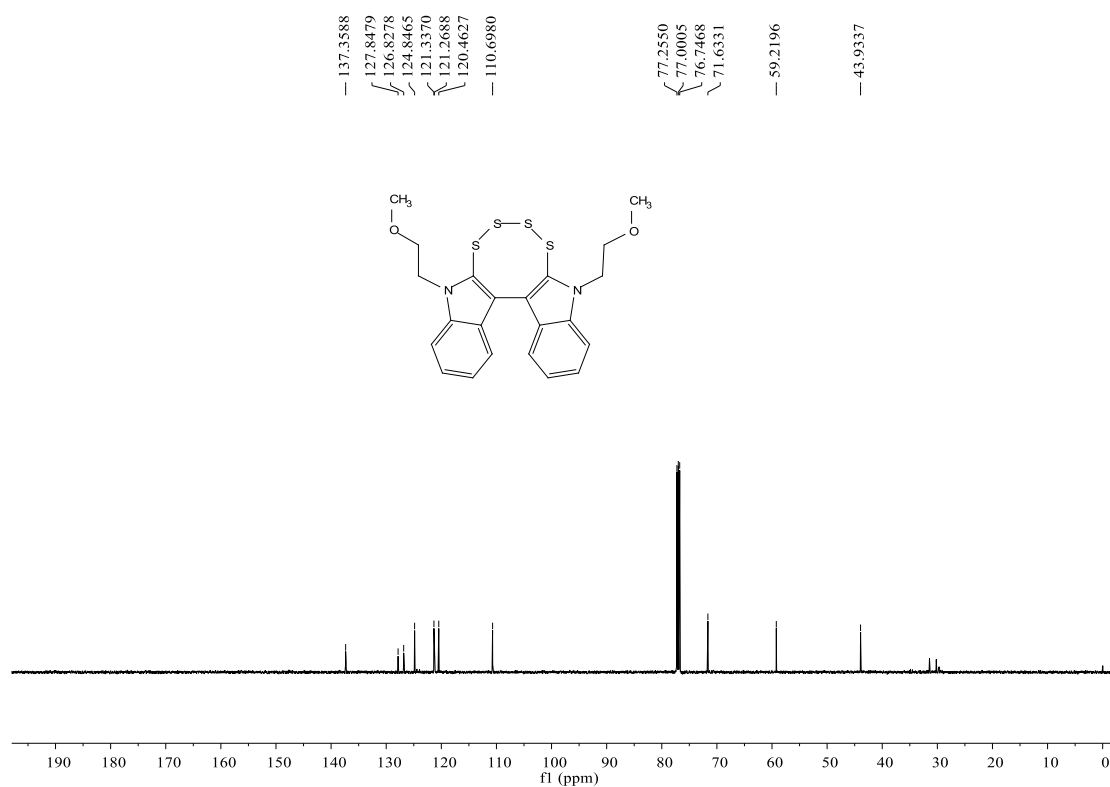

$^1\text{H}$  and  $^{13}\text{C}$  NMR spectra of **2g**

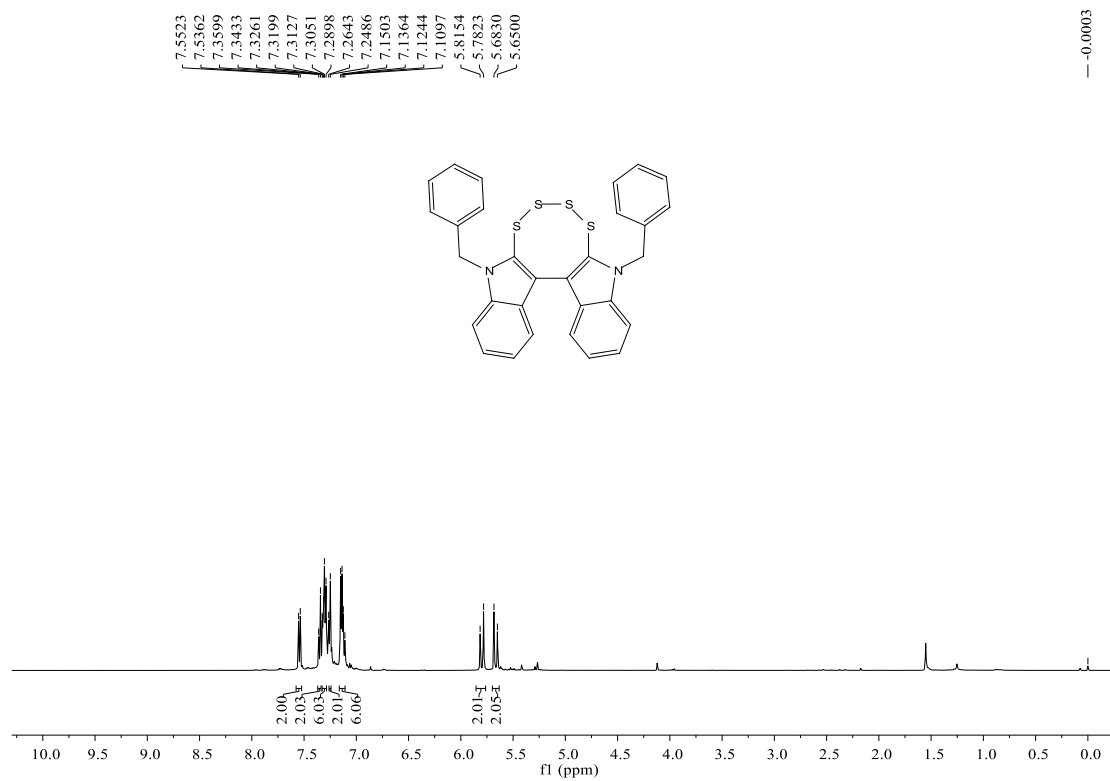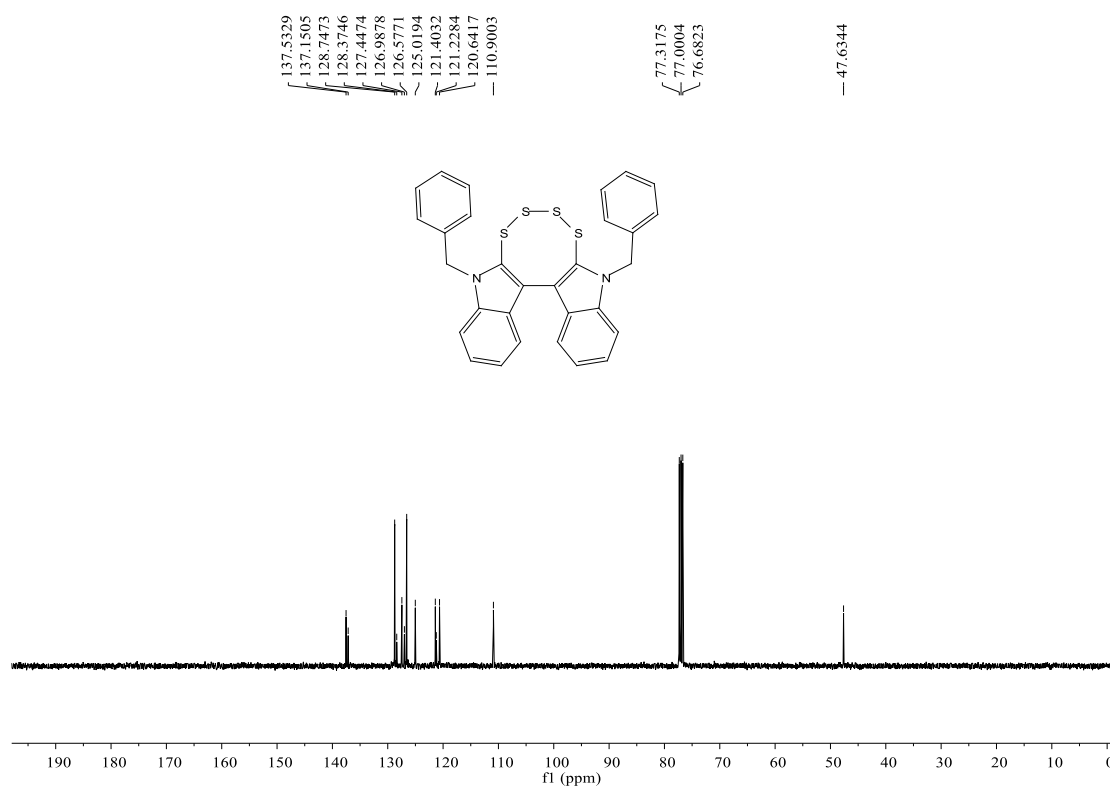



$^1\text{H}$  and  $^{13}\text{C}$  NMR spectra of **2h**

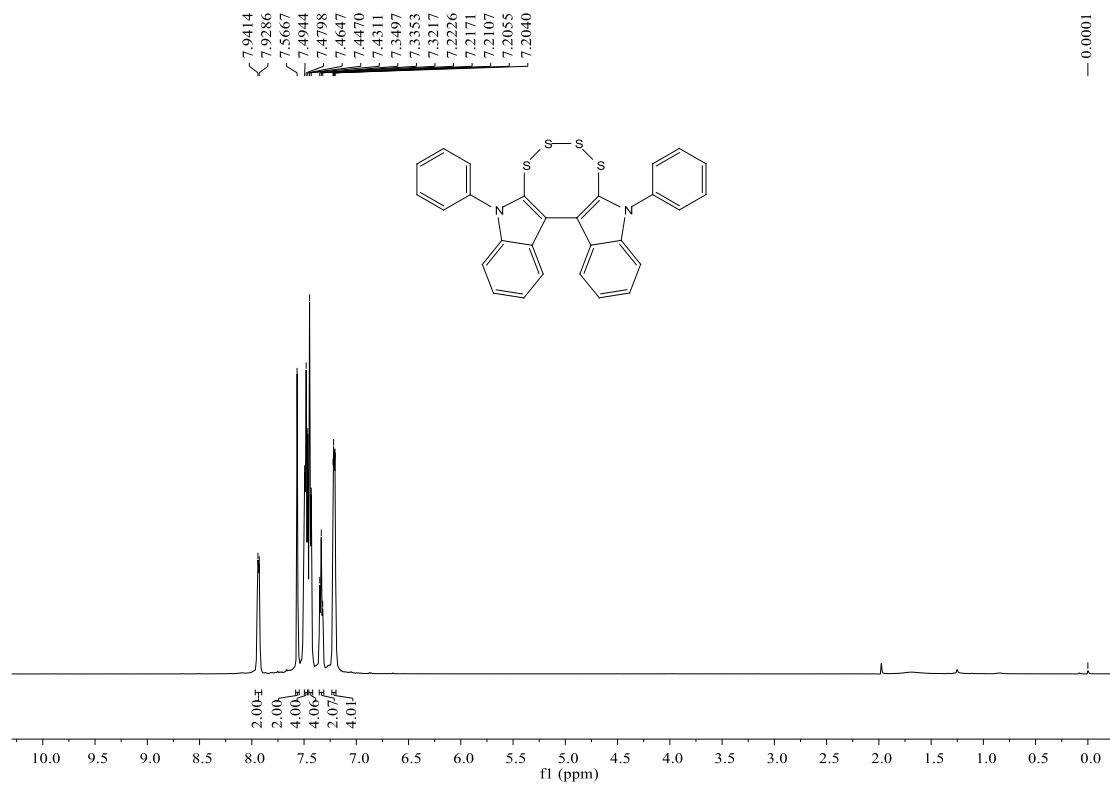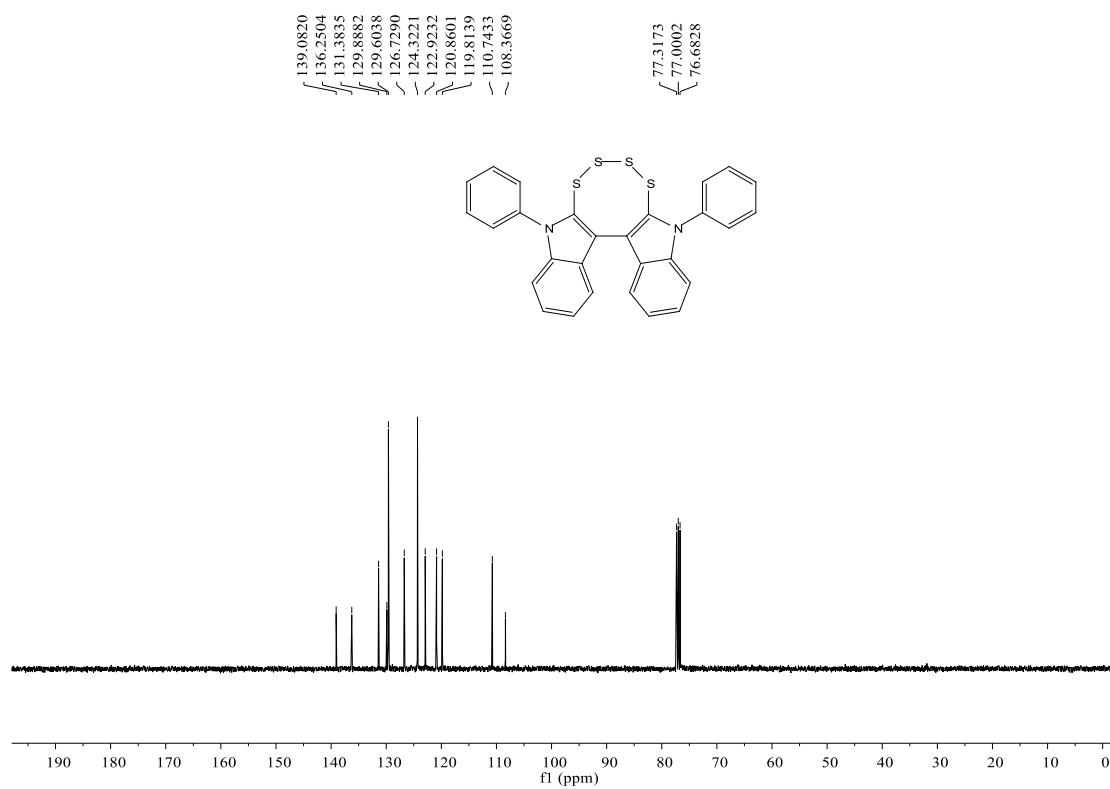

$^1\text{H}$  and  $^{13}\text{C}$  NMR spectra of **2i**

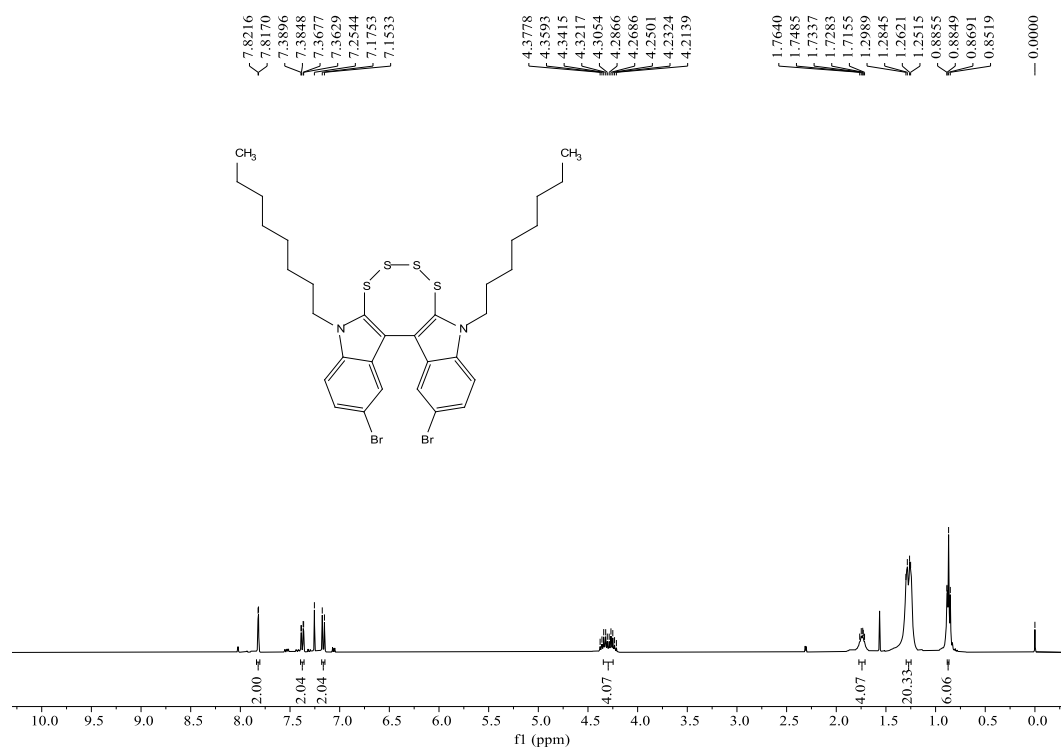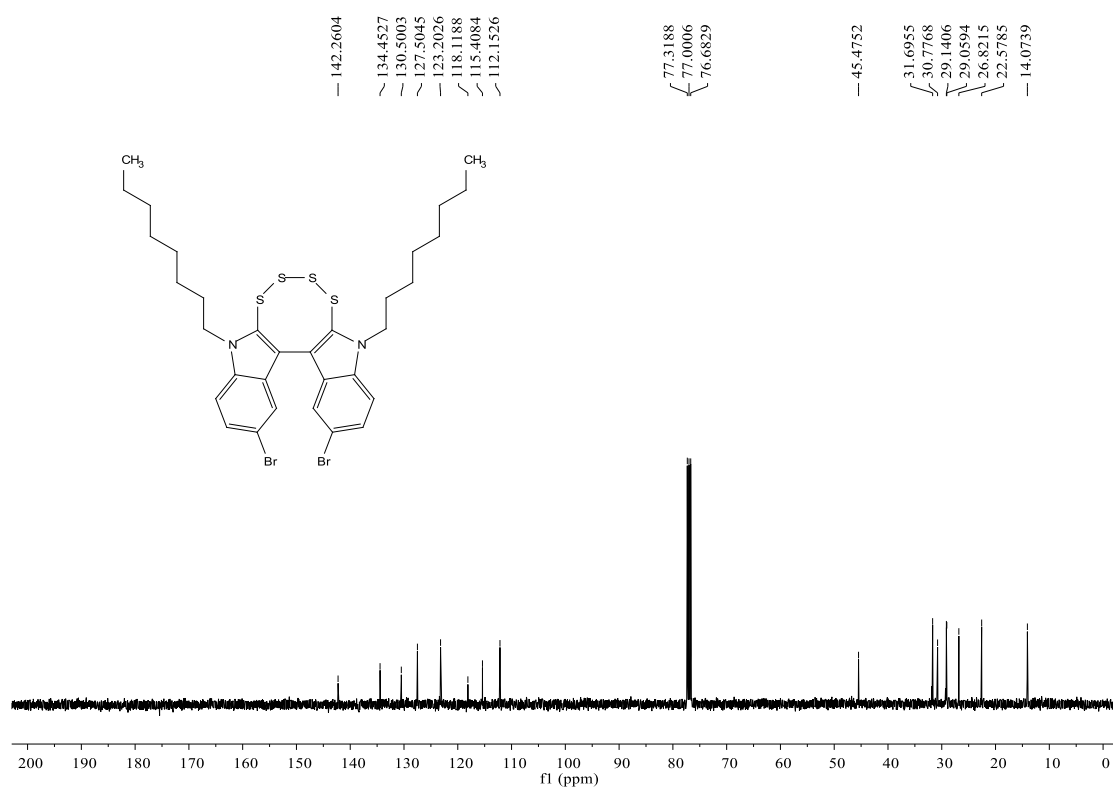

$^1\text{H}$  and  $^{13}\text{C}$  NMR spectra of **2j**

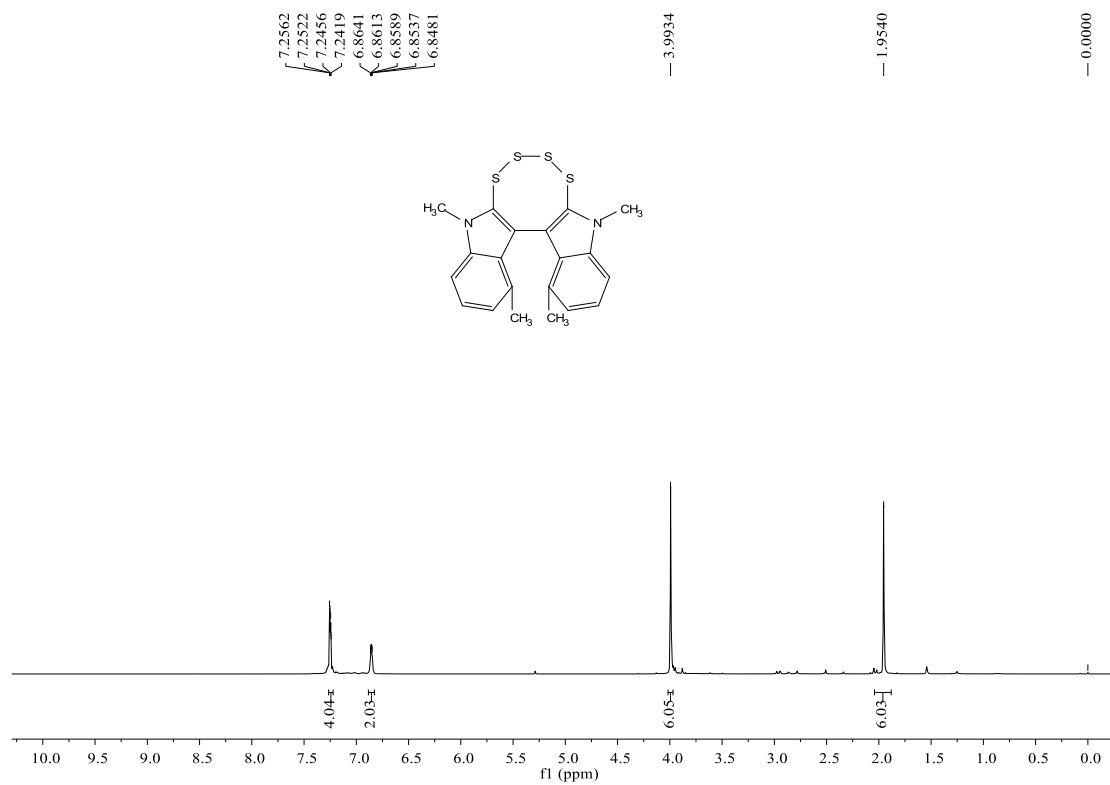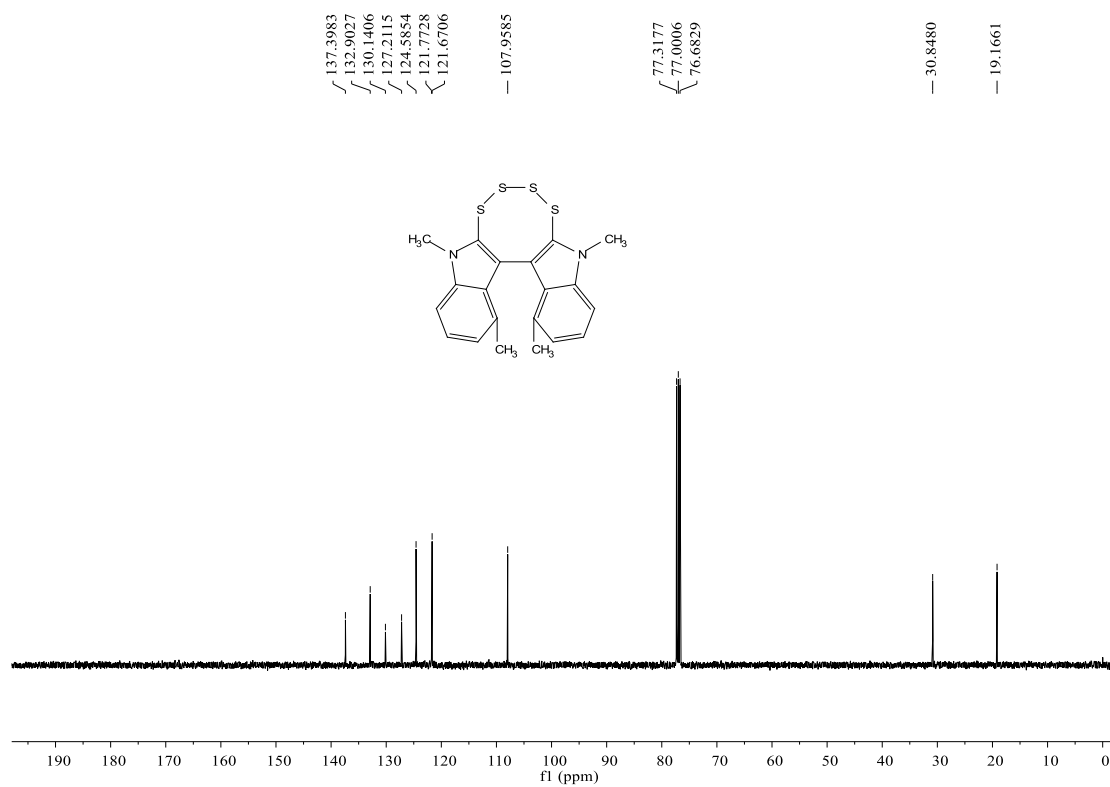

$^1\text{H}$ ,  $^{13}\text{C}$  and  $^{19}\text{F}$  NMR spectra of **2k**

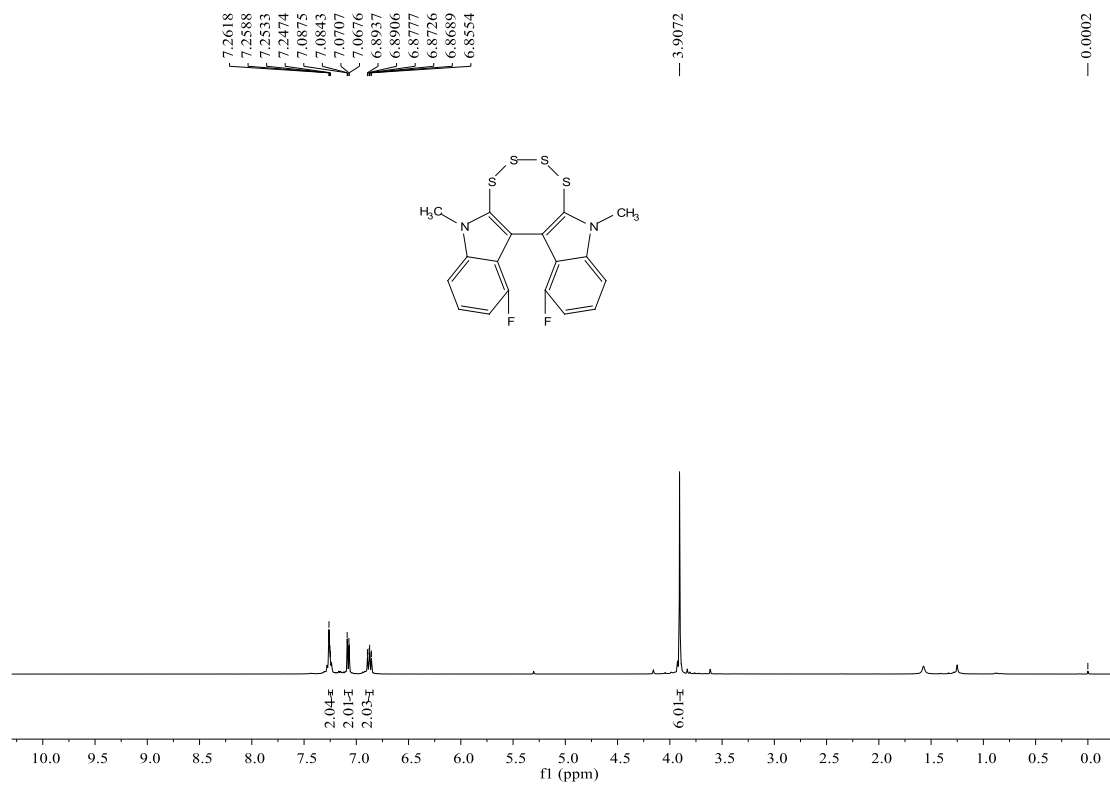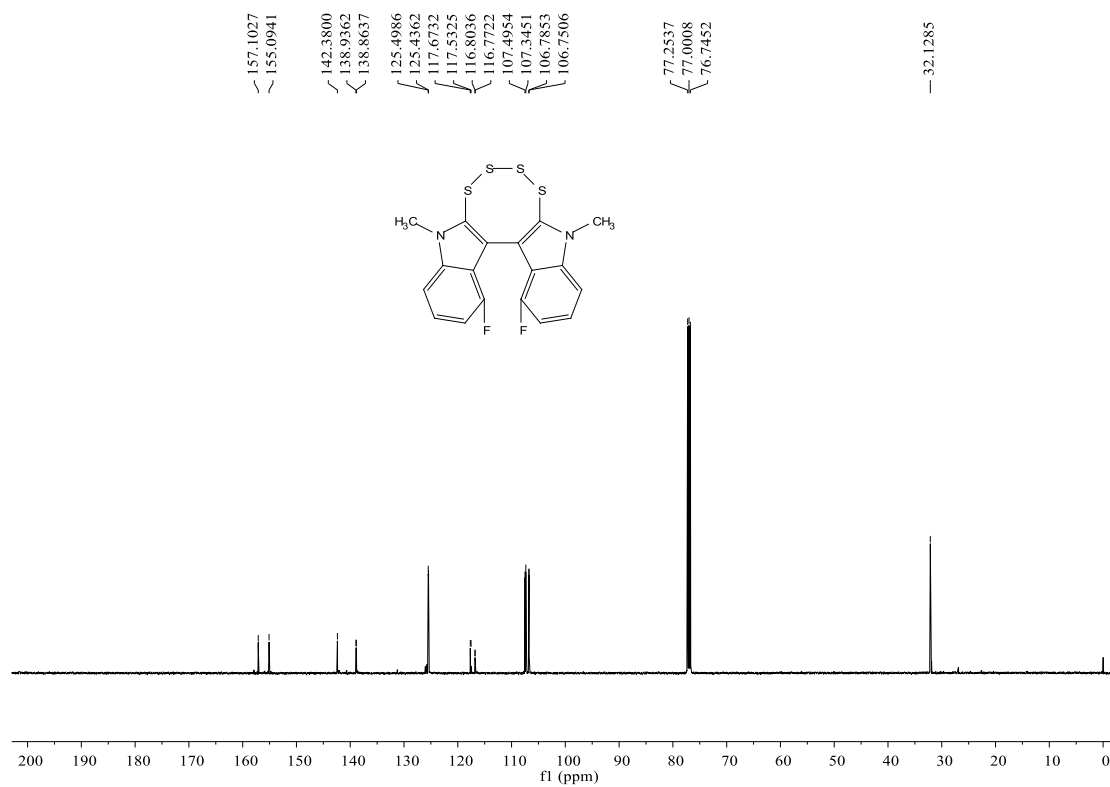

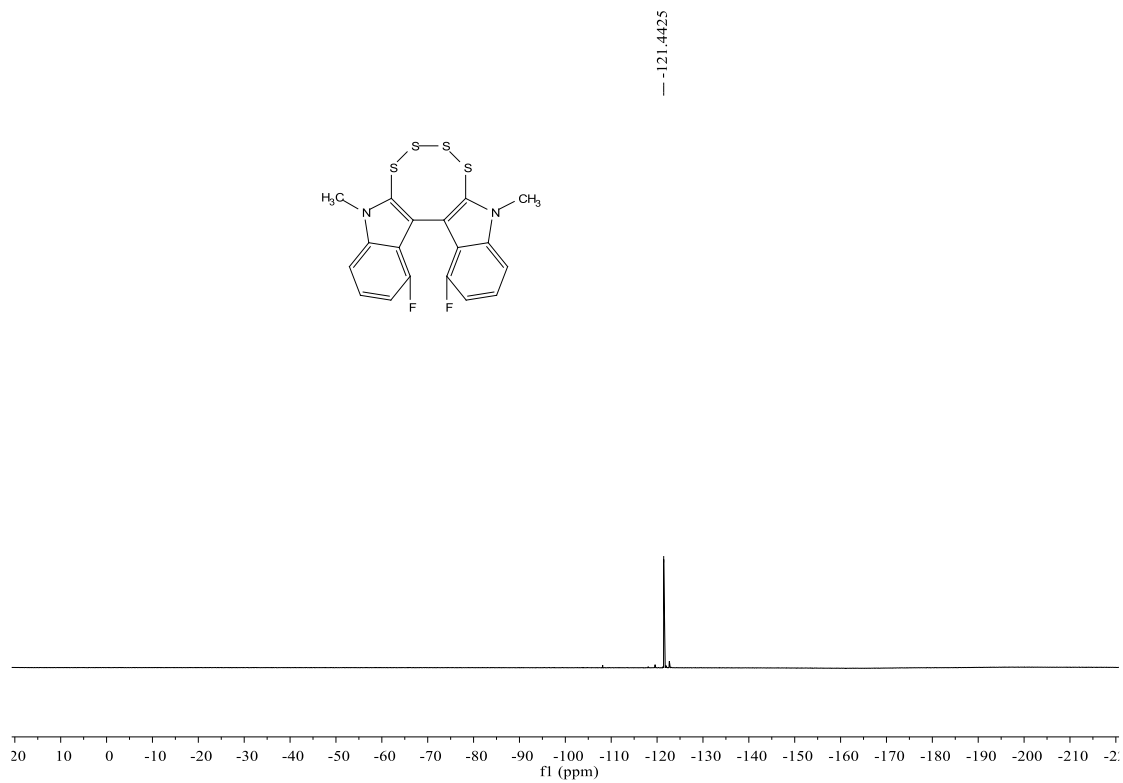

$^1\text{H}$  and  $^{13}\text{C}$  NMR spectra of **2I**

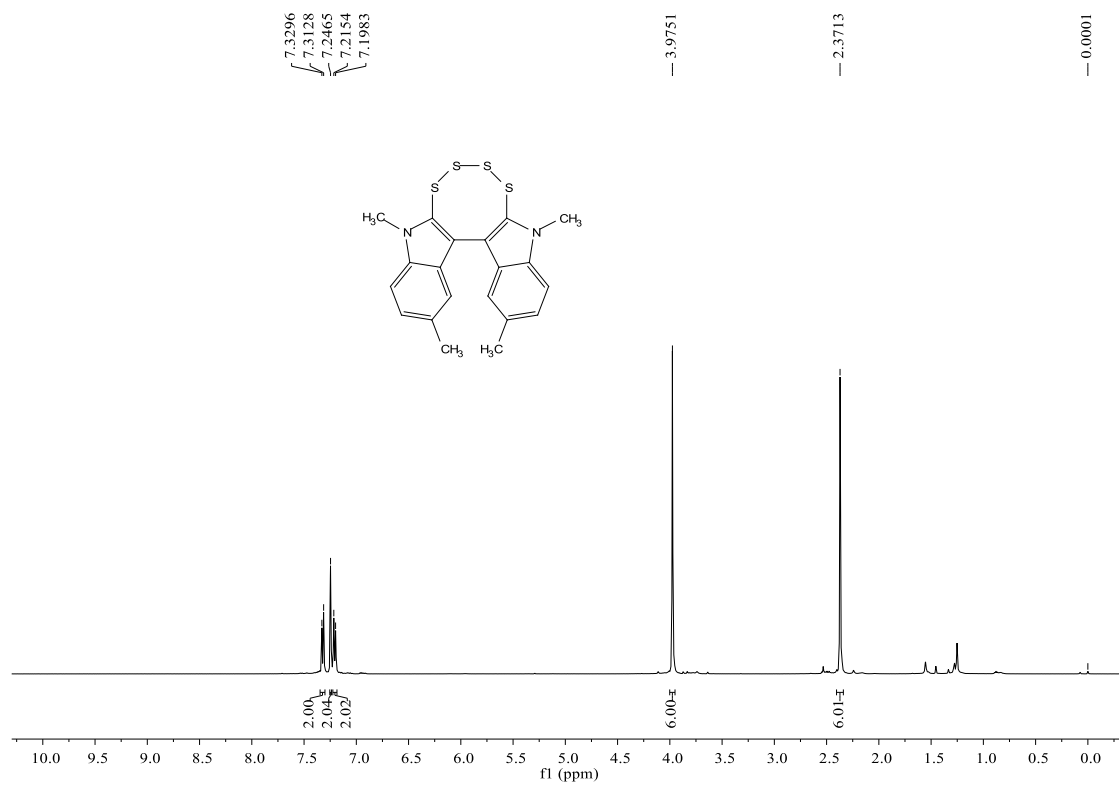

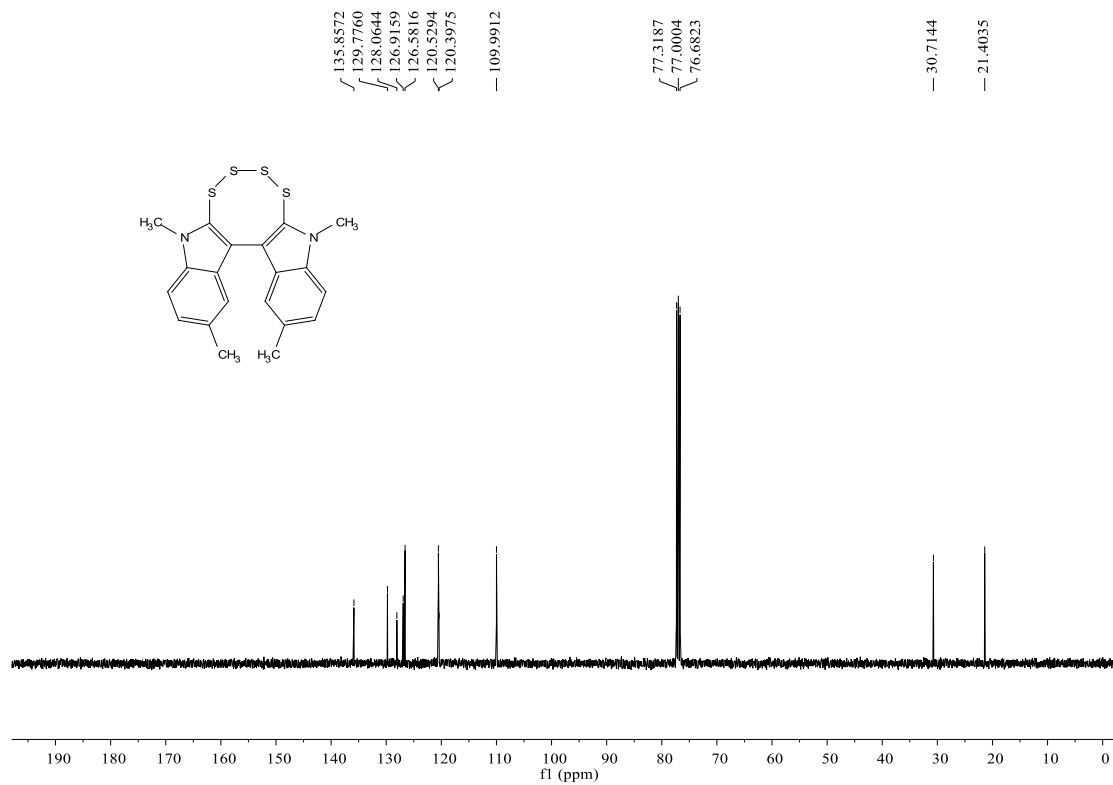

<sup>1</sup>H and <sup>13</sup>C NMR spectra of **2m**

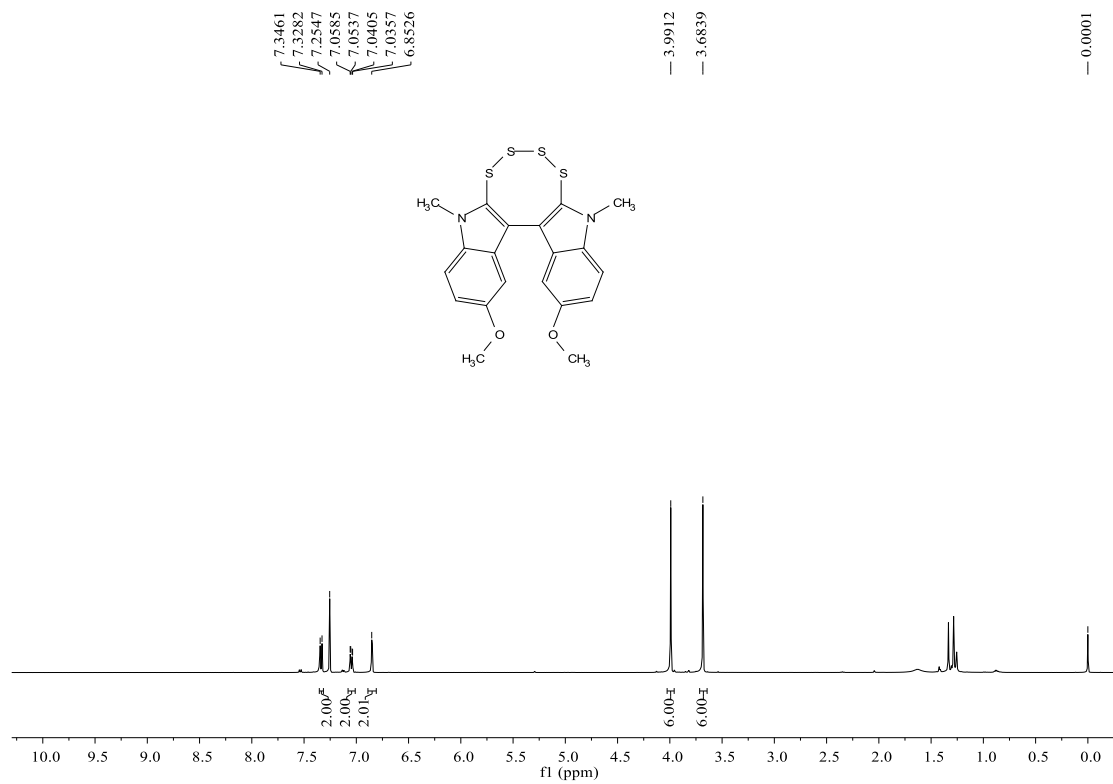

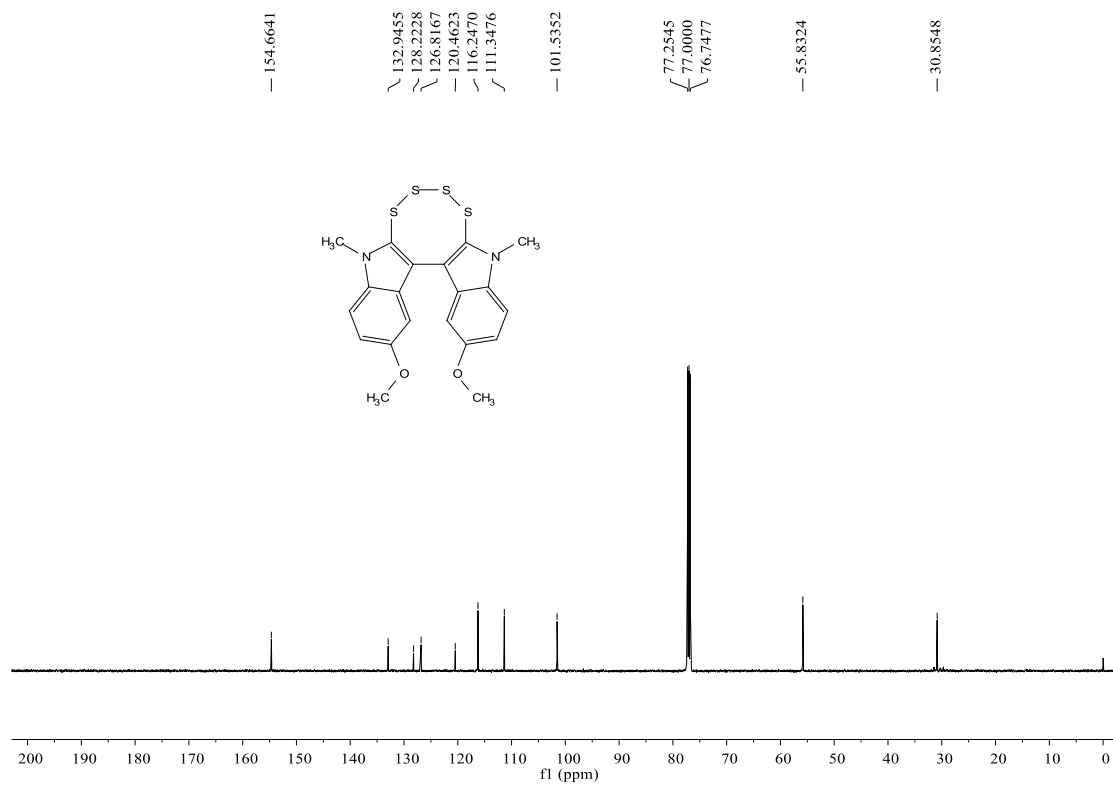

<sup>1</sup>H and <sup>13</sup>C NMR spectra of **2n**

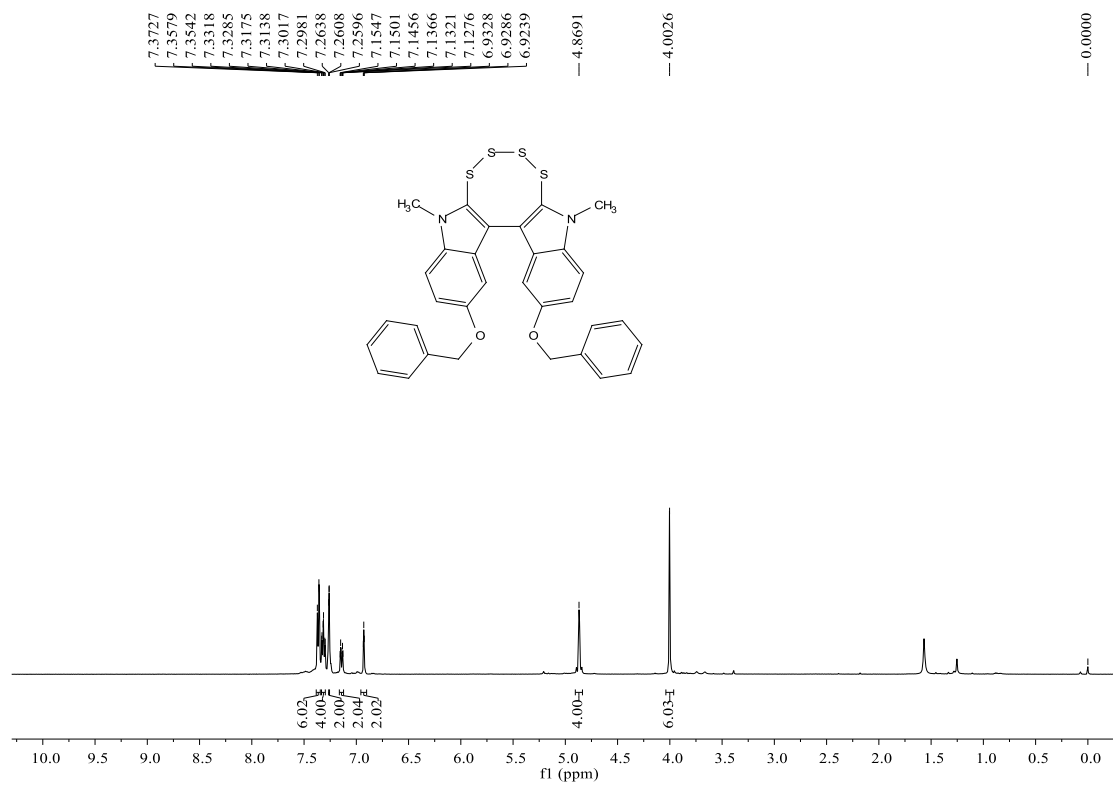

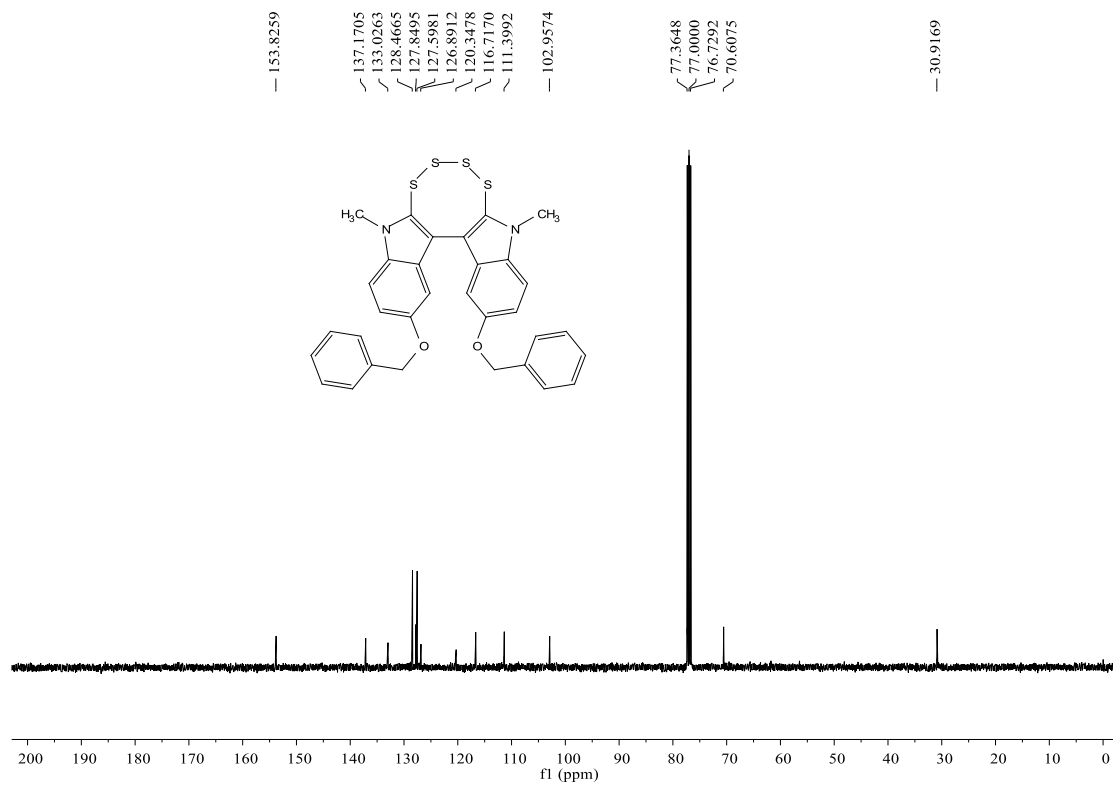

<sup>1</sup>H, <sup>13</sup>C and <sup>19</sup>F NMR spectra of **2o**

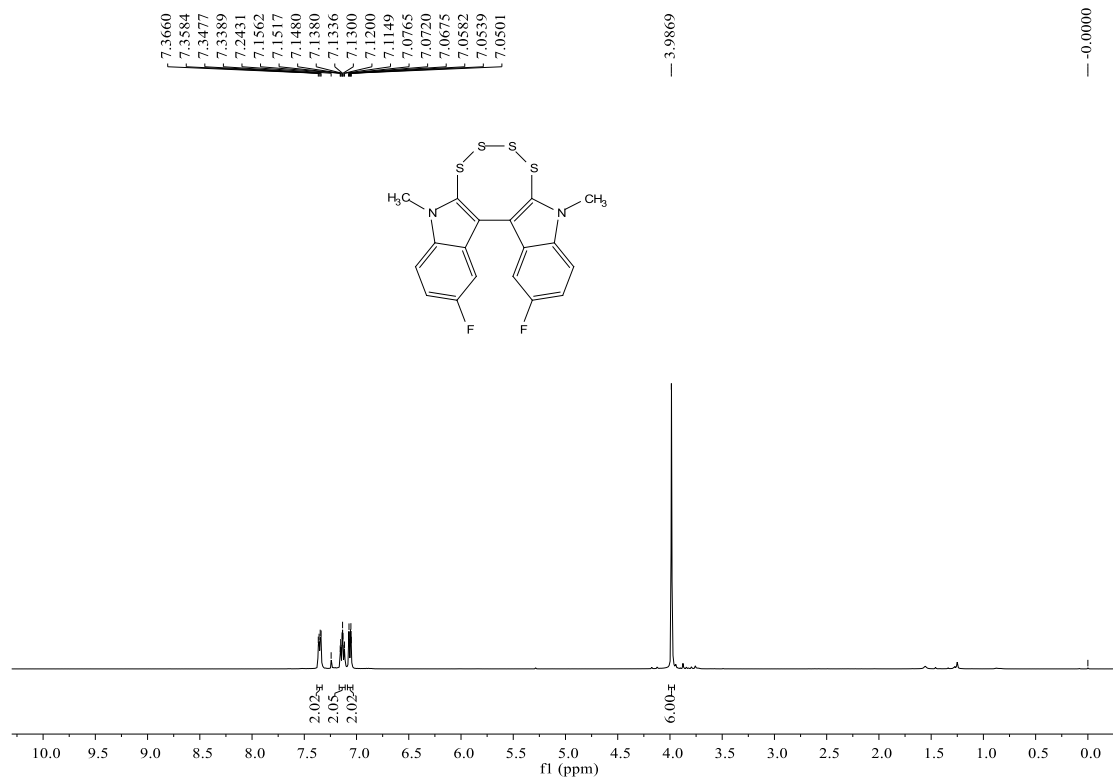



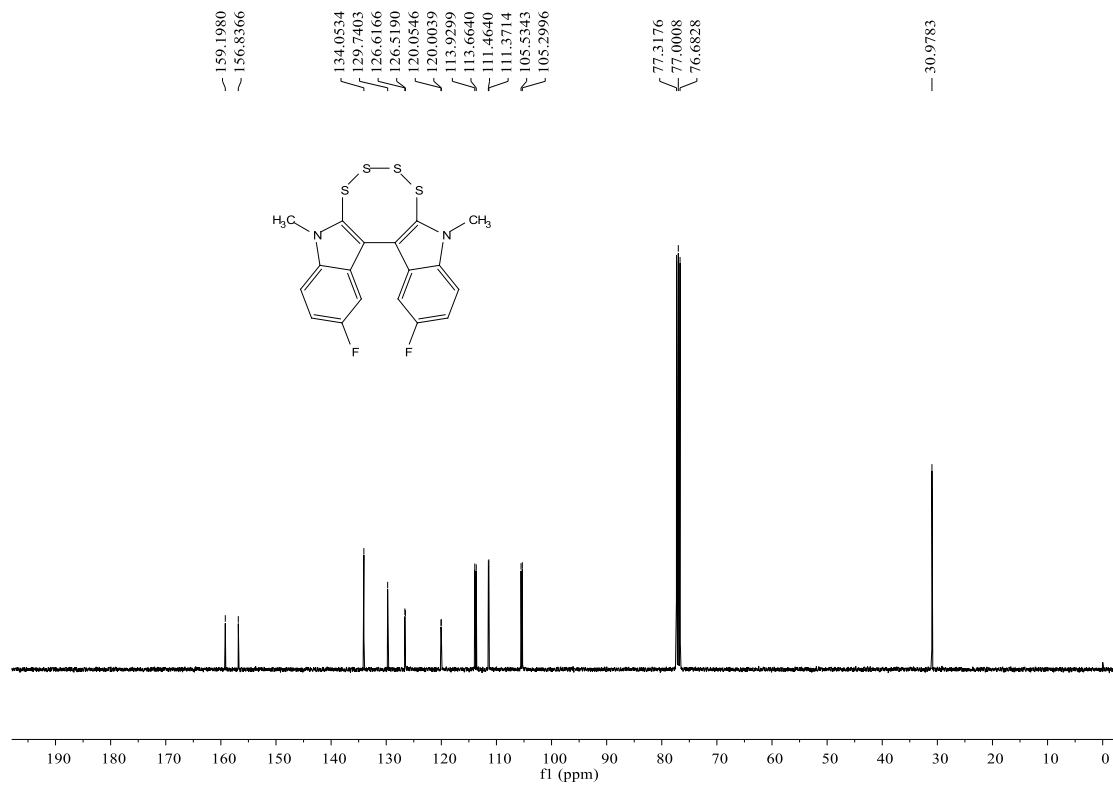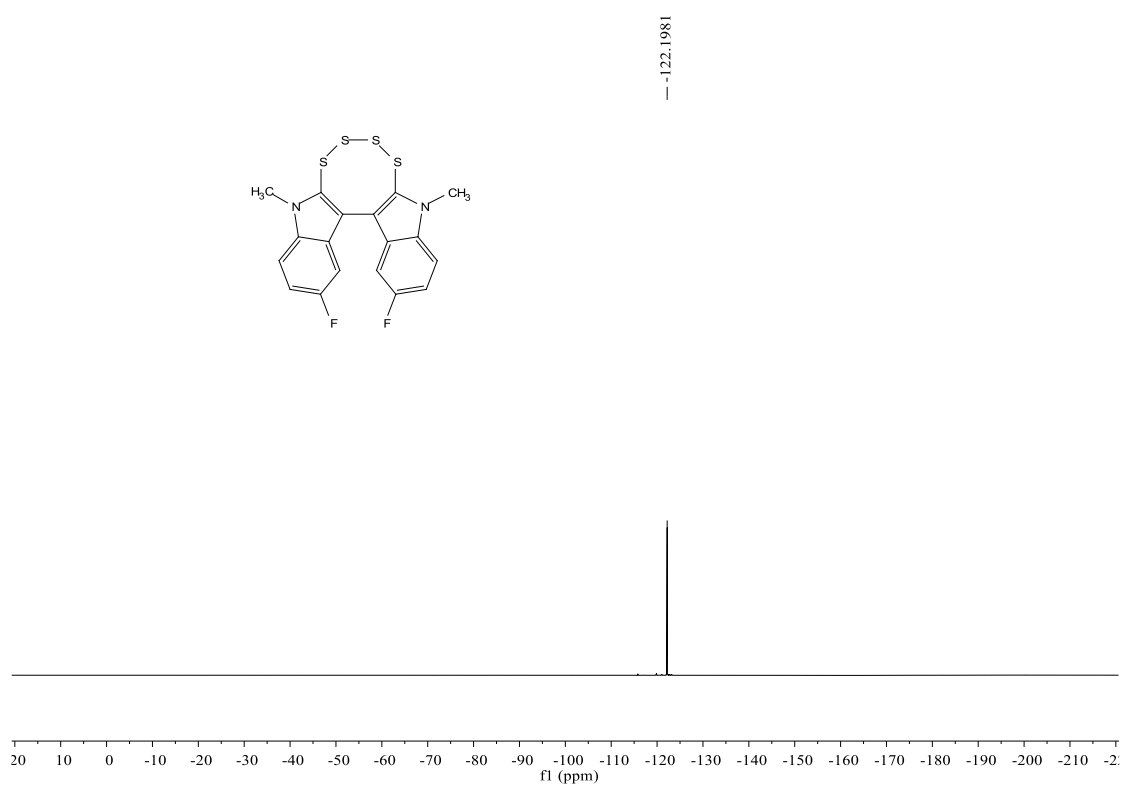

# $^1\text{H}$ and $^{13}\text{C}$ NMR spectra of **2p**

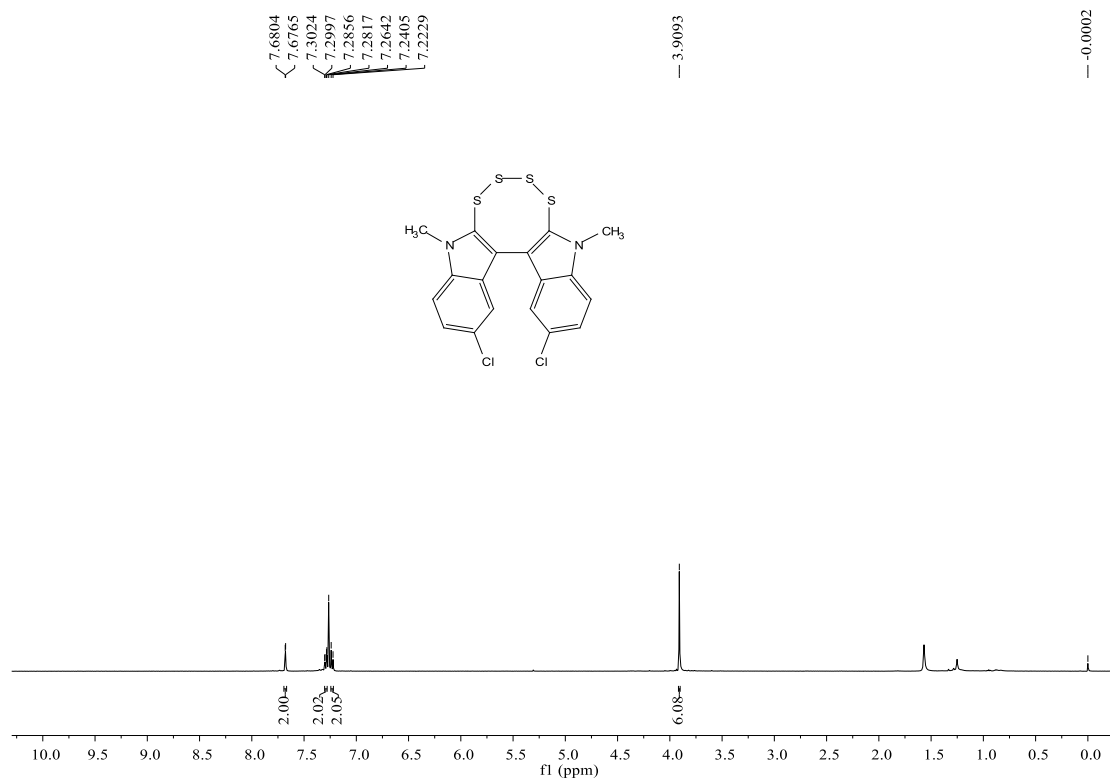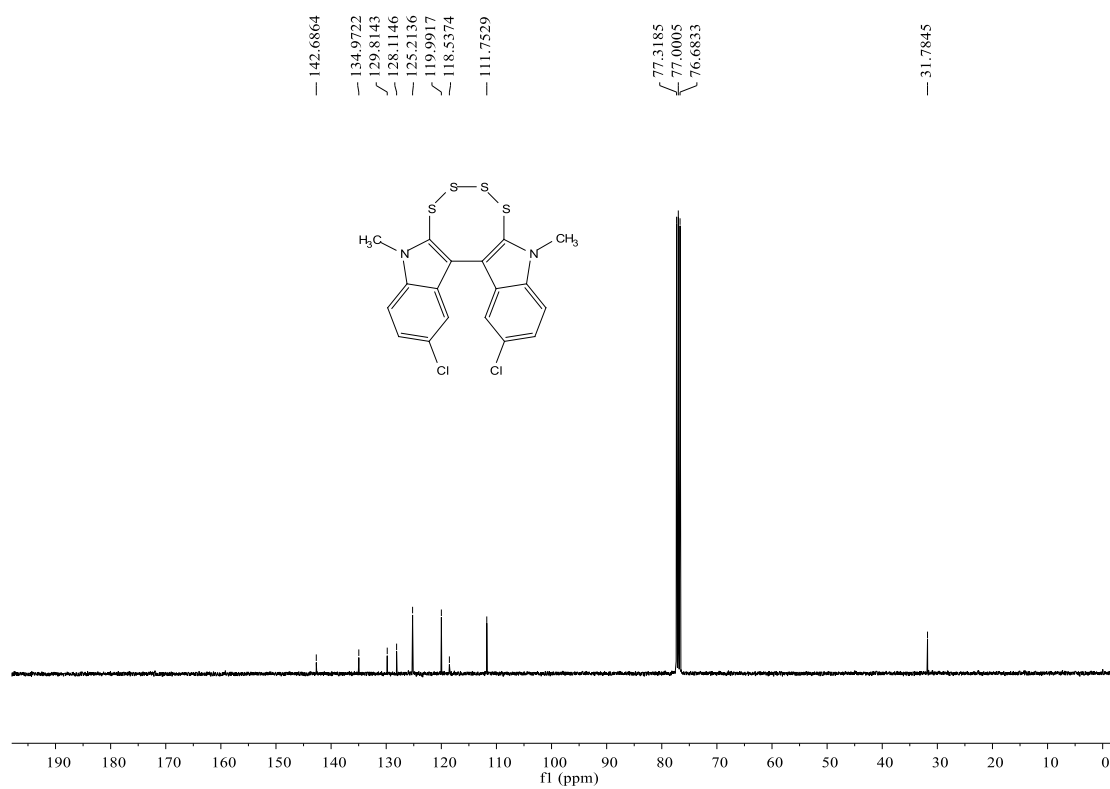

$^1\text{H}$  and  $^{13}\text{C}$  NMR spectra of **2q**

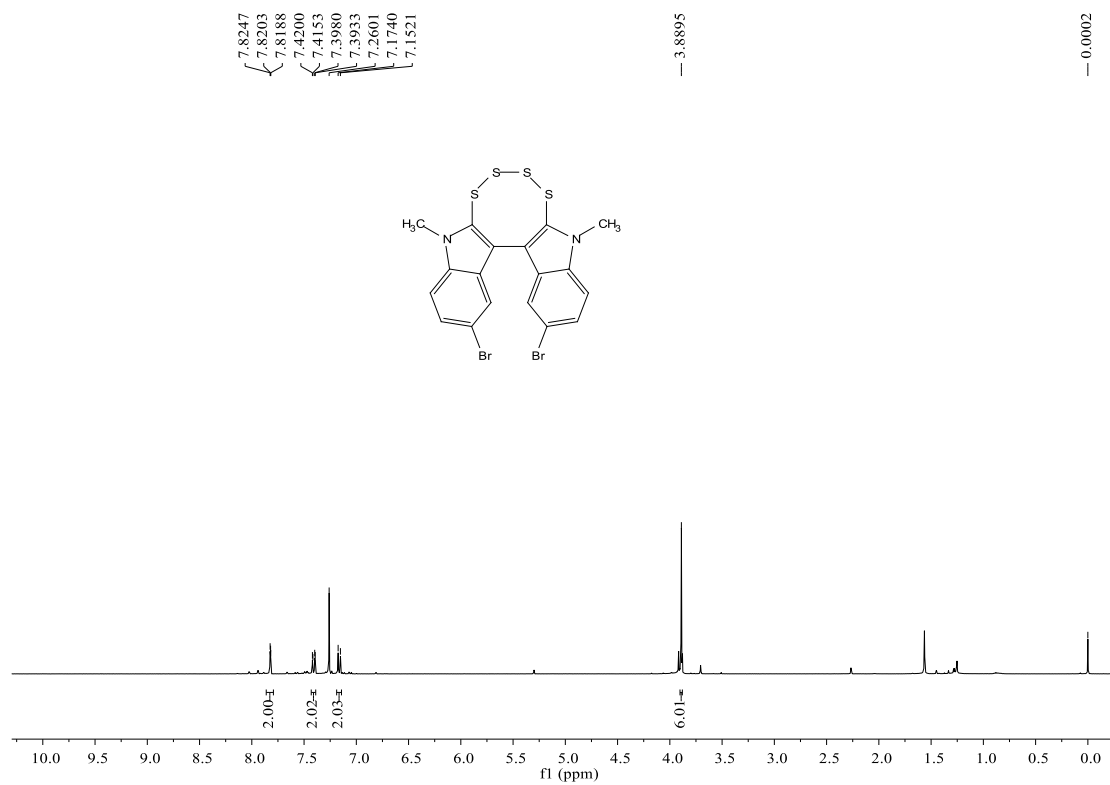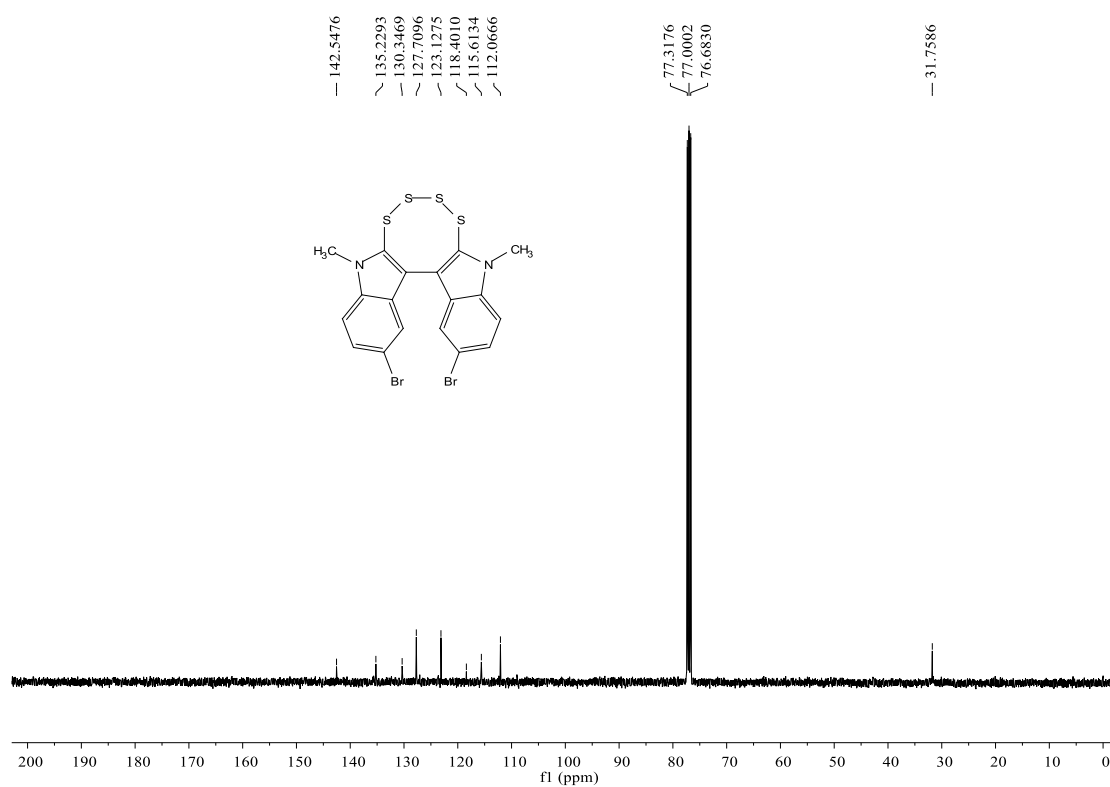

$^1\text{H}$  and  $^{13}\text{C}$  NMR spectra of **2r**

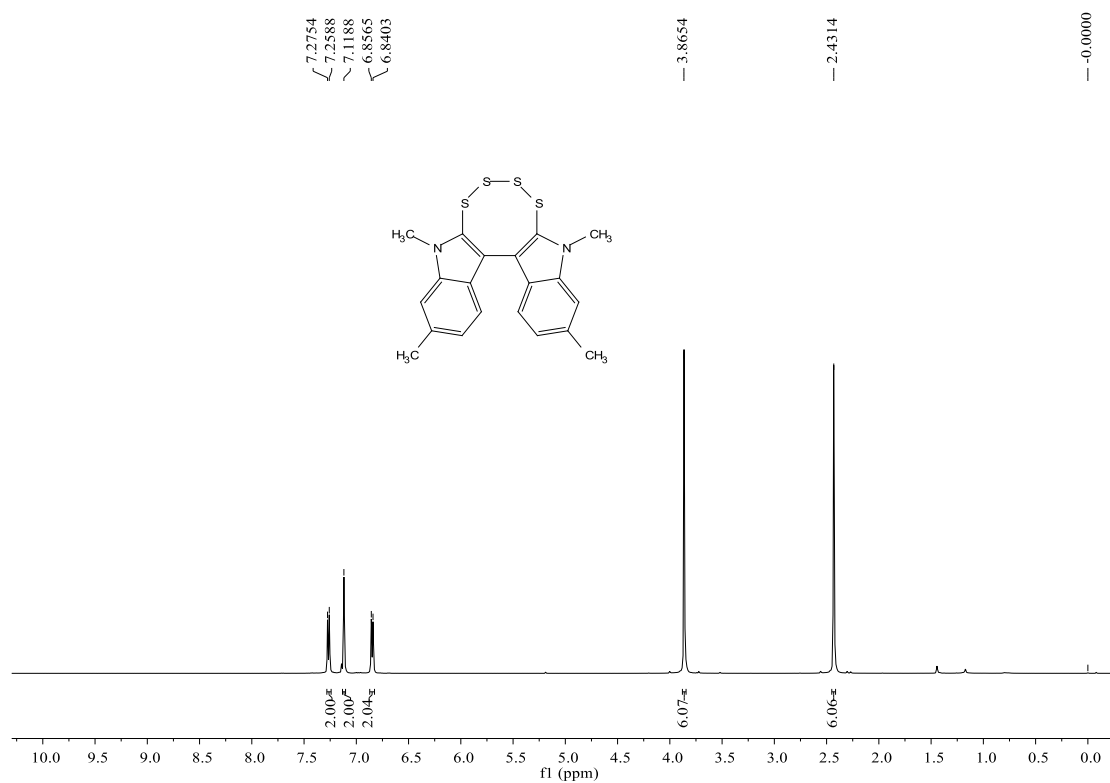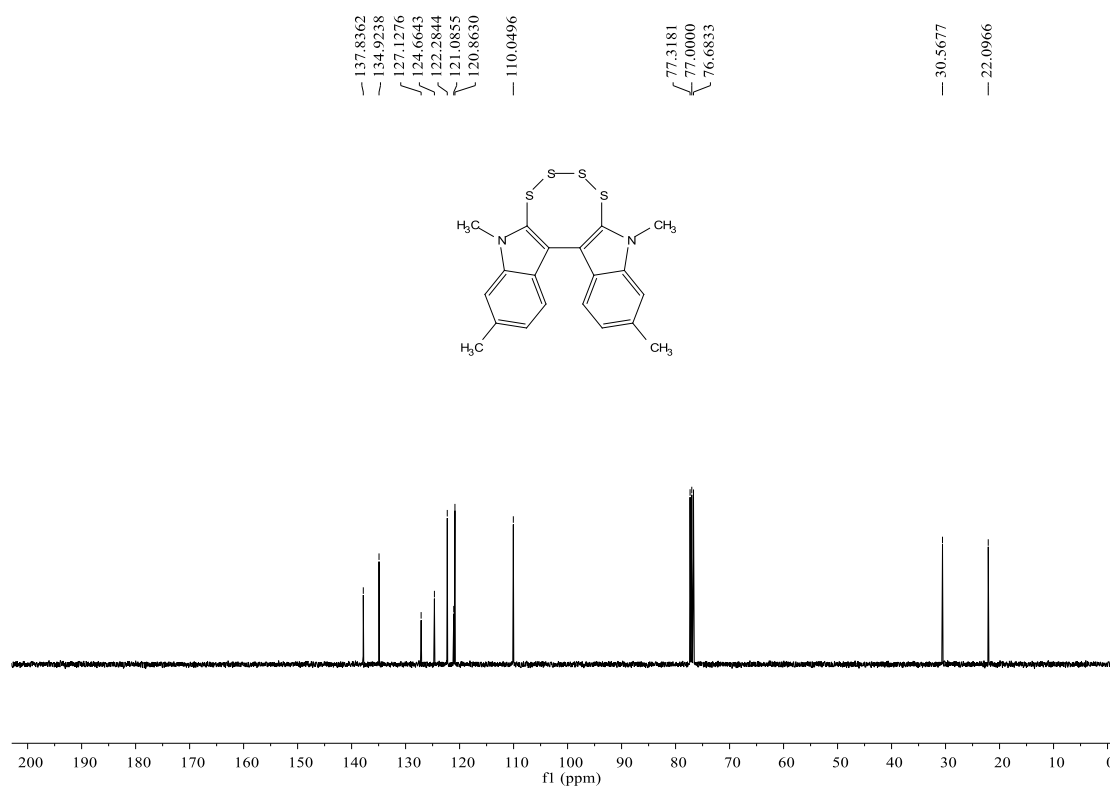

$^1\text{H}$  and  $^{13}\text{C}$  NMR spectra of **2s**

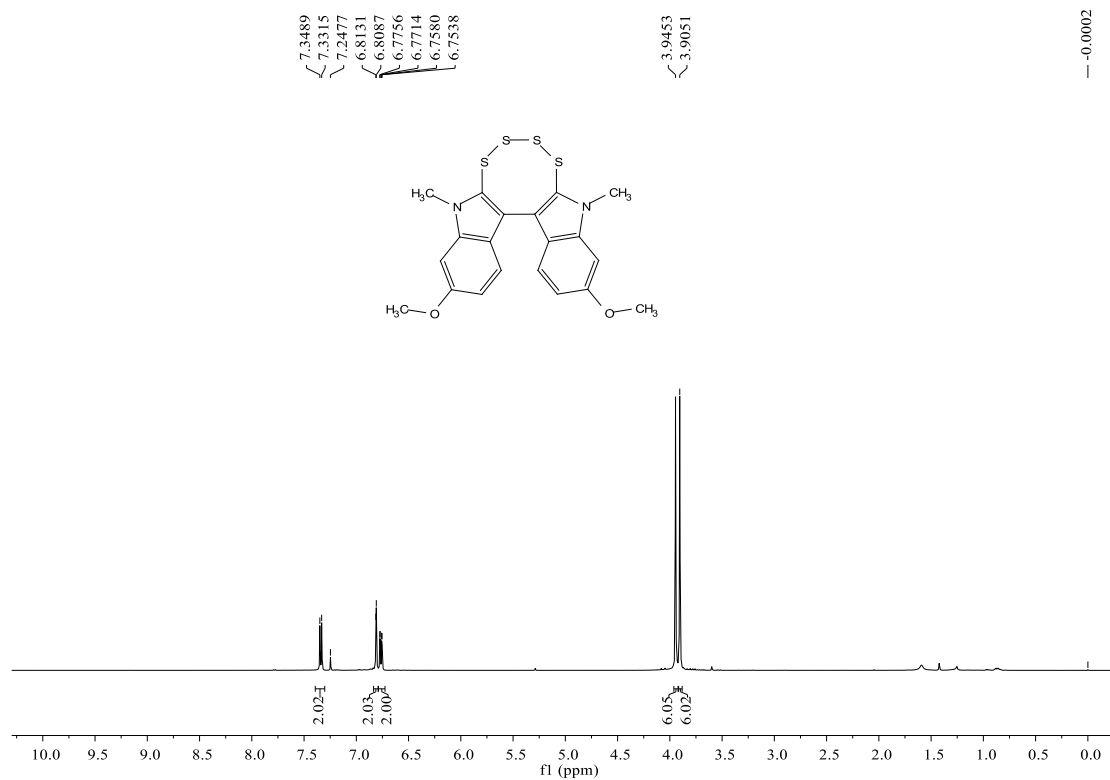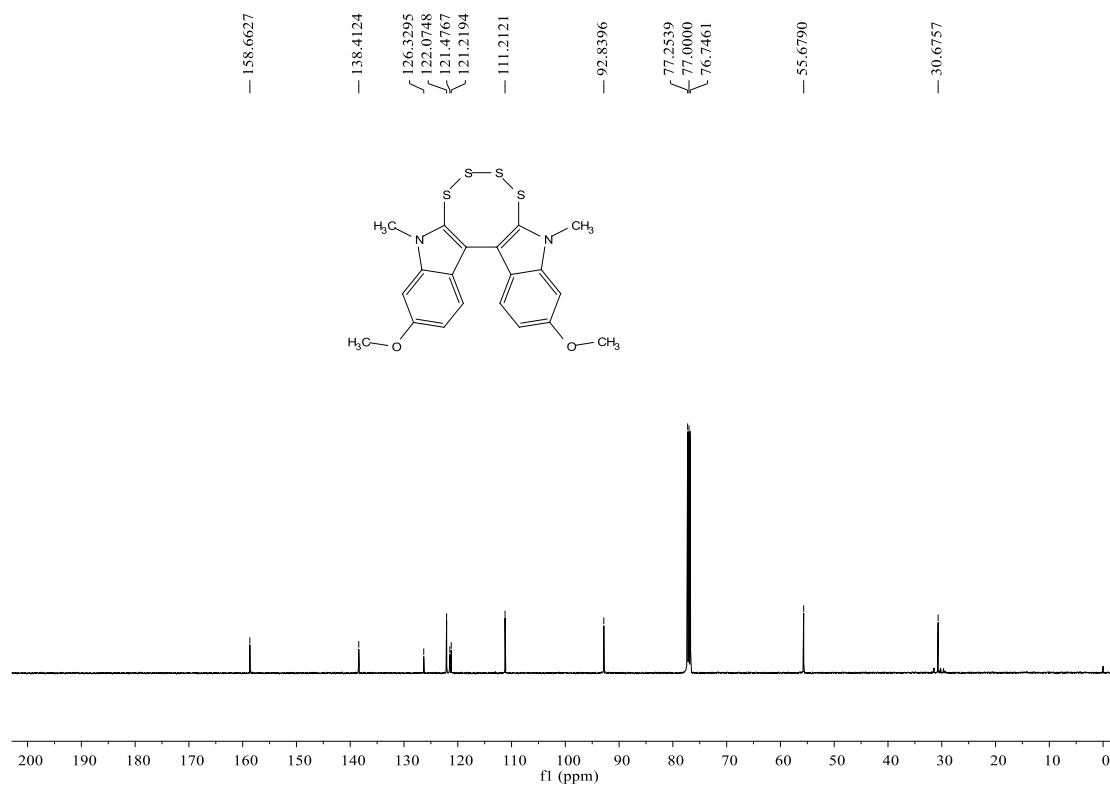

$^1\text{H}$ ,  $^{13}\text{C}$  and  $^{19}\text{F}$  NMR spectra of **2t**

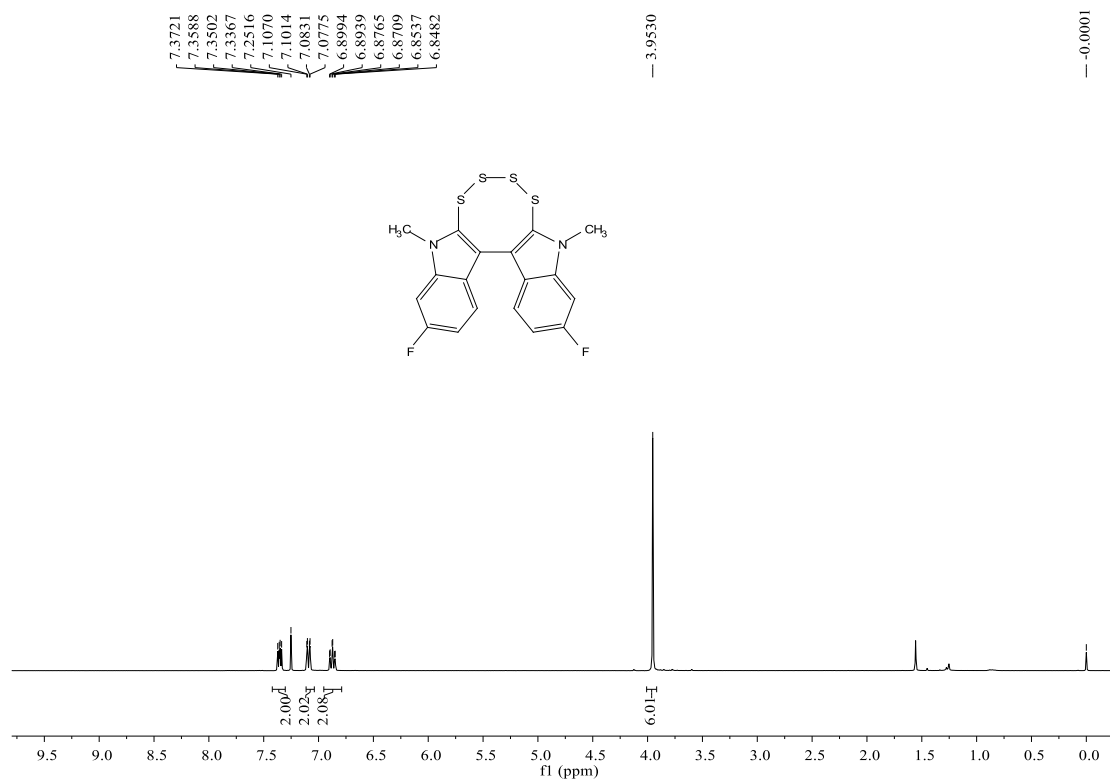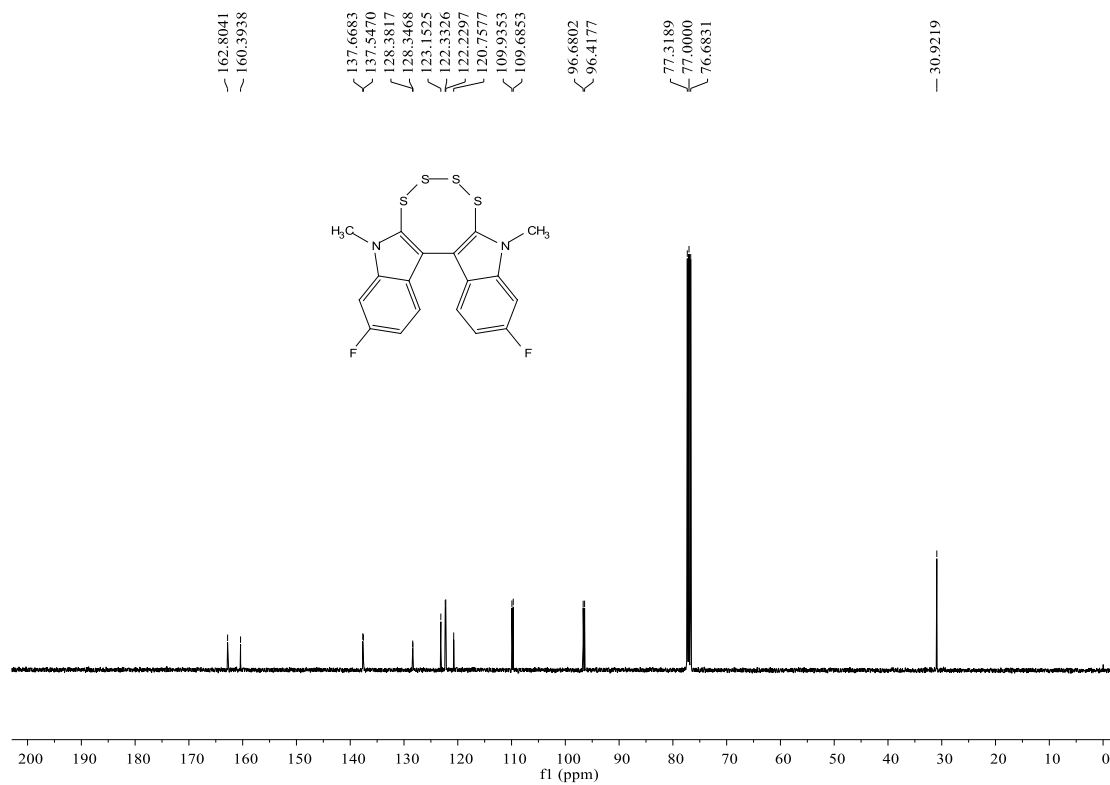

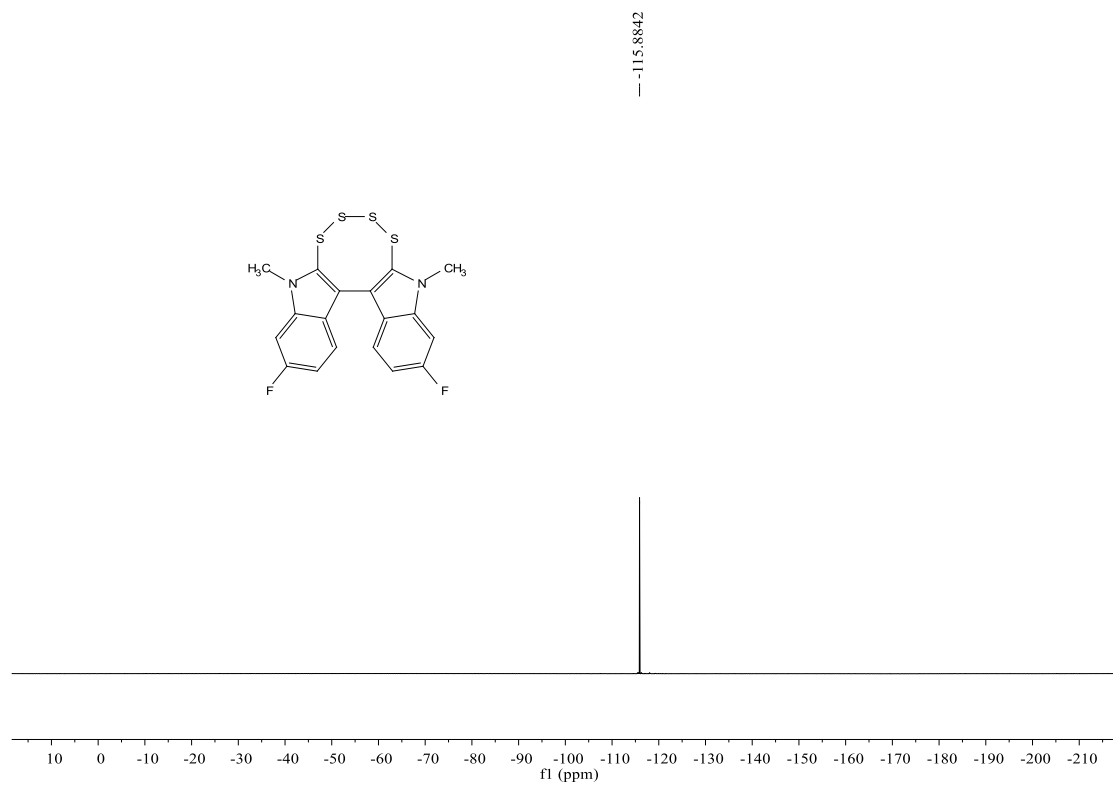

H and <sup>13</sup>C NMR spectra of **2u**

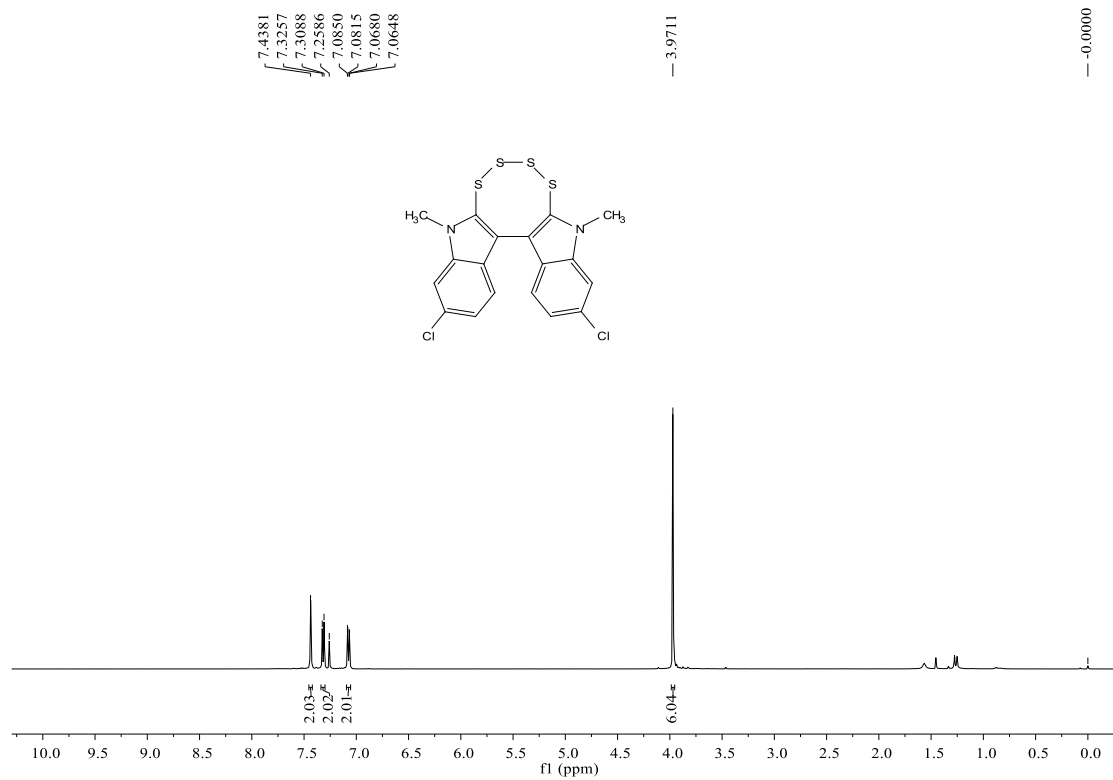

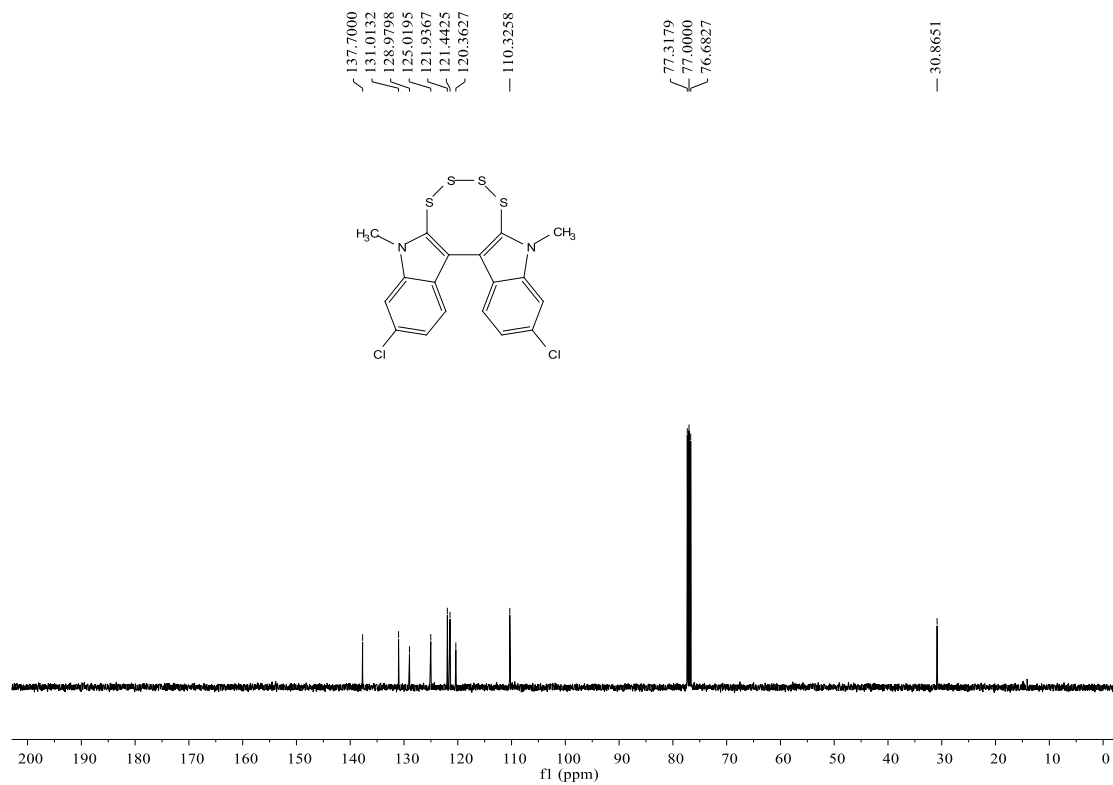

$^1\text{H}$  and  $^{13}\text{C}$  NMR spectra of 2v

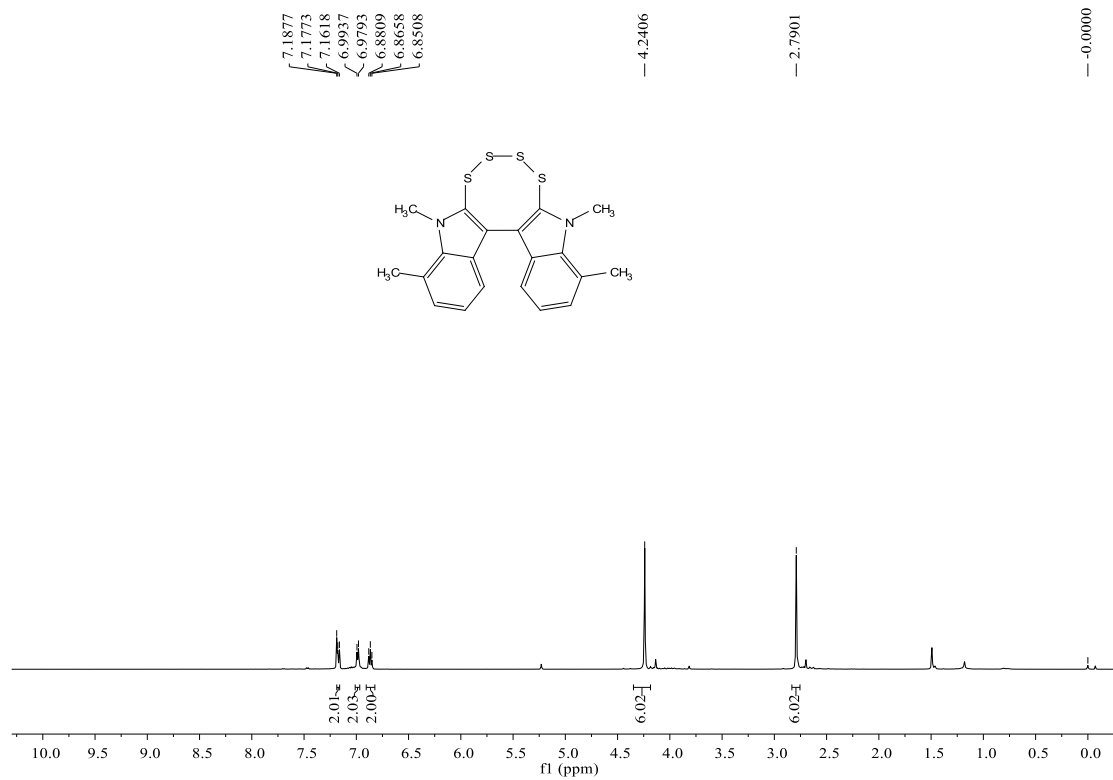



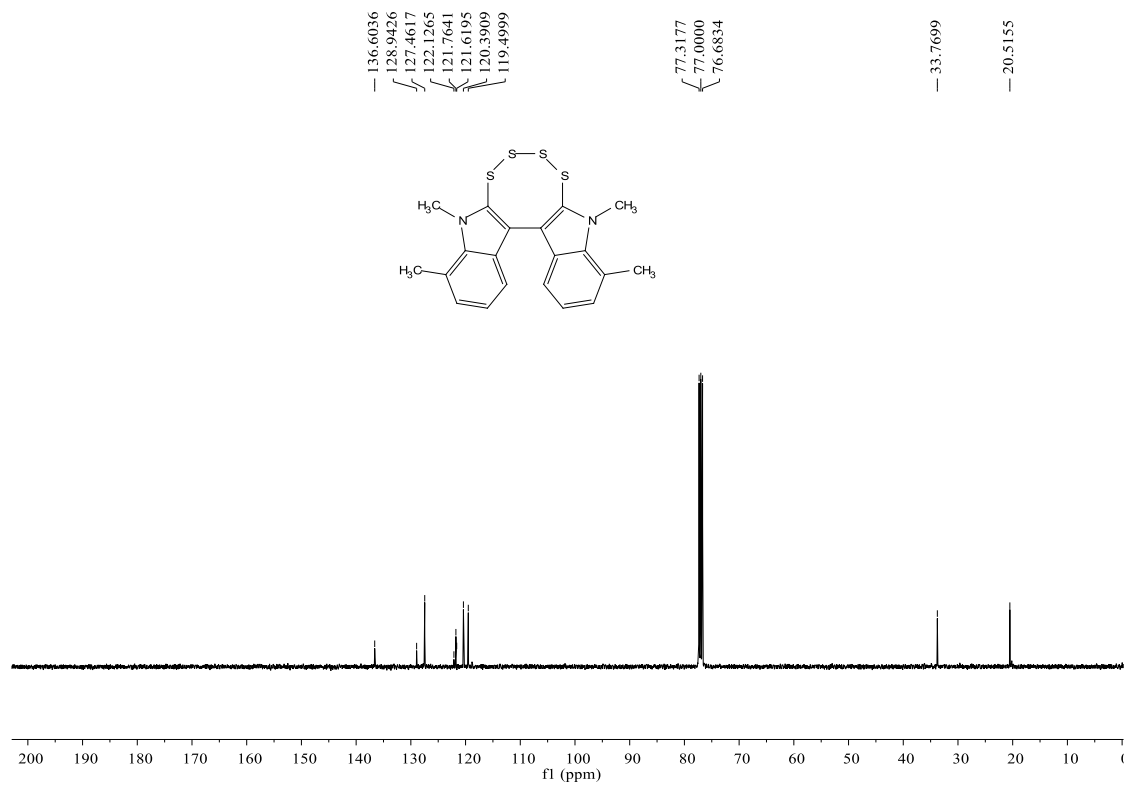

<sup>1</sup>H and <sup>13</sup>C NMR spectra of **2w**

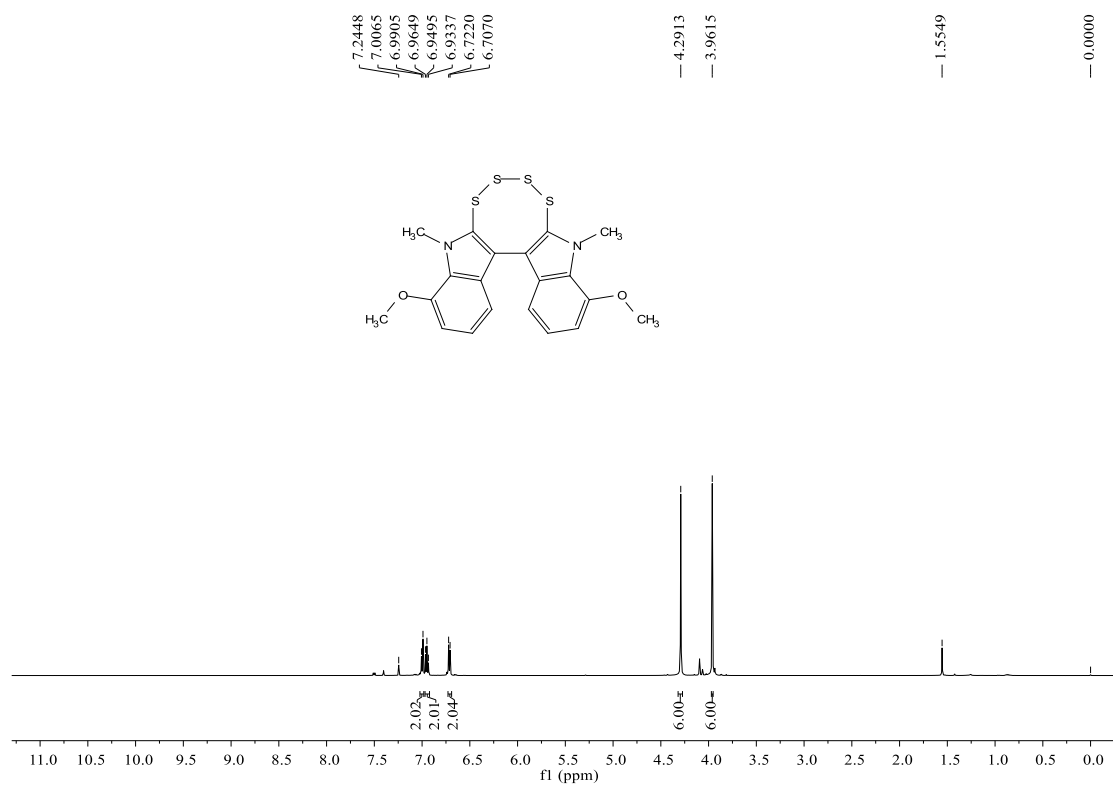

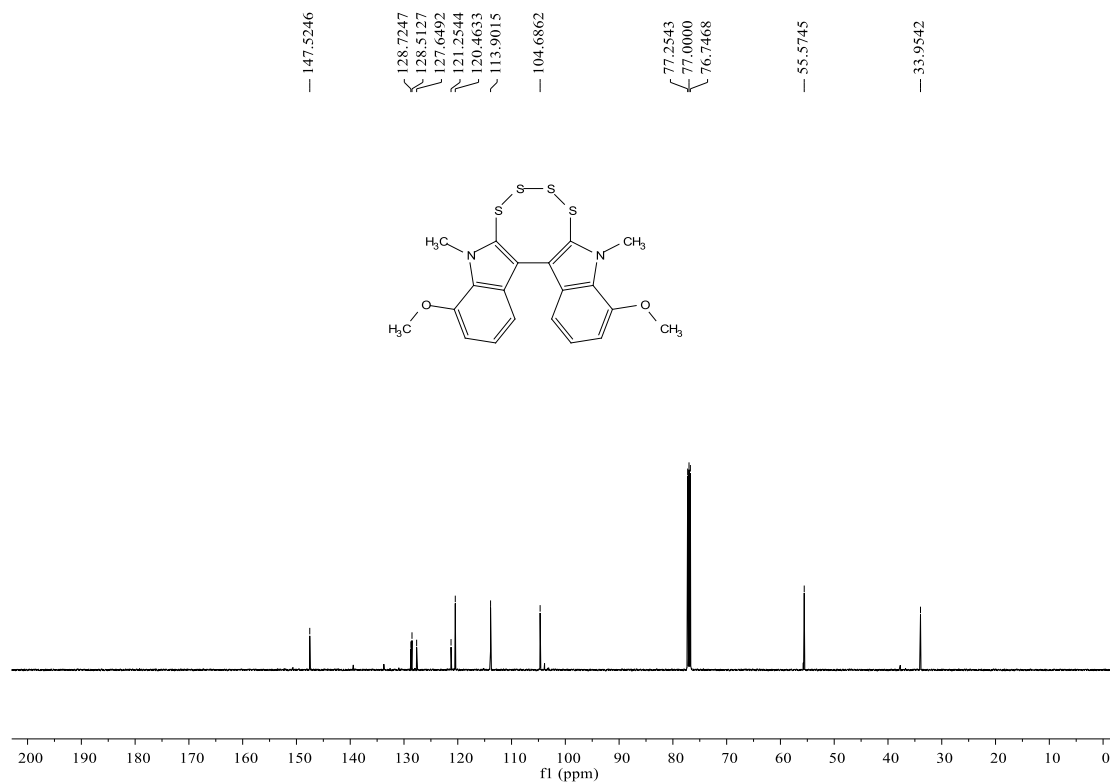

<sup>1</sup>H and <sup>13</sup>C NMR spectra of **2x**

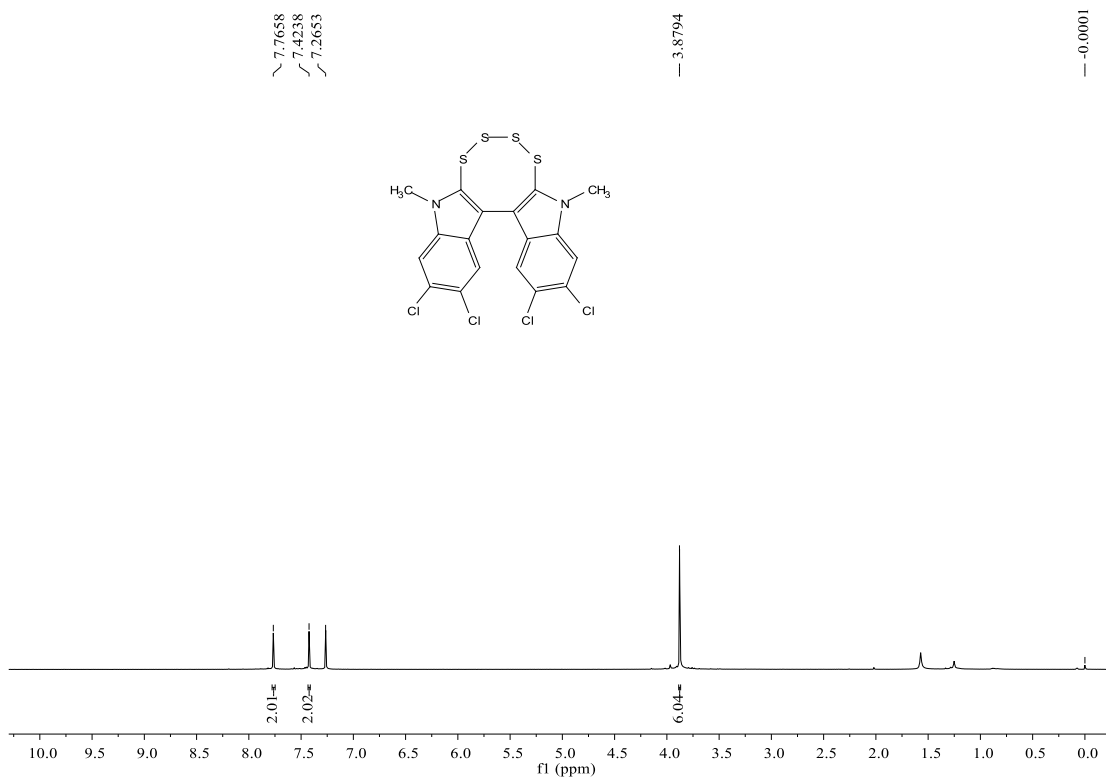

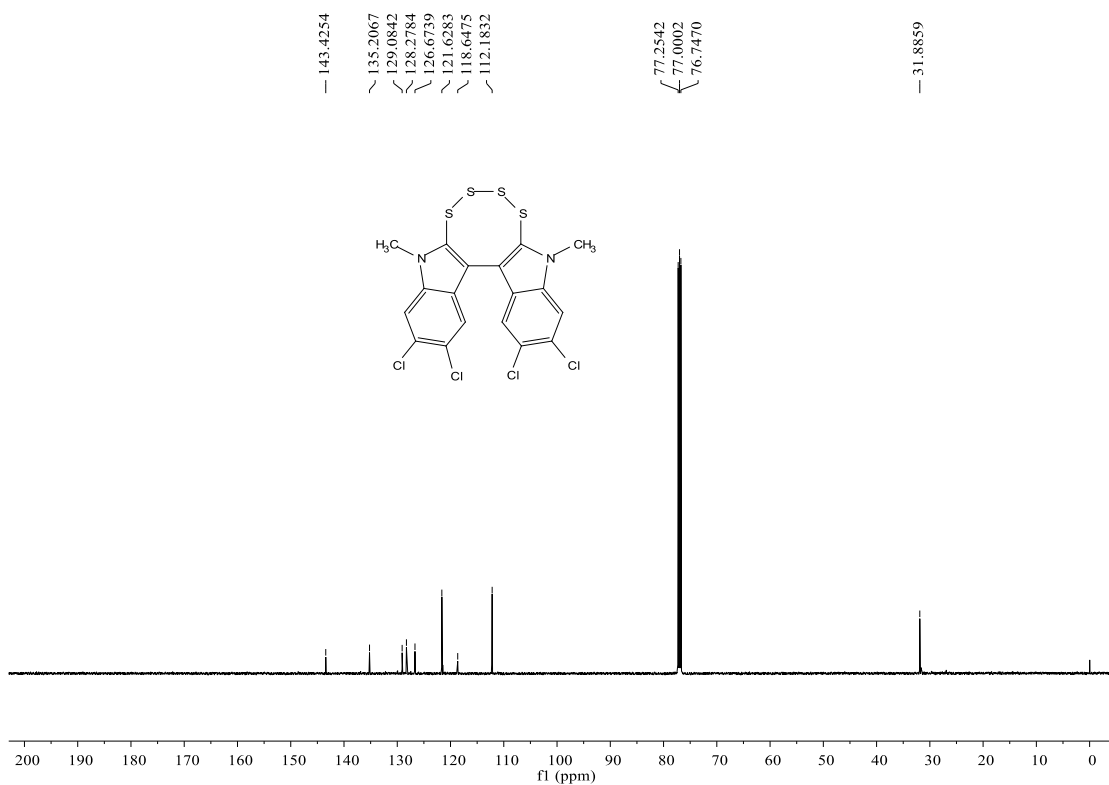

$^1\text{H}$  and  $^{13}\text{C}$  NMR spectra of **2y**

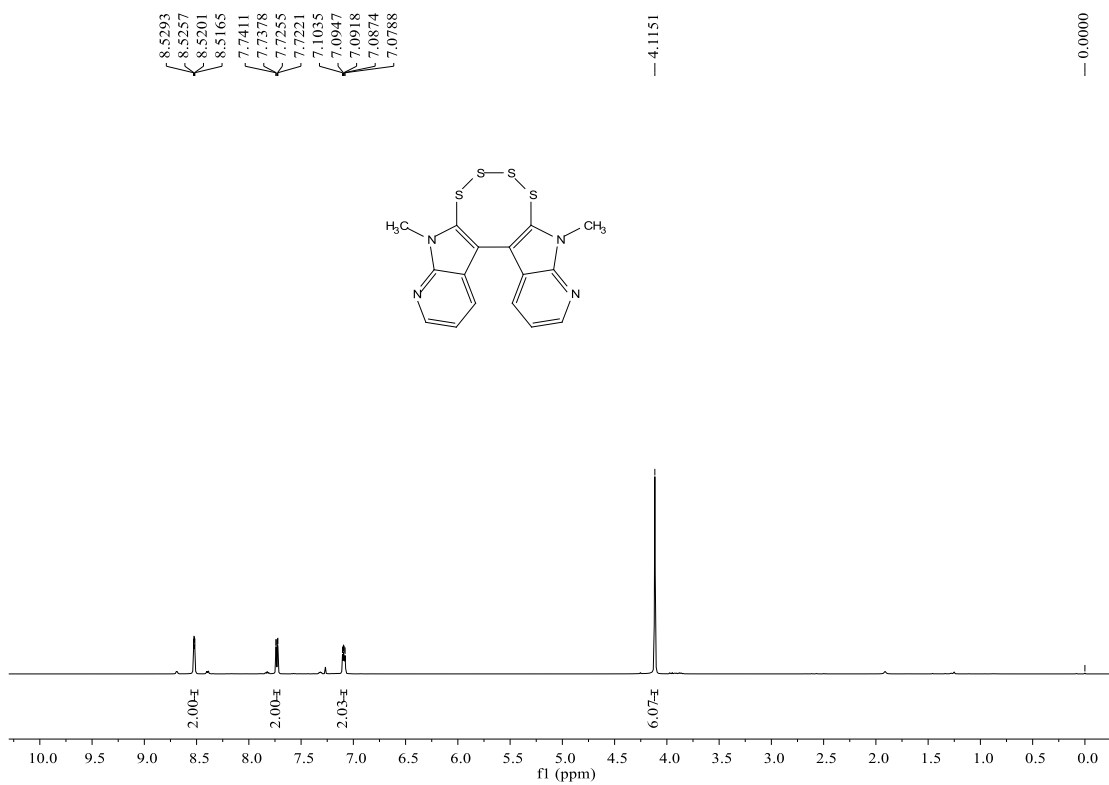

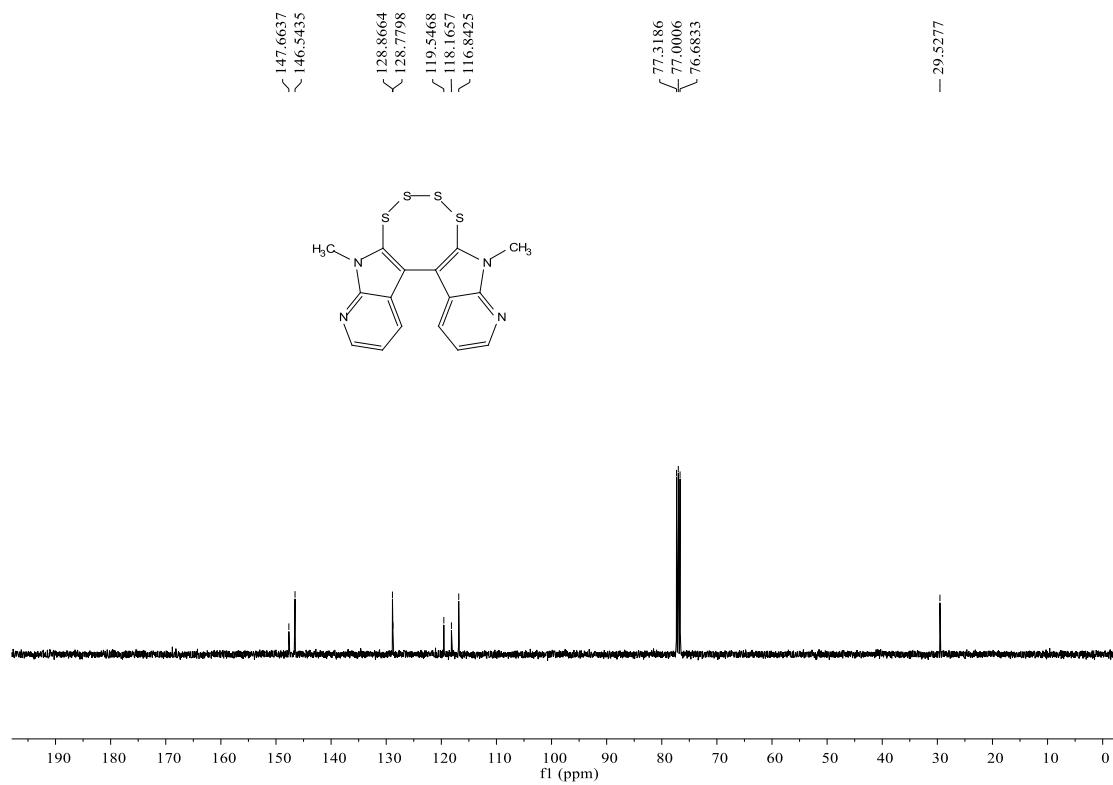

$^1\text{H}$  and  $^{13}\text{C}$  NMR spectra of **2z**

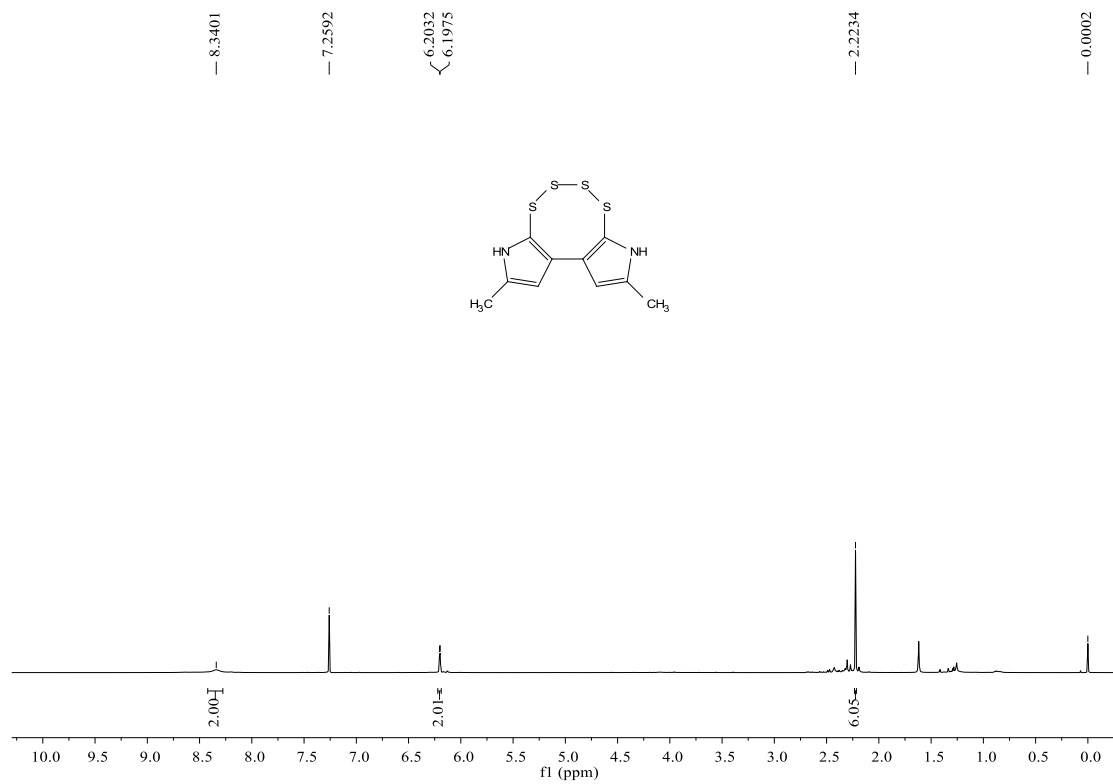

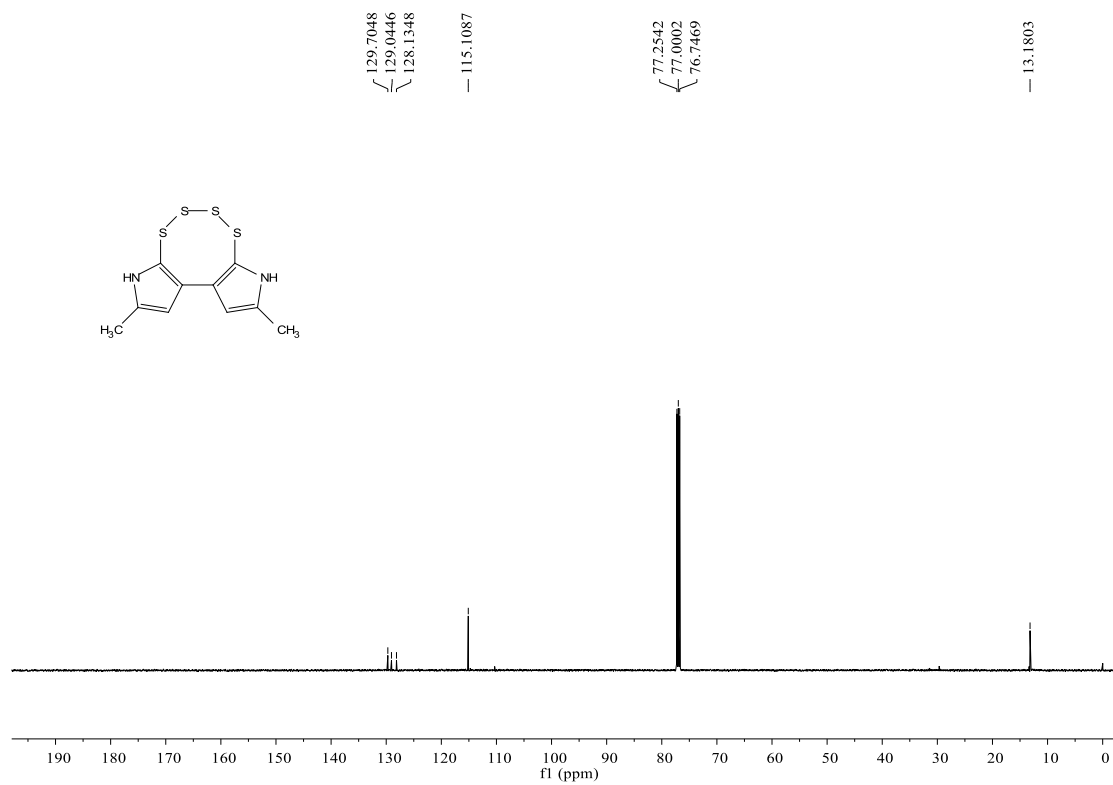

$^1\text{H}$  and  $^{13}\text{C}$  NMR spectra of **3a**

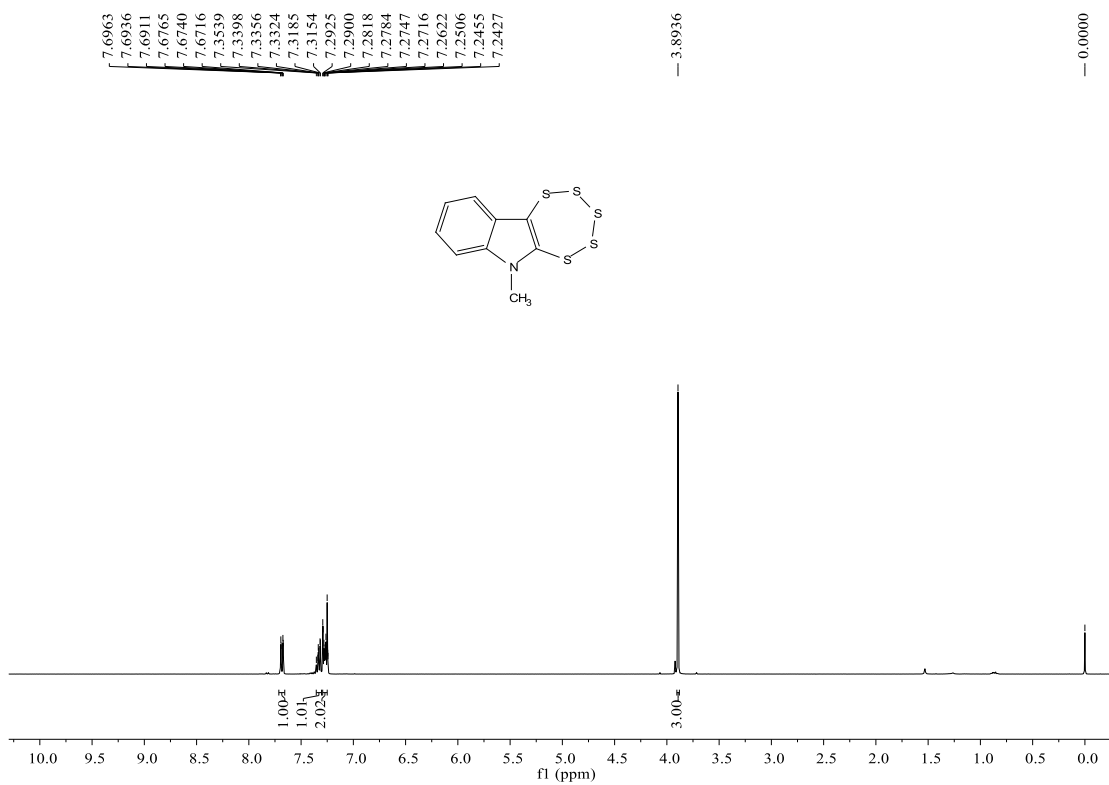

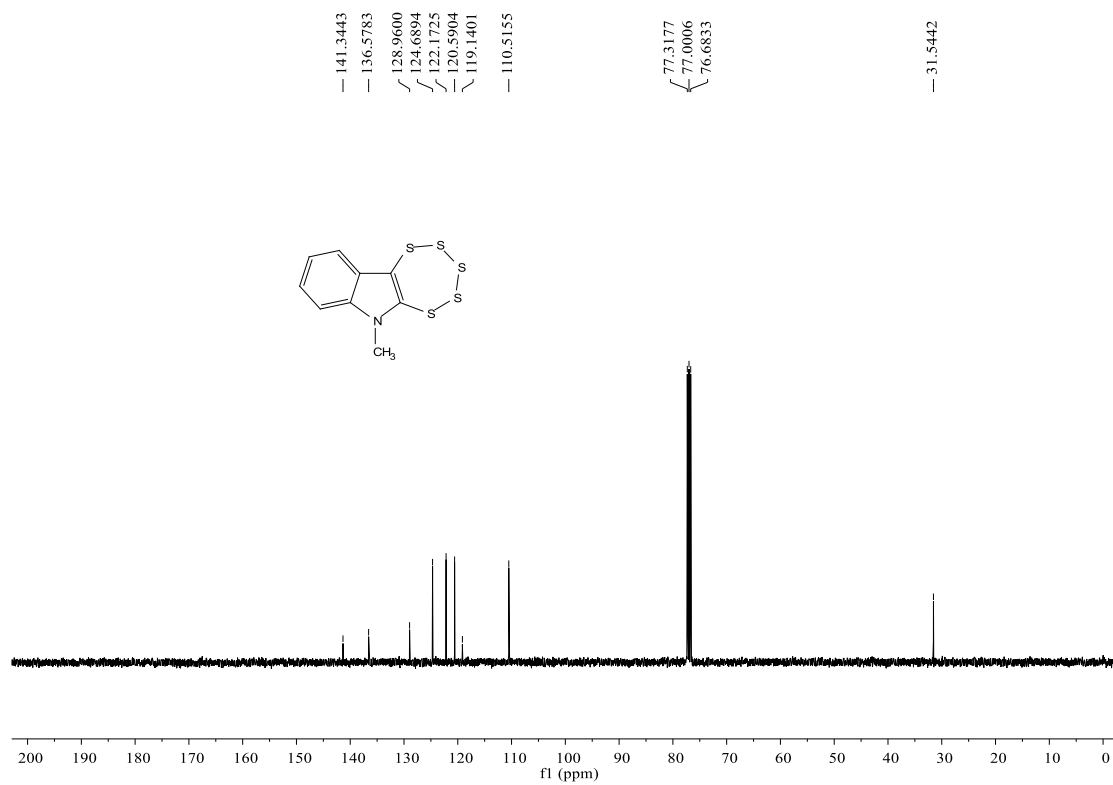

<sup>1</sup>H and <sup>13</sup>C NMR spectra of **3b**

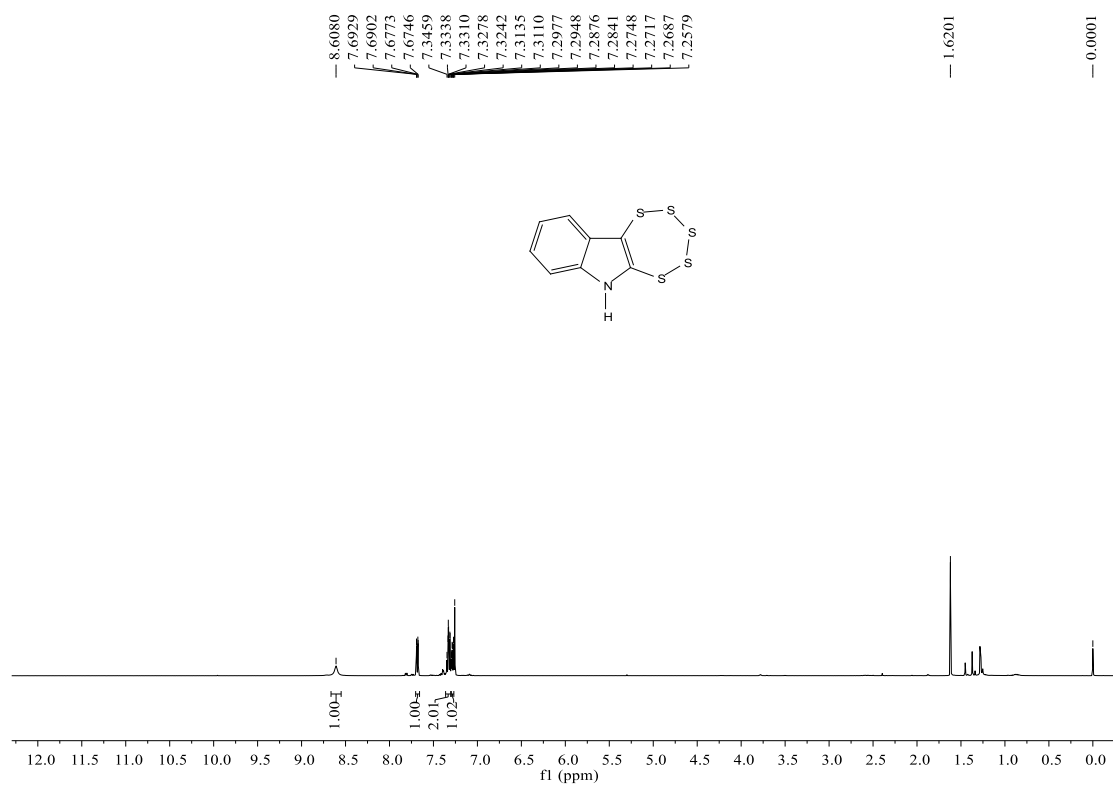

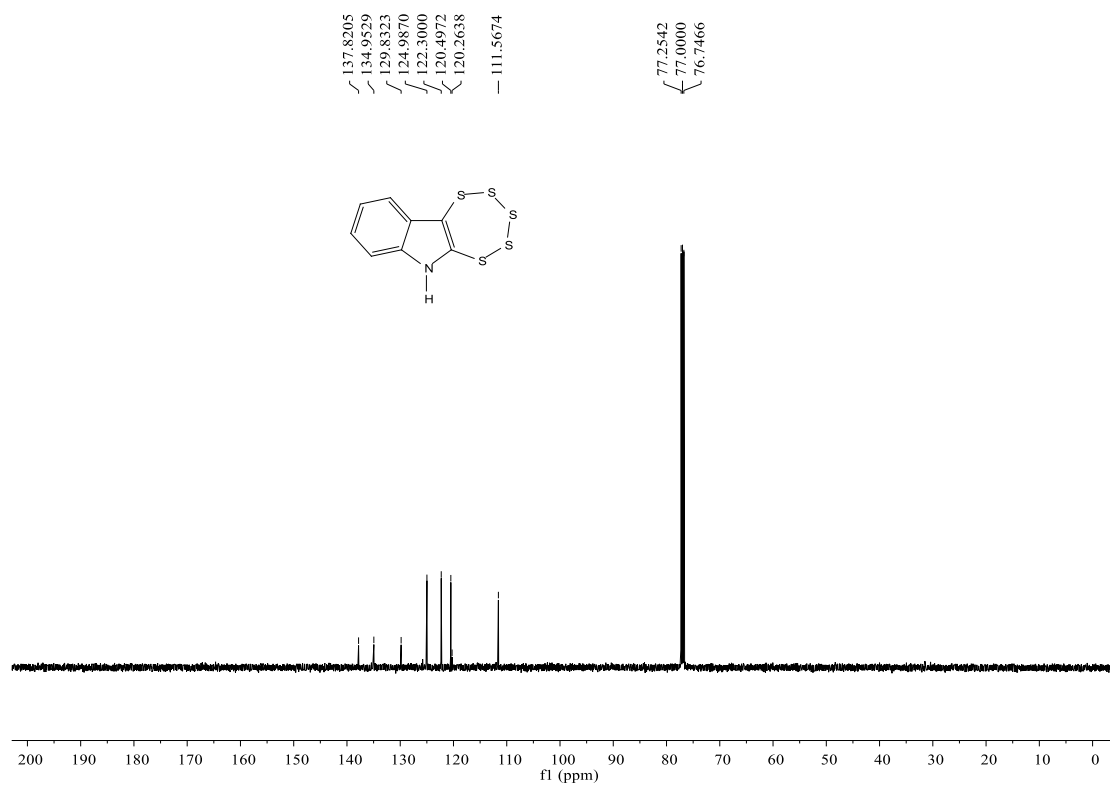

$^1\text{H}$  and  $^{13}\text{C}$  NMR spectra of **3c**

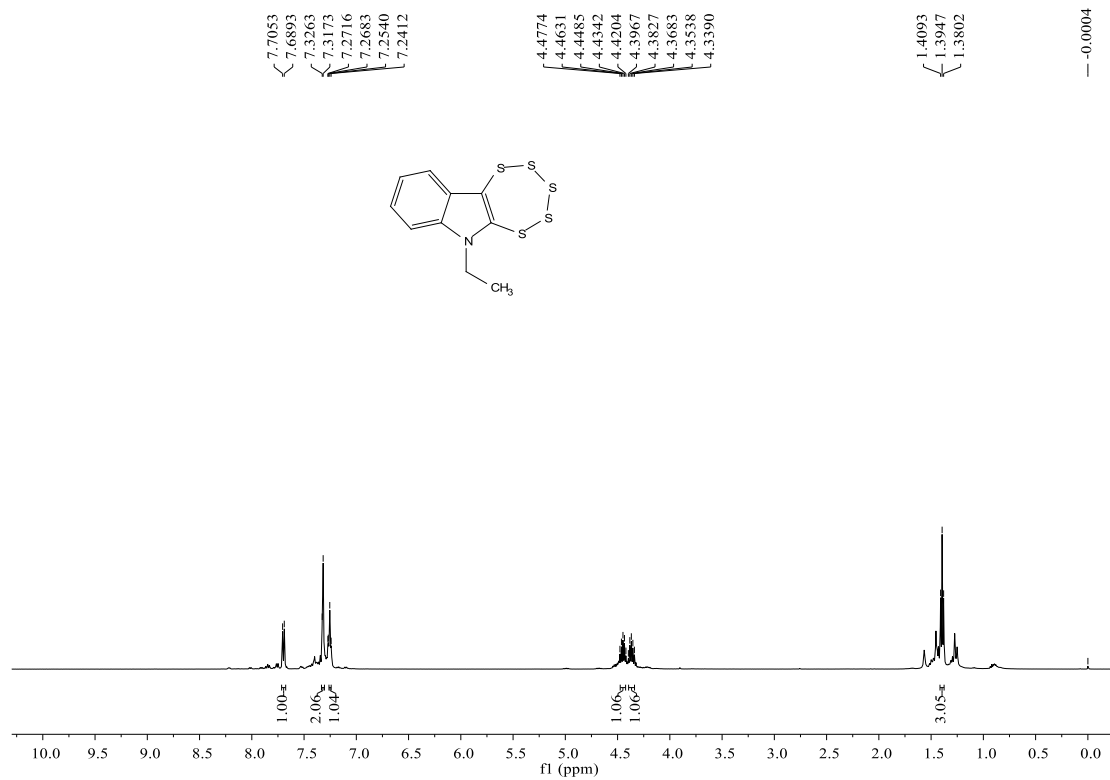

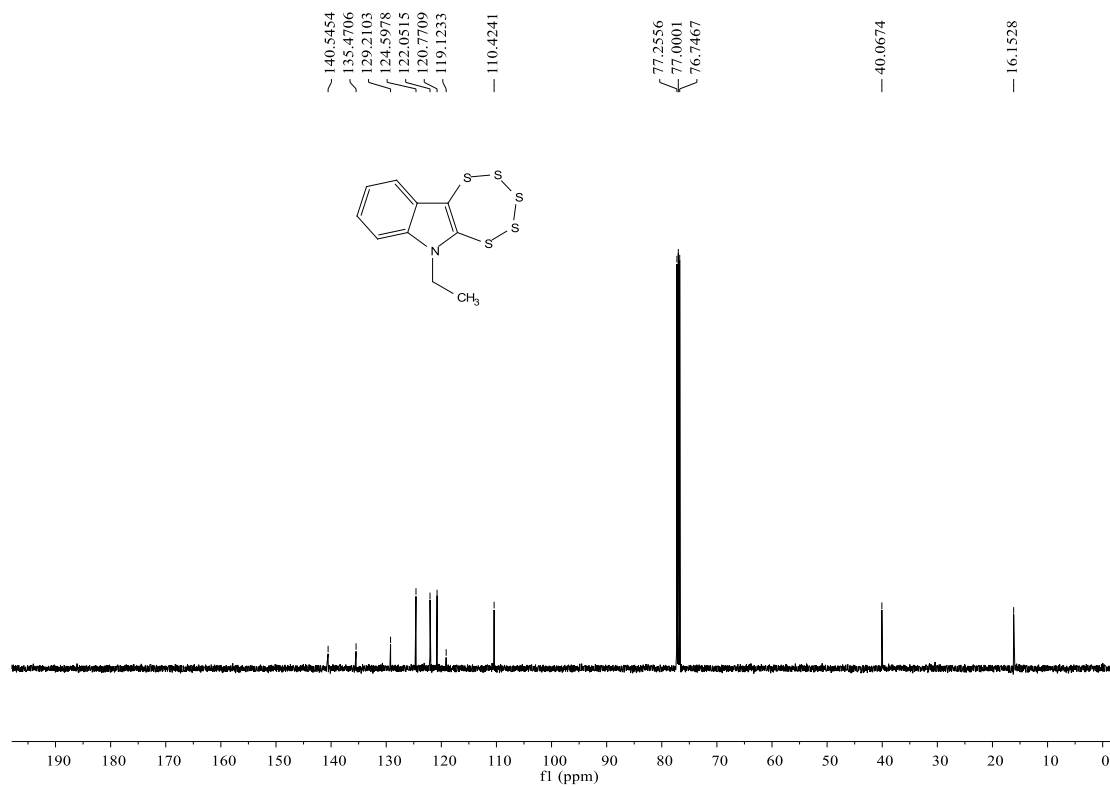

<sup>1</sup>H and <sup>13</sup>C NMR spectra of **3d**

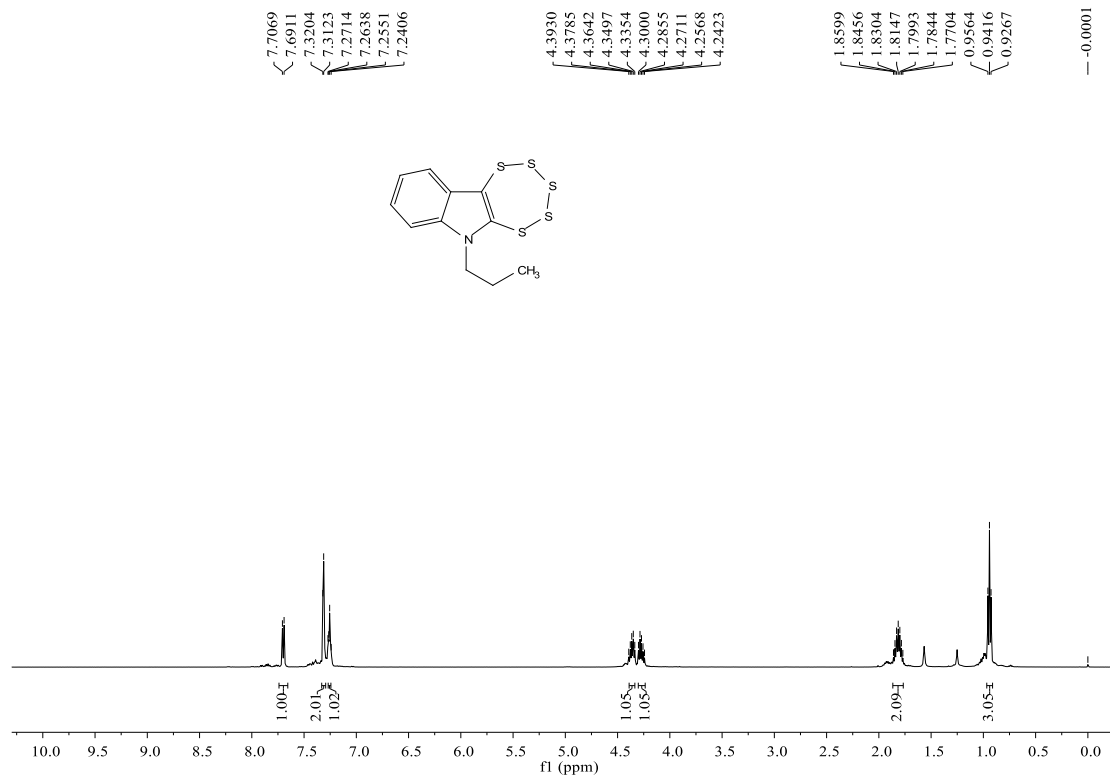



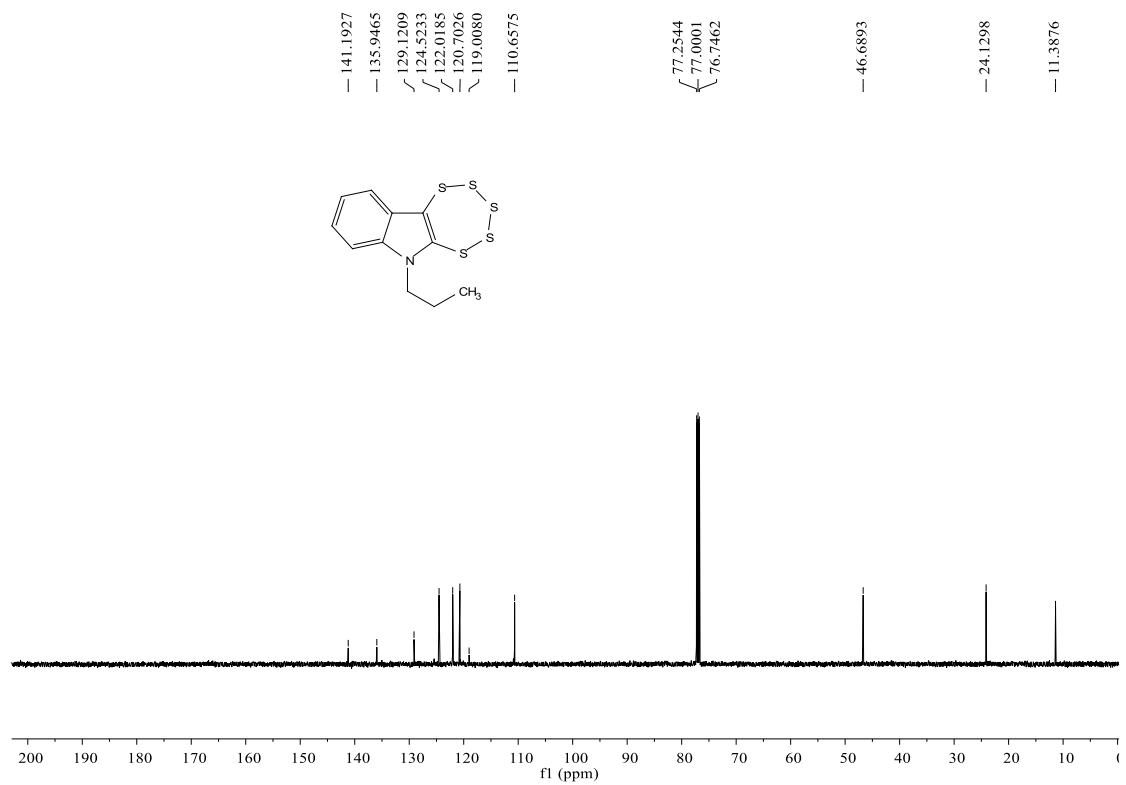

$^1\text{H}$  and  $^{13}\text{C}$  NMR spectra of 3f

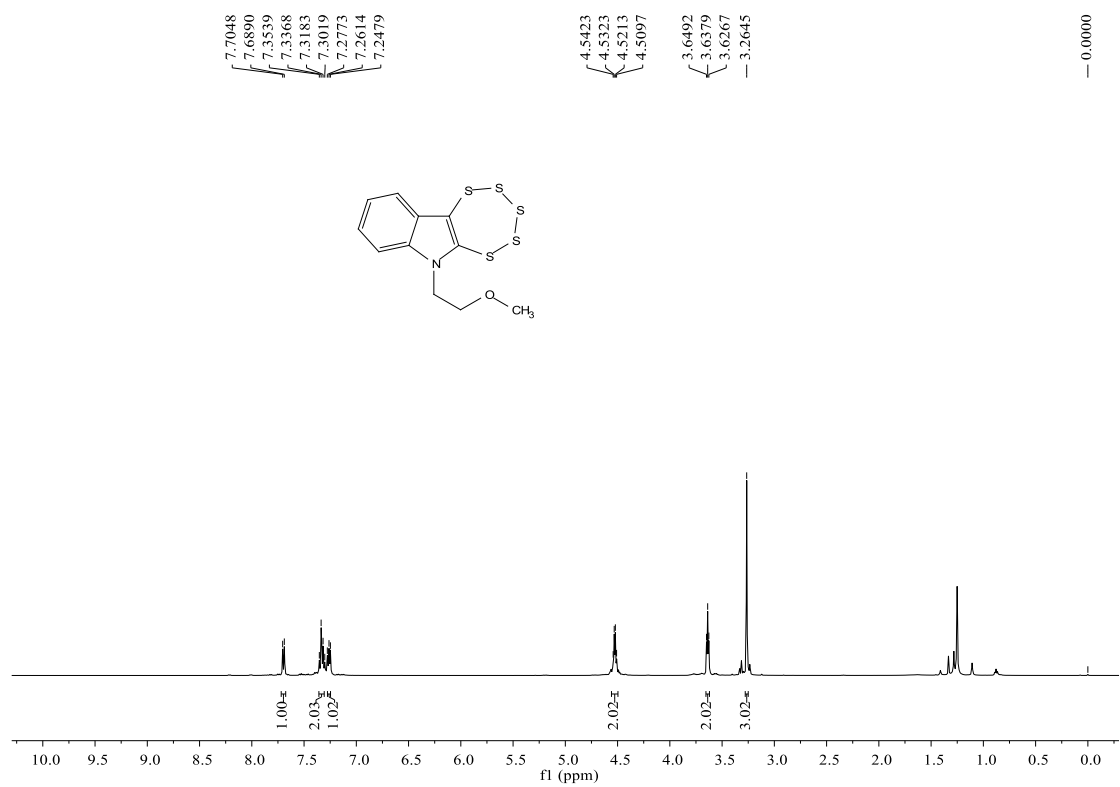

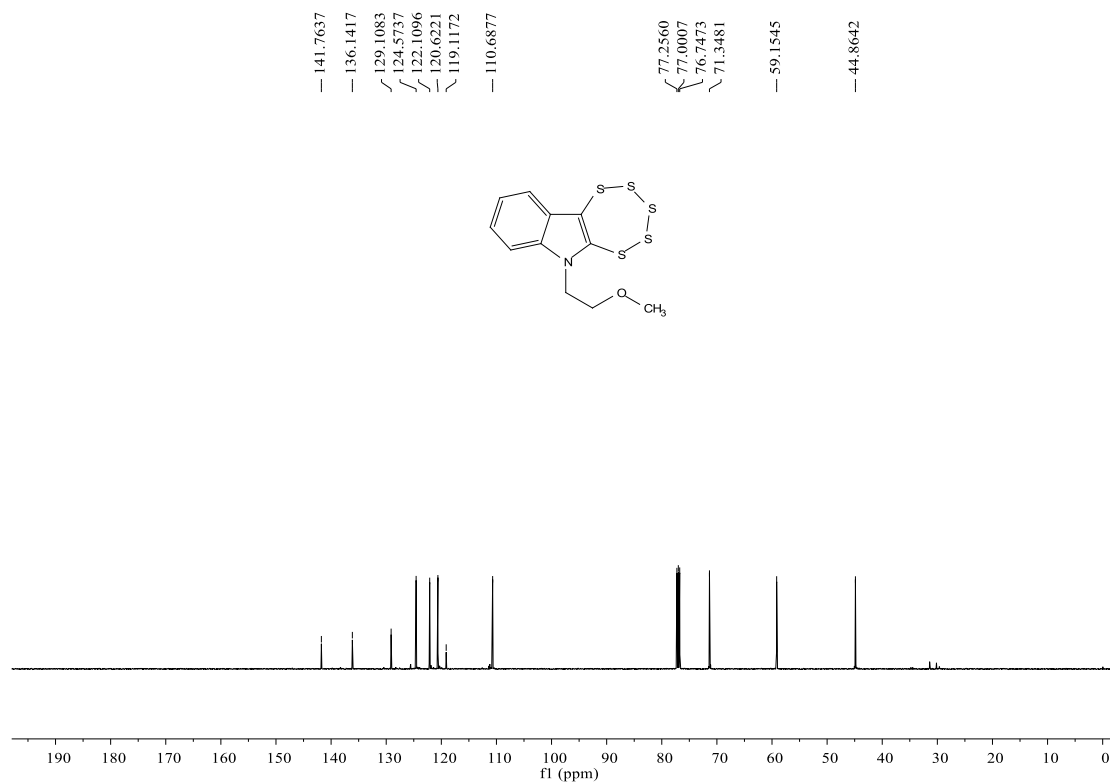

$^1\text{H}$  and  $^{13}\text{C}$  NMR spectra of **3j**

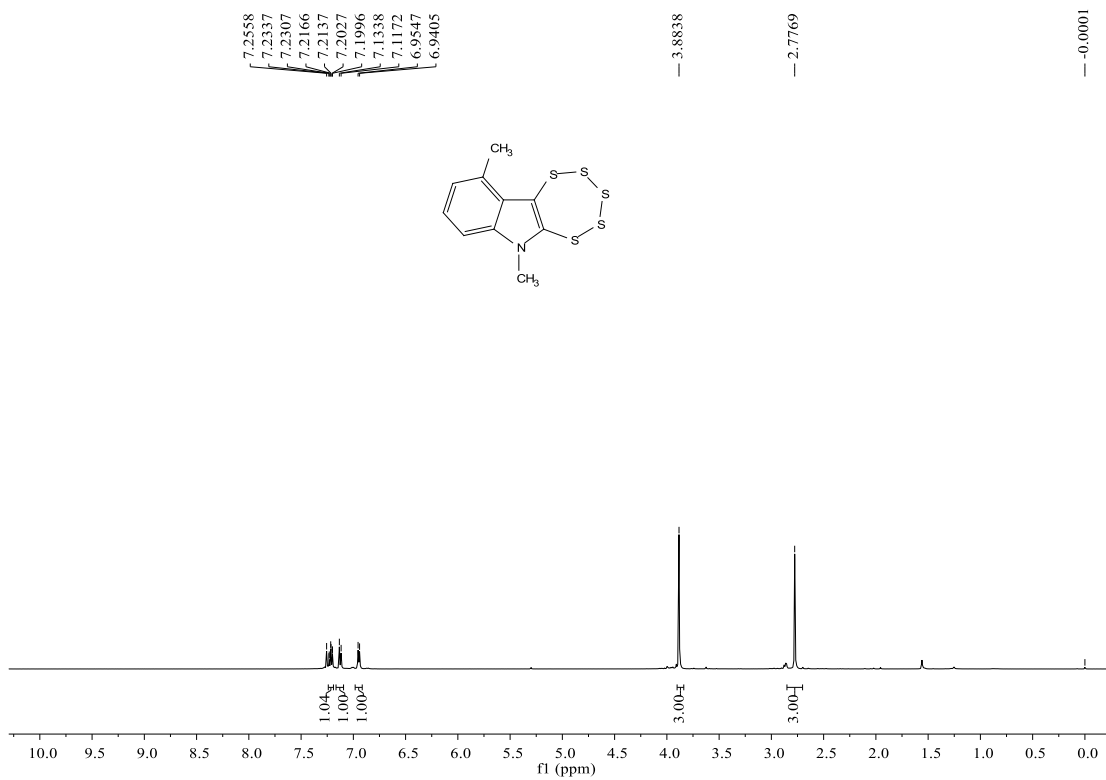

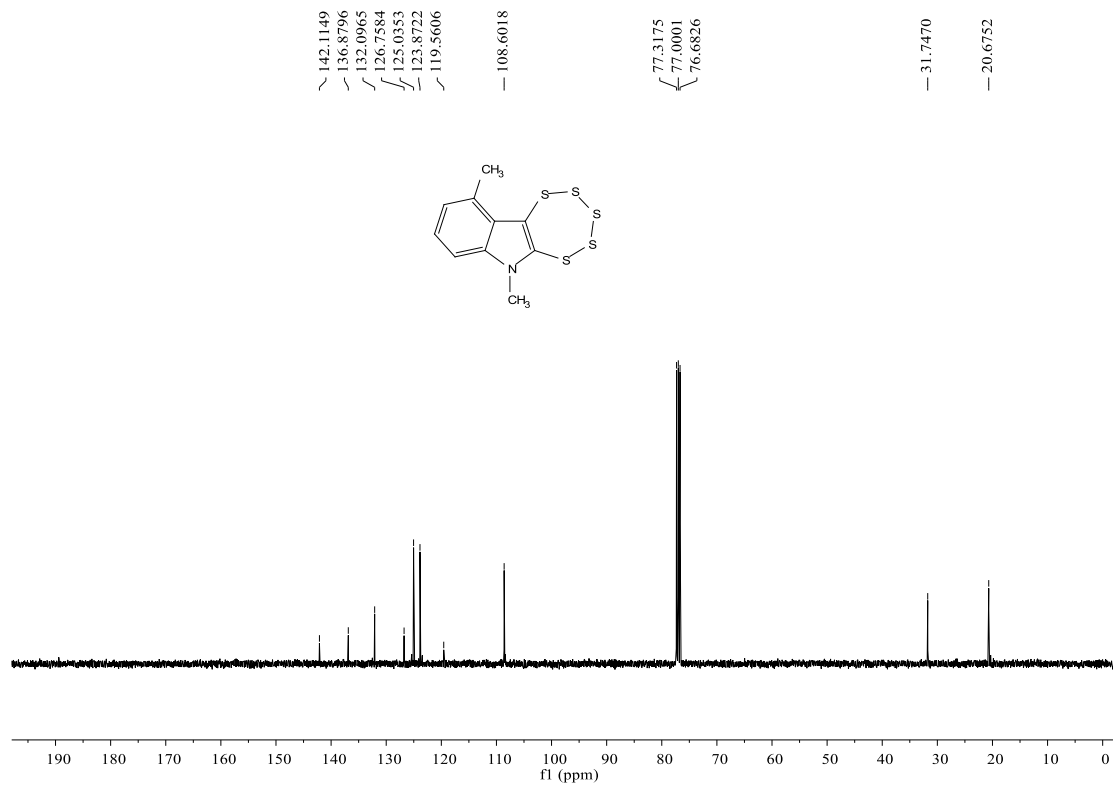

$^1\text{H}$  and  $^{13}\text{C}$  NMR spectra of **31**

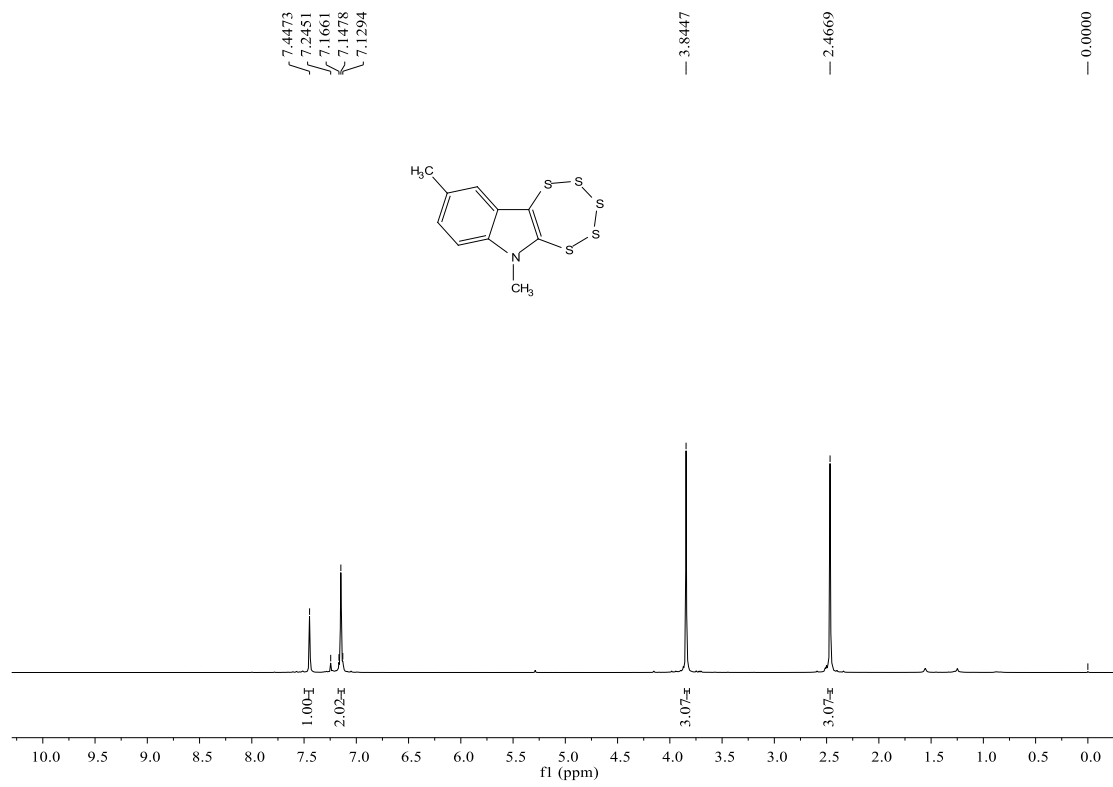

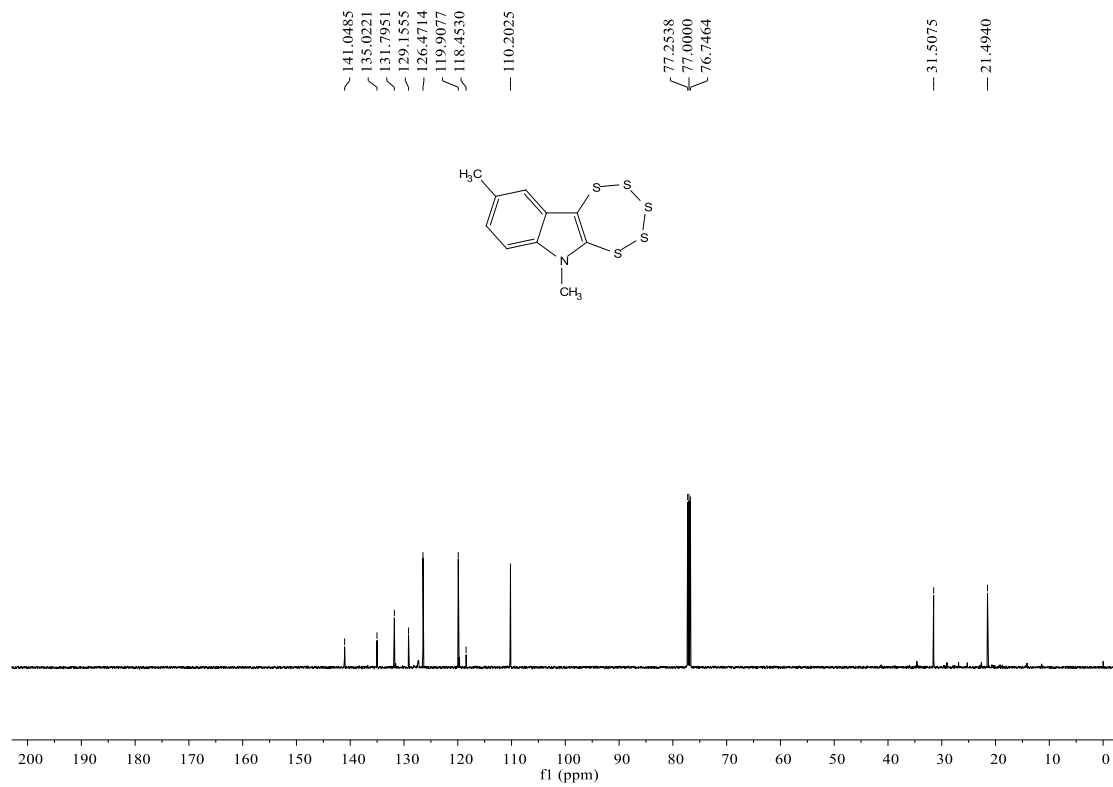

$^1\text{H}$  and  $^{13}\text{C}$  NMR spectra of **3m**

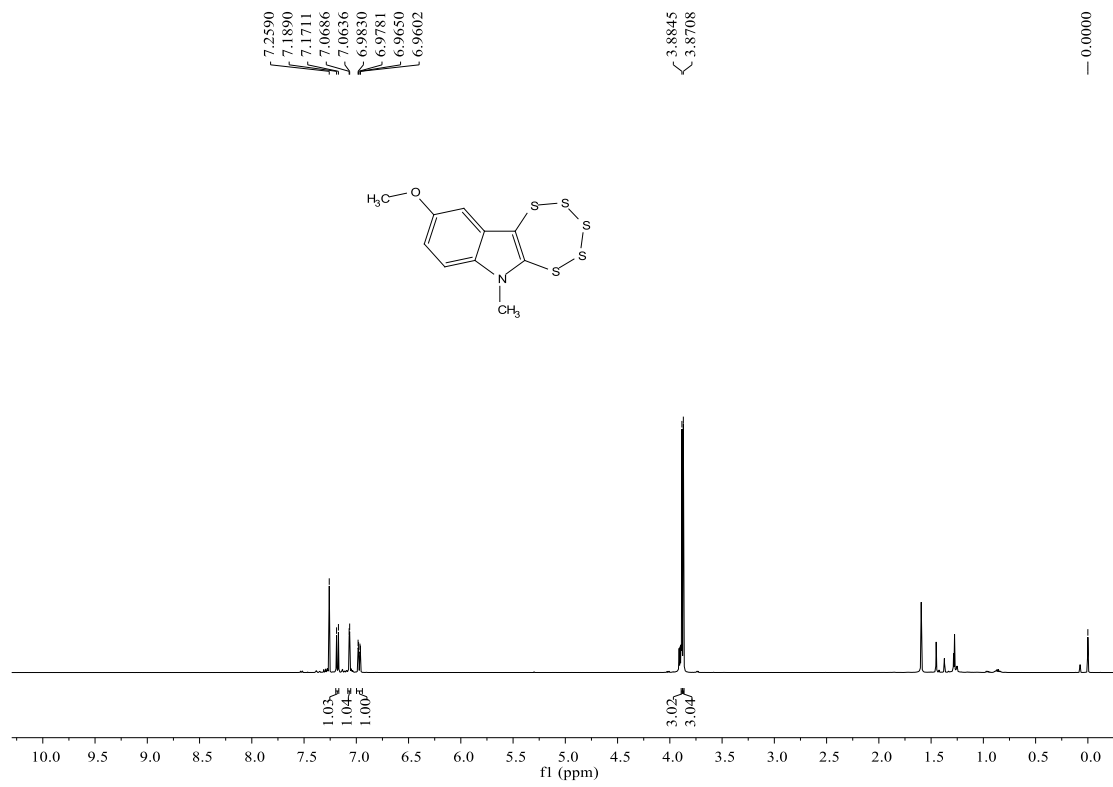

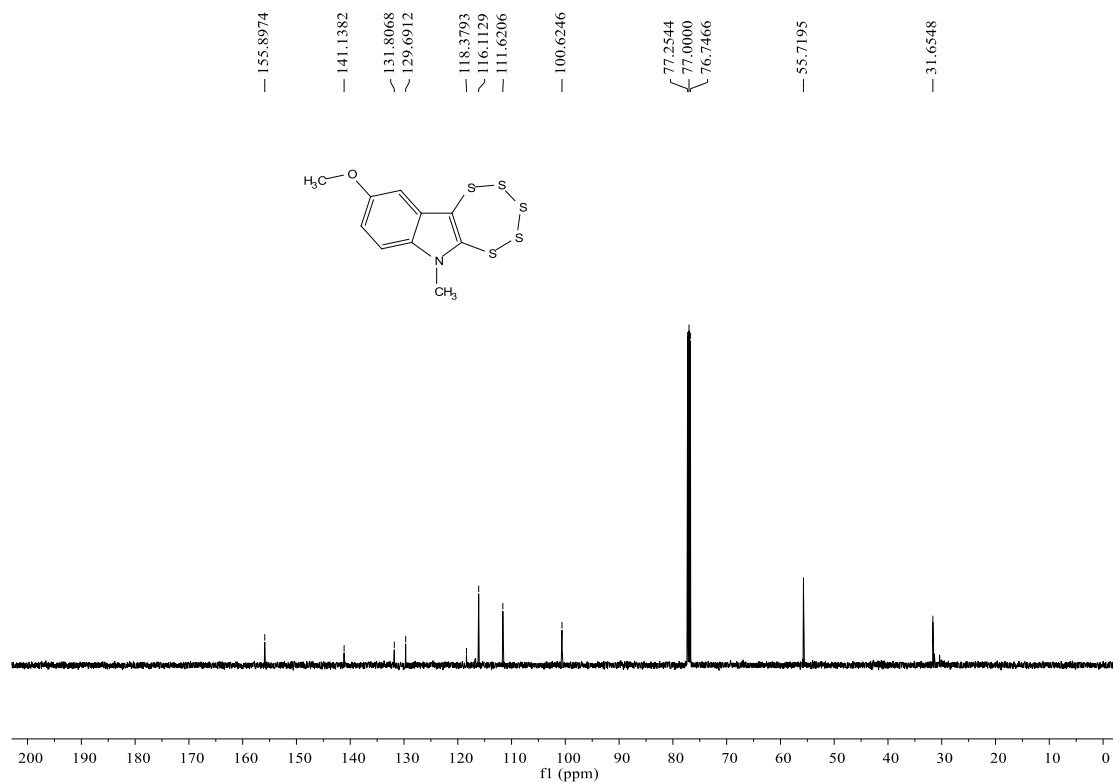

$^1\text{H}$  and  $^{13}\text{C}$  NMR spectra of 3n

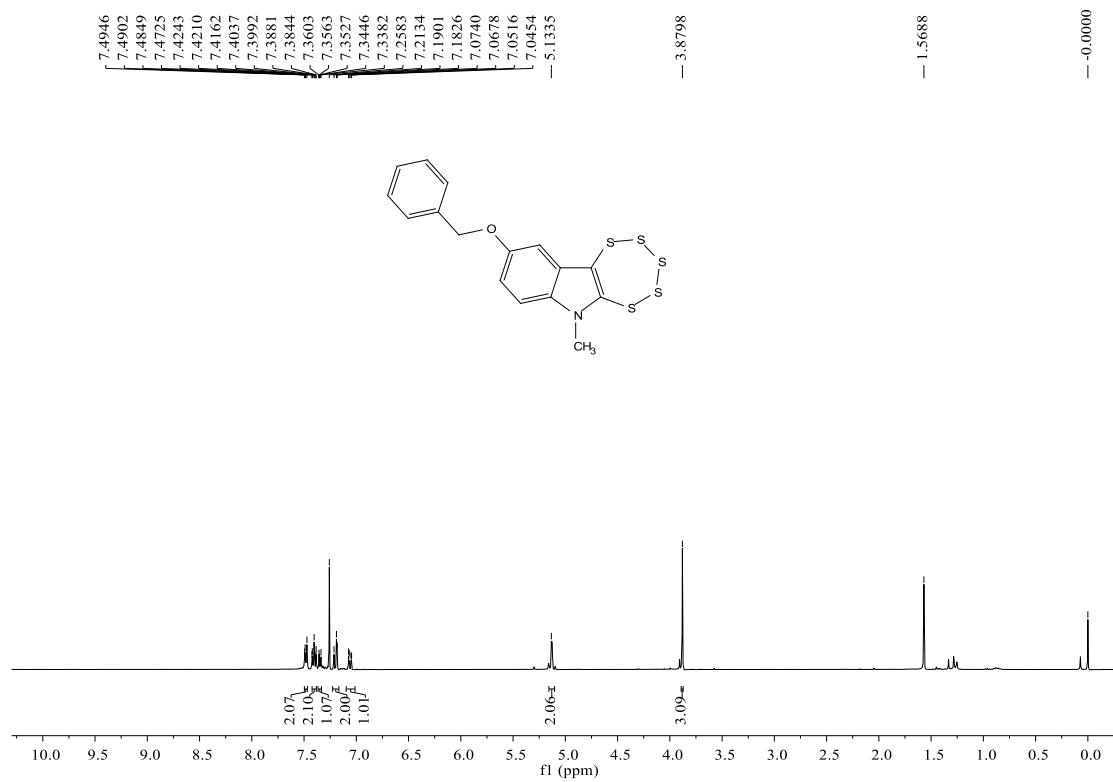

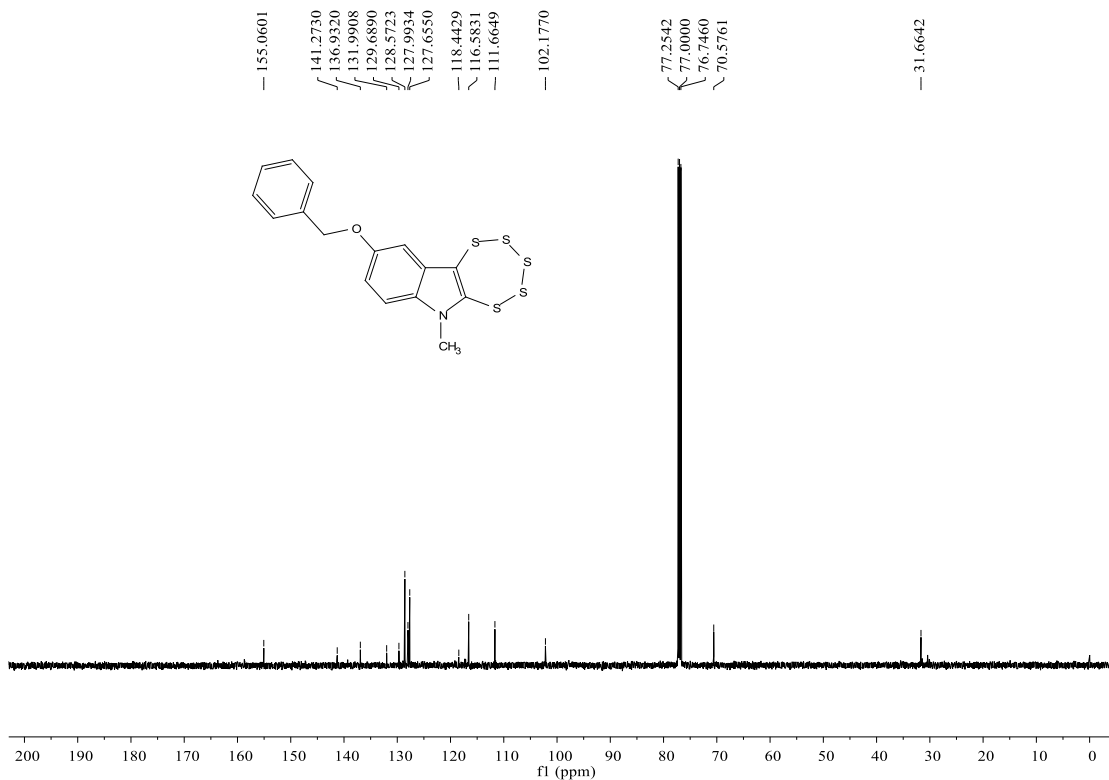

$^1\text{H}$ ,  $^{13}\text{C}$  and  $^{19}\text{F}$  NMR spectra of **30**

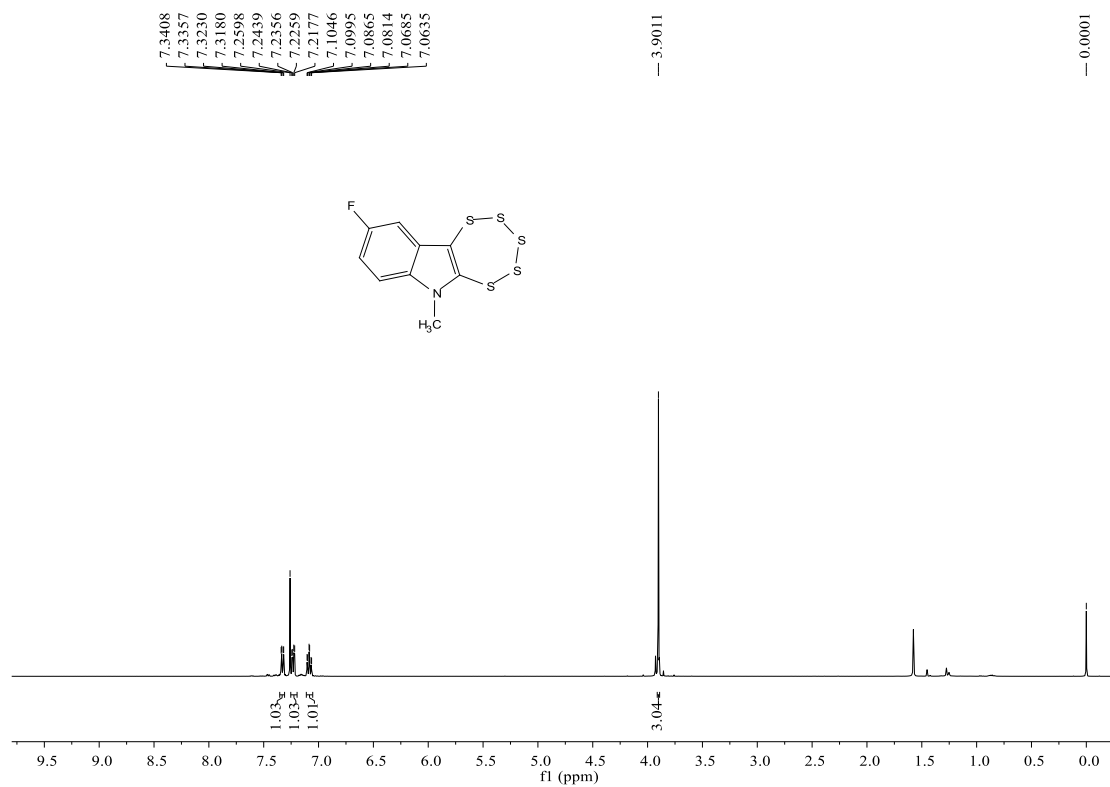

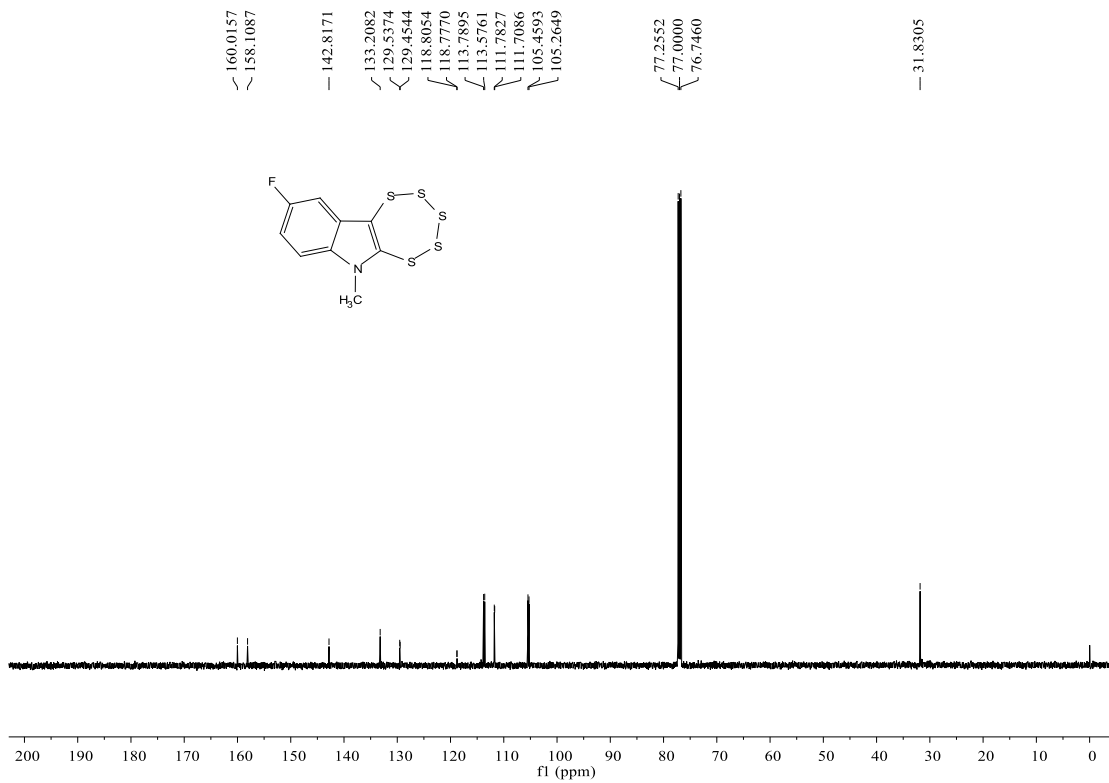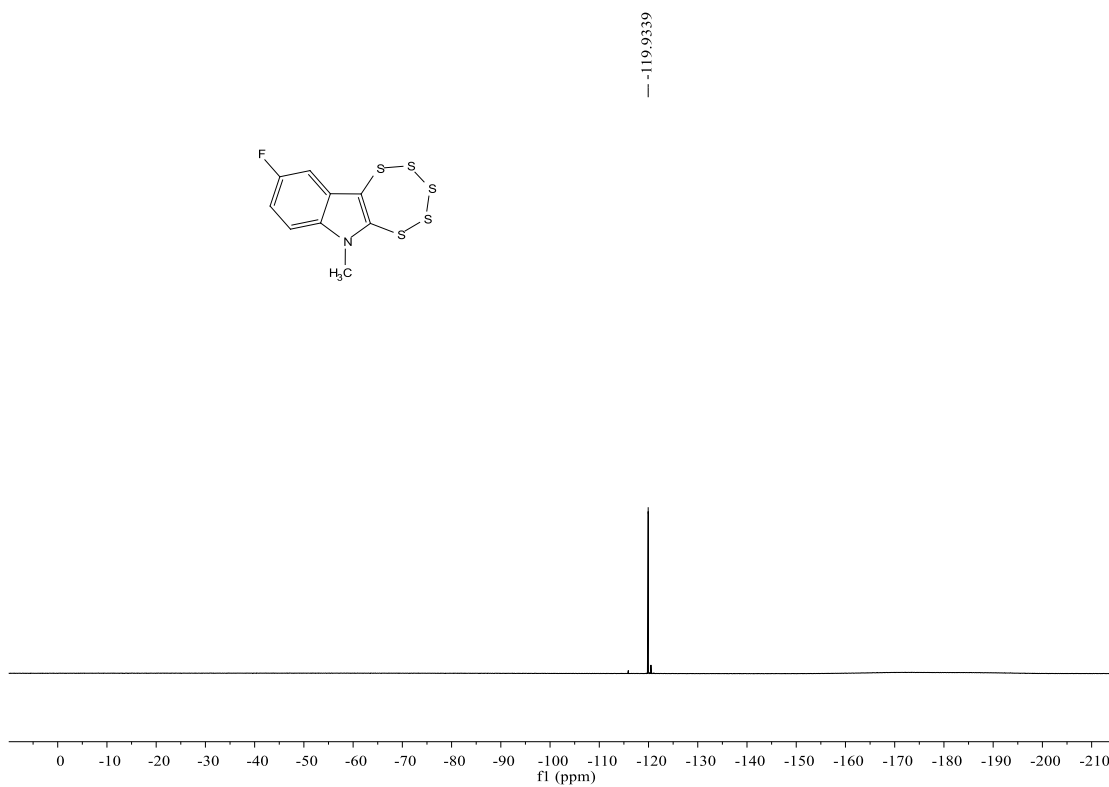

$^1\text{H}$  and  $^{13}\text{C}$  NMR spectra of **3q**

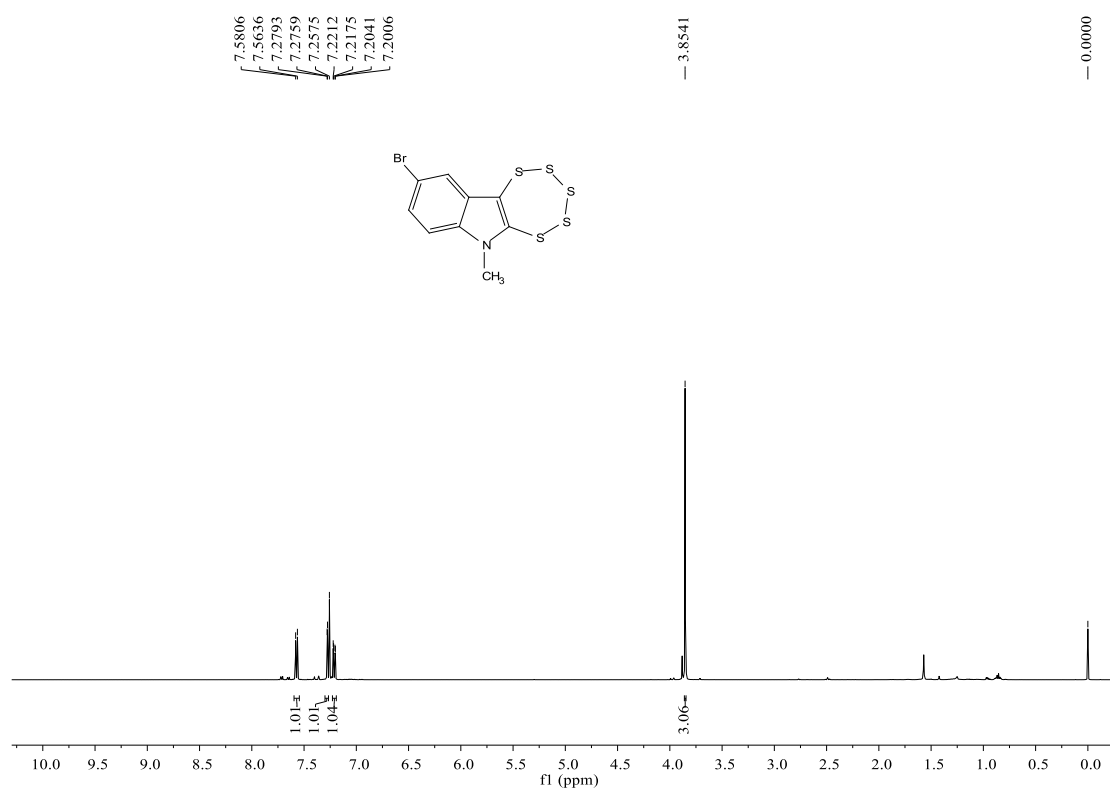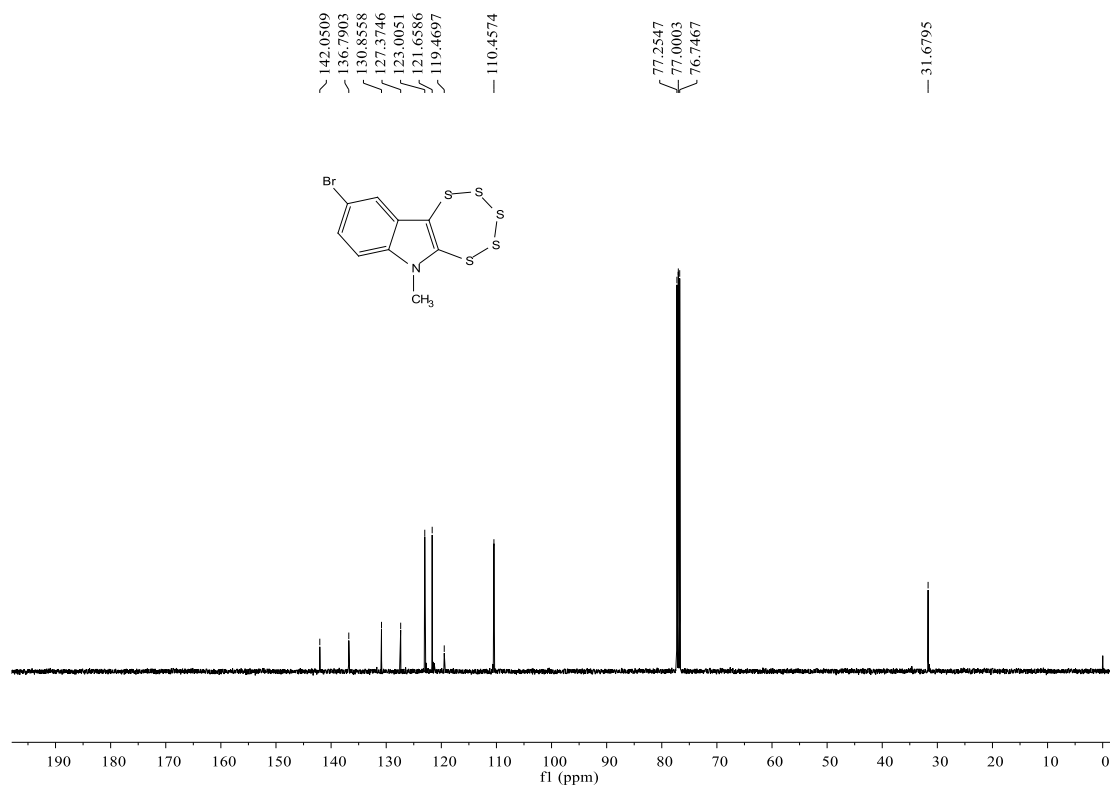



$^1\text{H}$  and  $^{13}\text{C}$  NMR spectra of **3r**

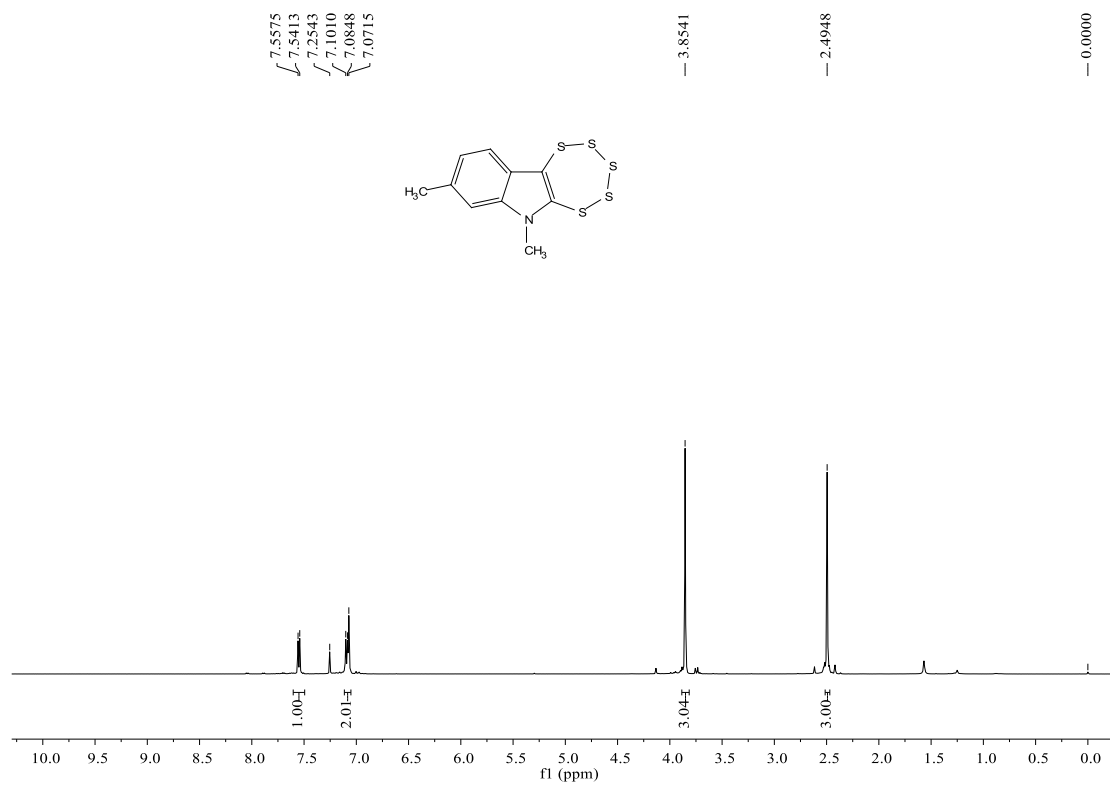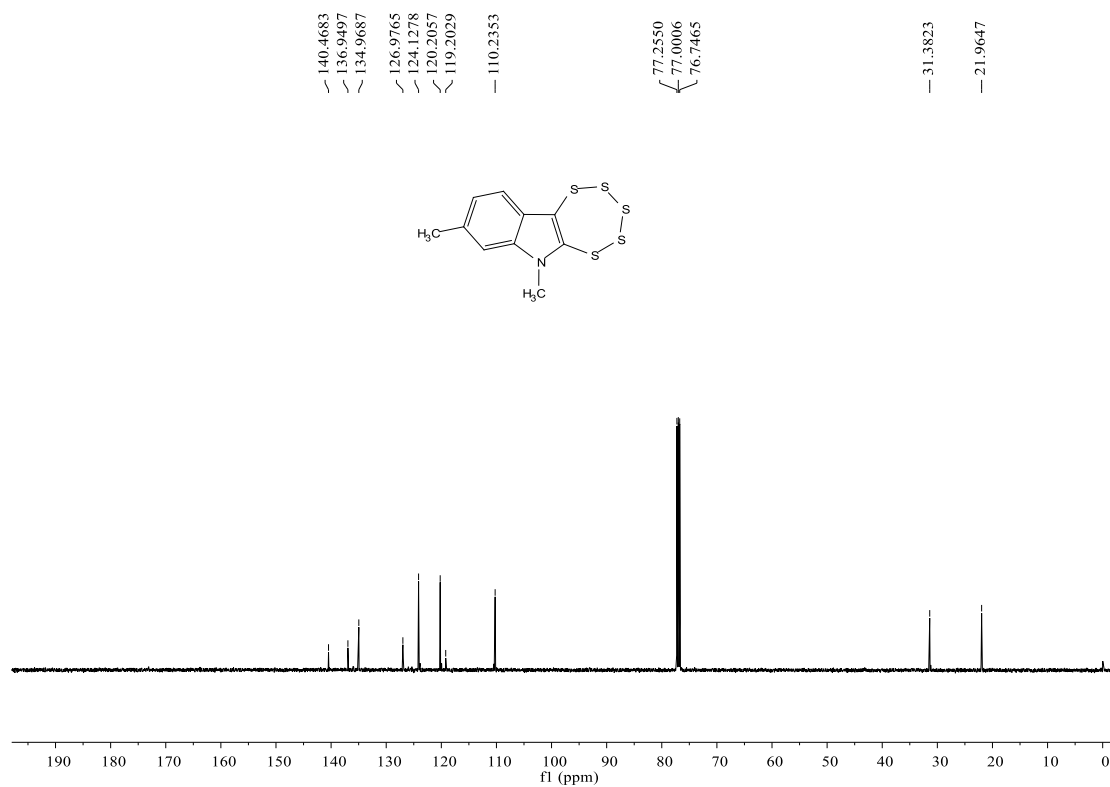

<sup>1</sup>H and <sup>13</sup>C NMR spectra of **3s**

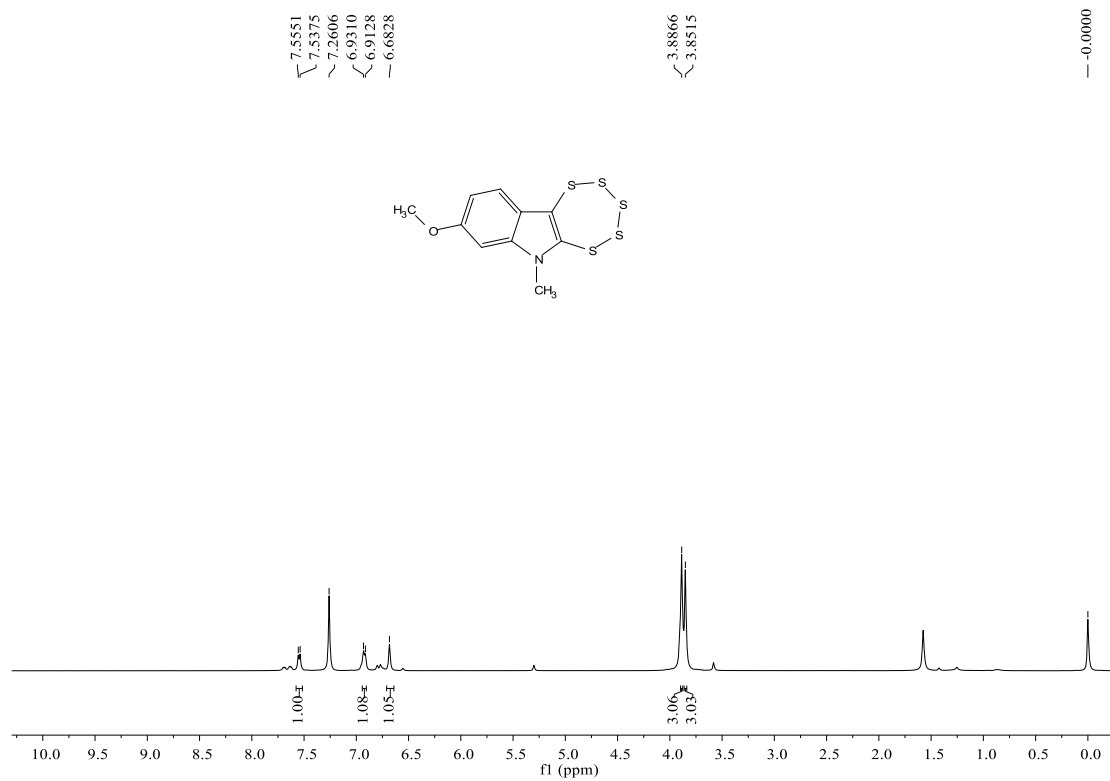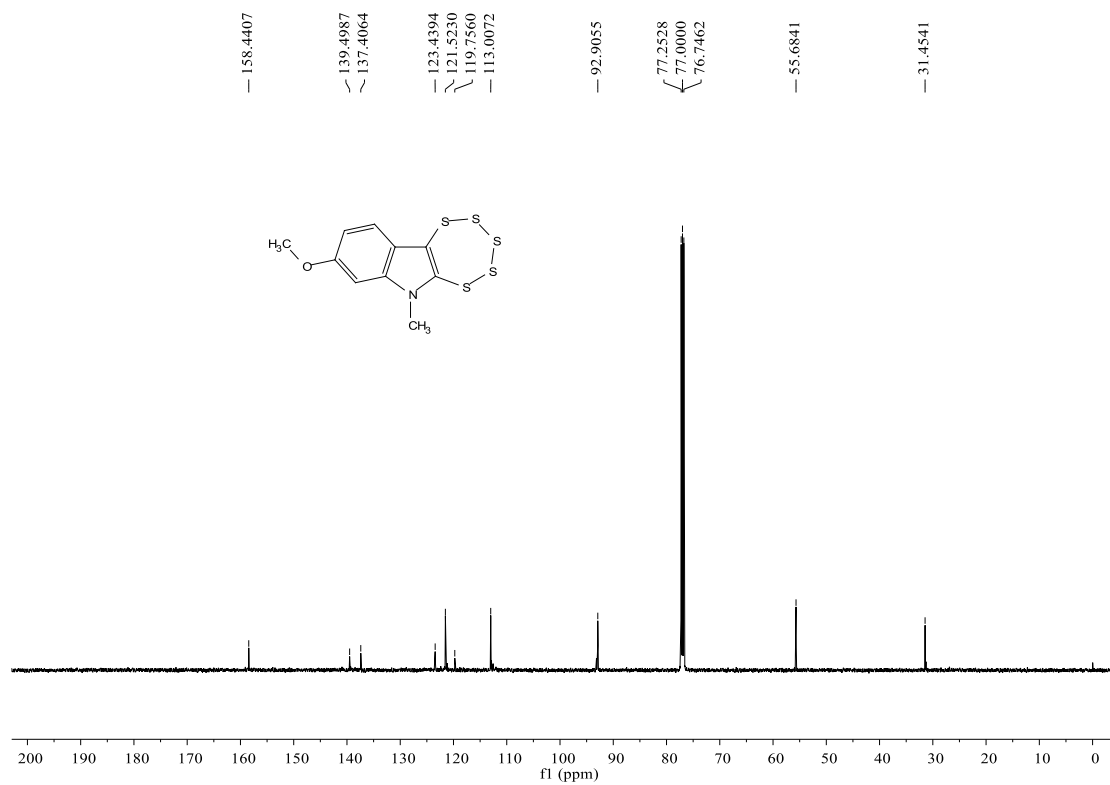

$^1\text{H}$ ,  $^{13}\text{C}$  and  $^{19}\text{F}$  NMR spectra of **3t**

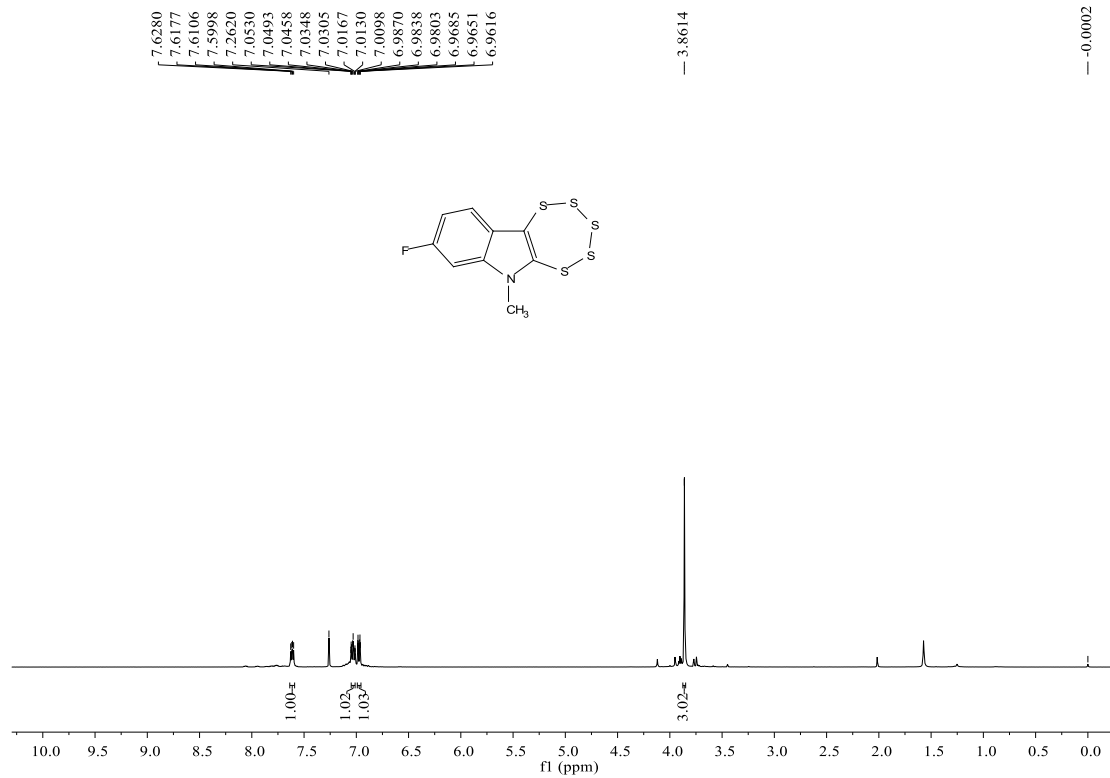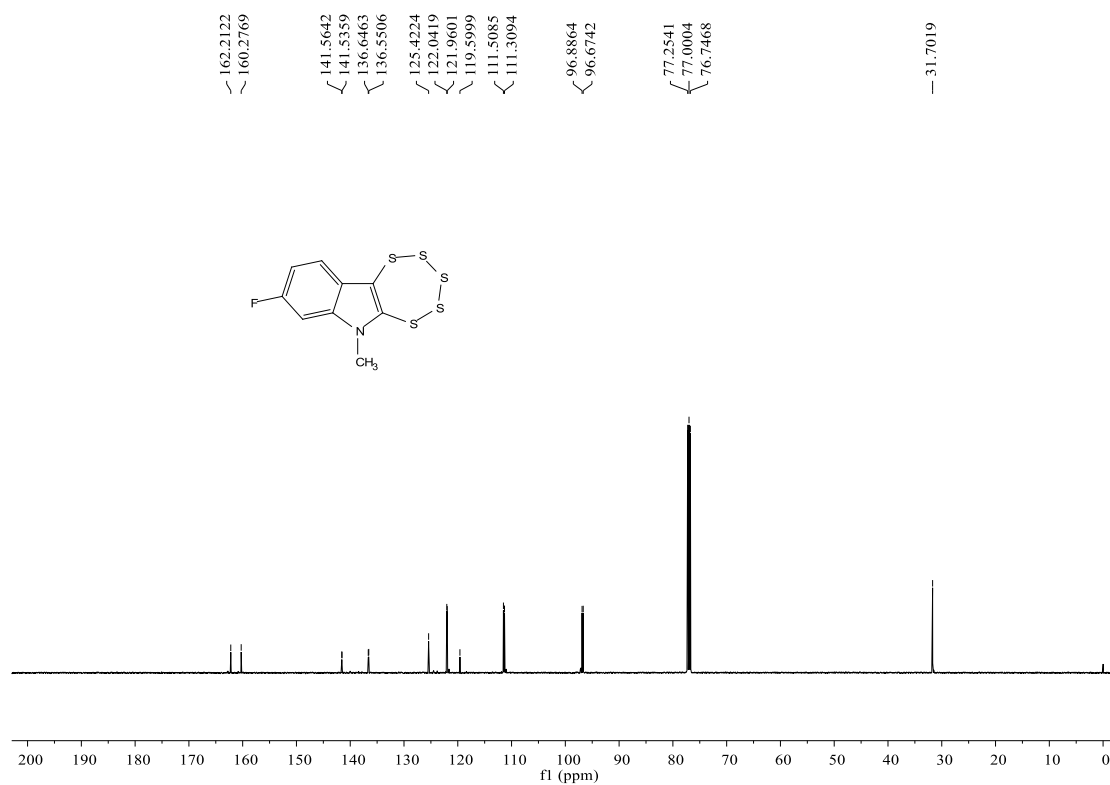

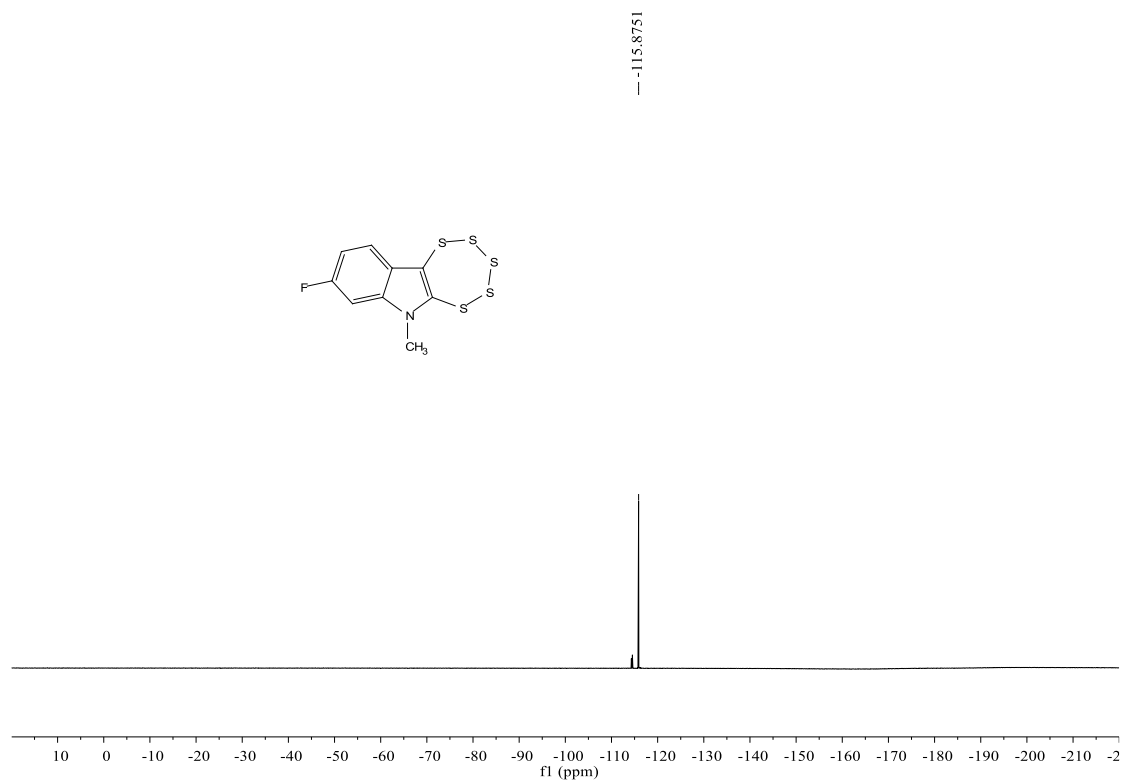

$^1\text{H}$  and  $^{13}\text{C}$  NMR spectra of **3v**

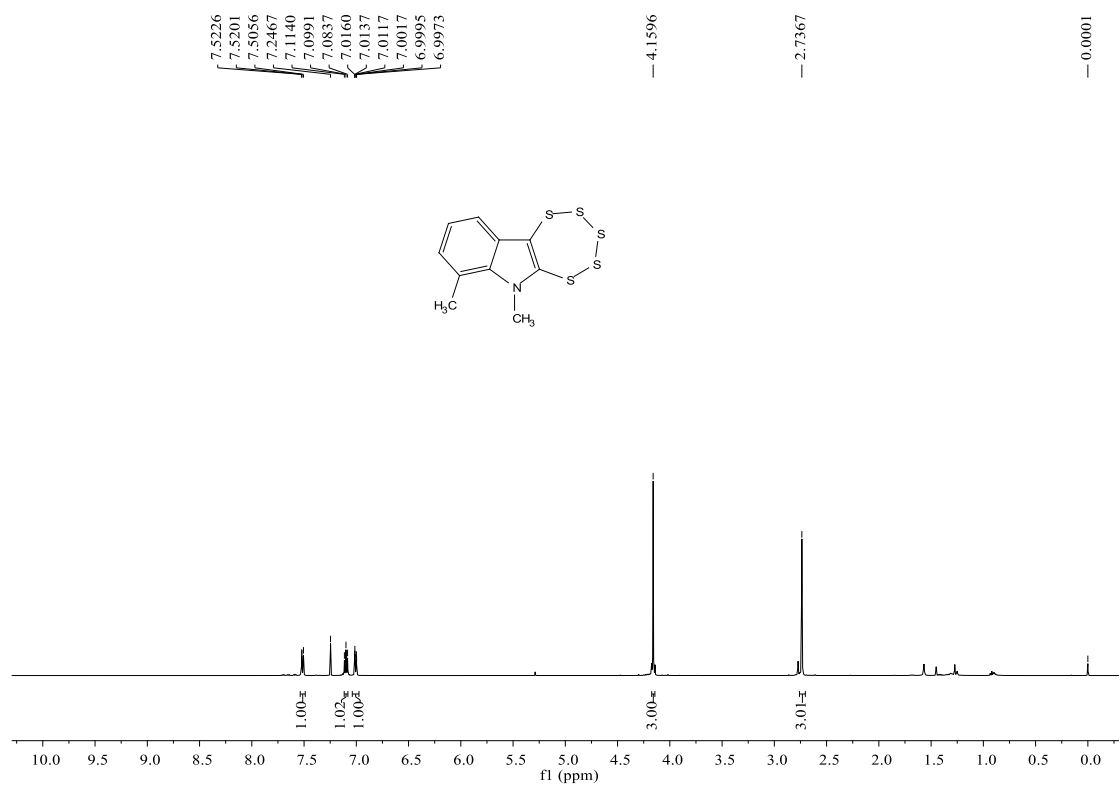

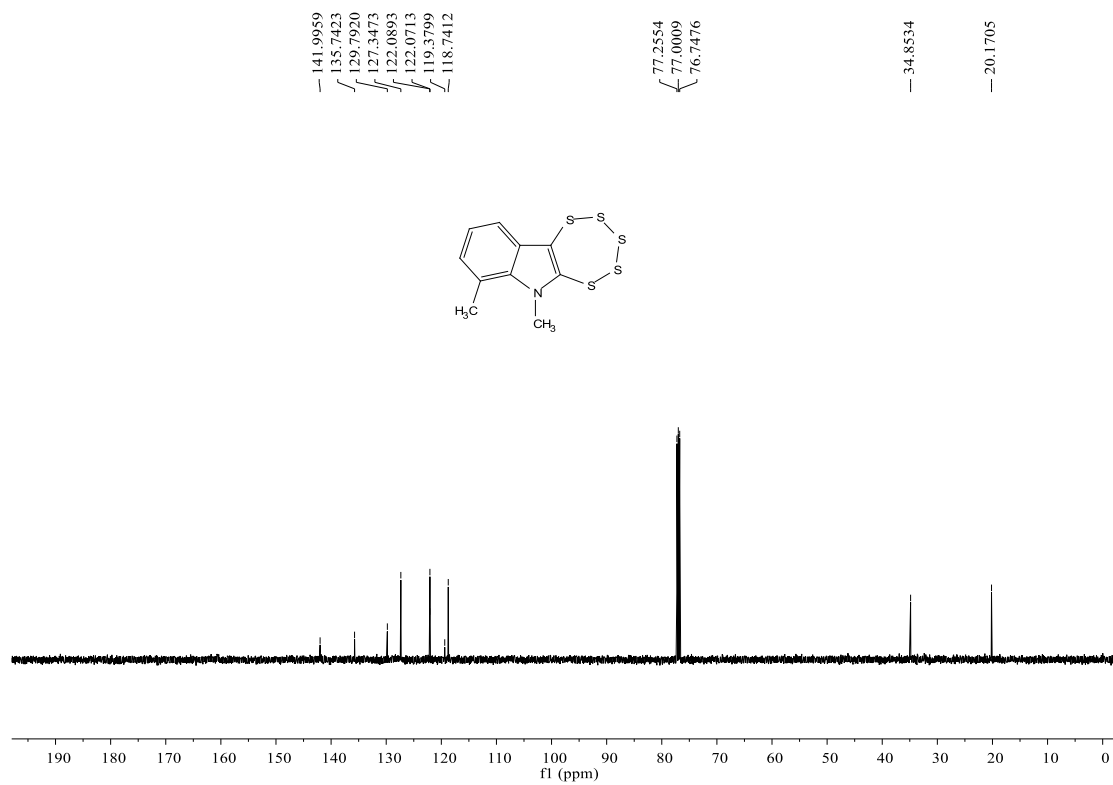

$^1\text{H}$  and  $^{13}\text{C}$  NMR spectra of **3w**

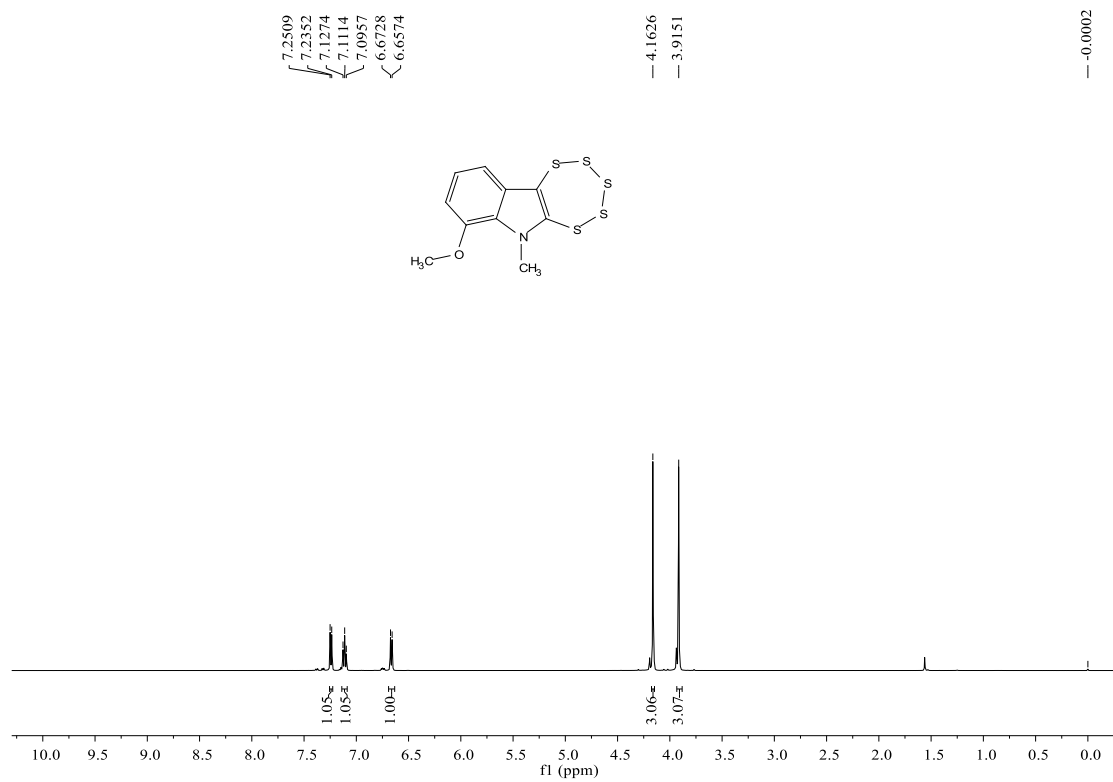

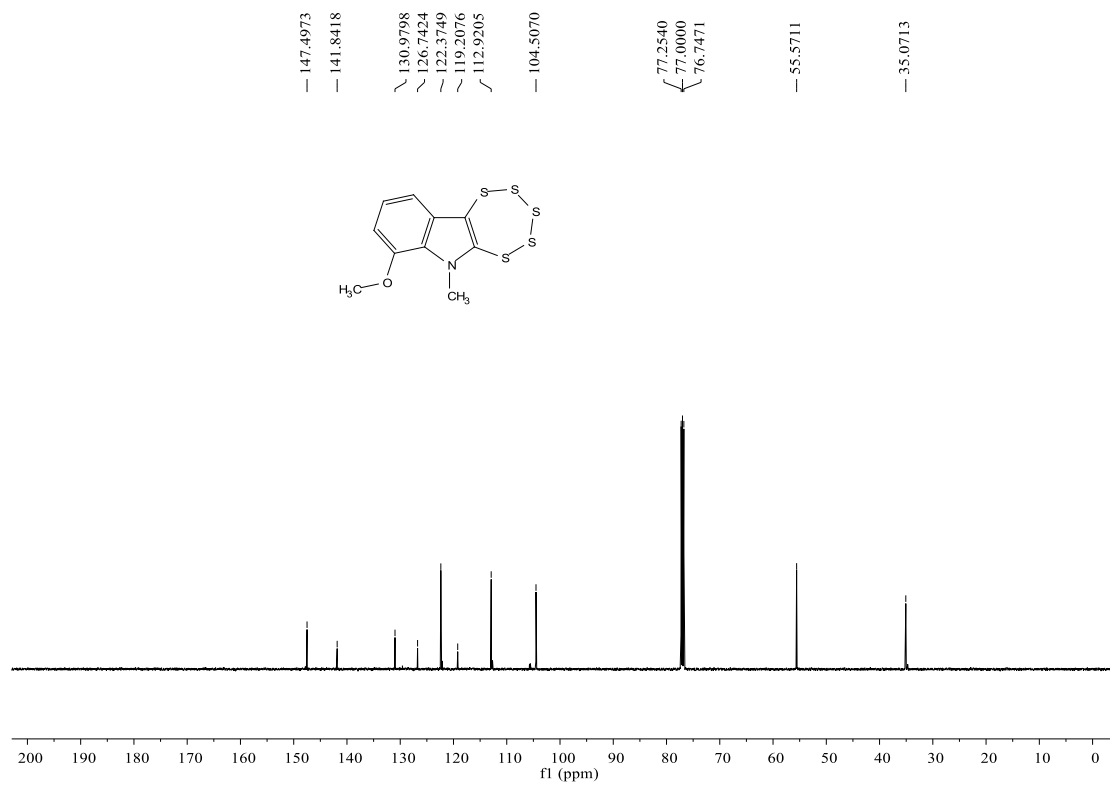

$^1\text{H}$  and  $^{13}\text{C}$  NMR spectra of **3y**

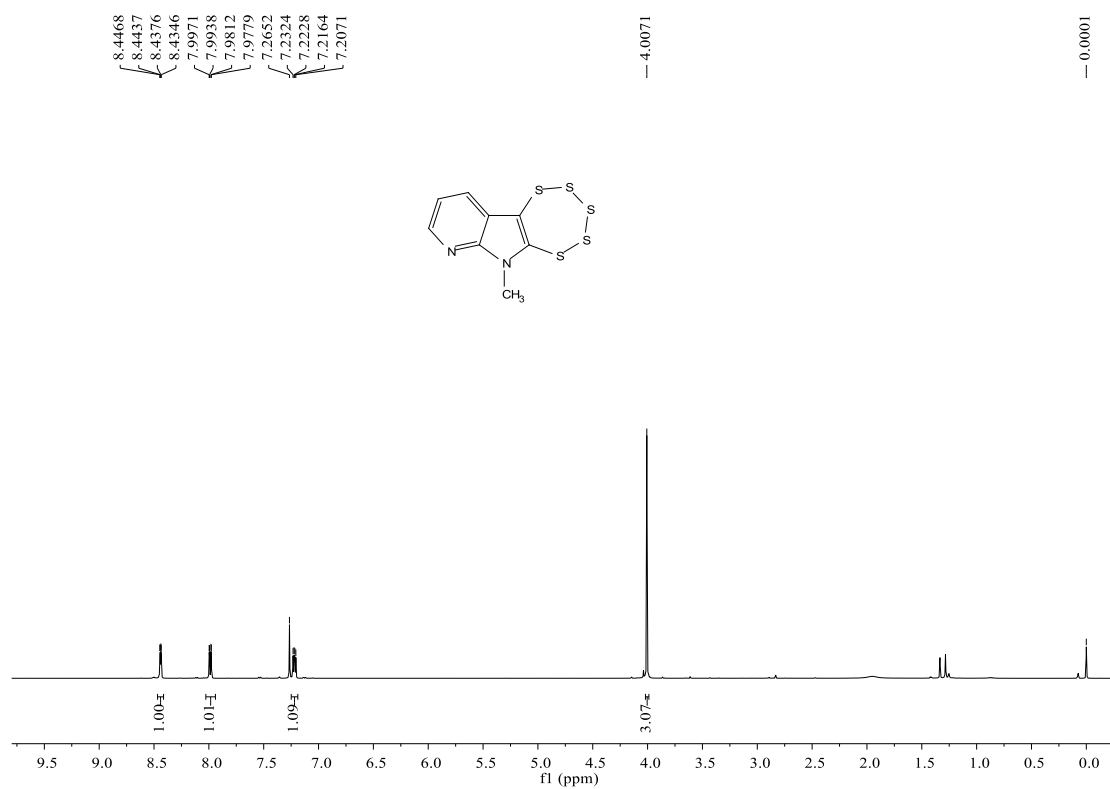

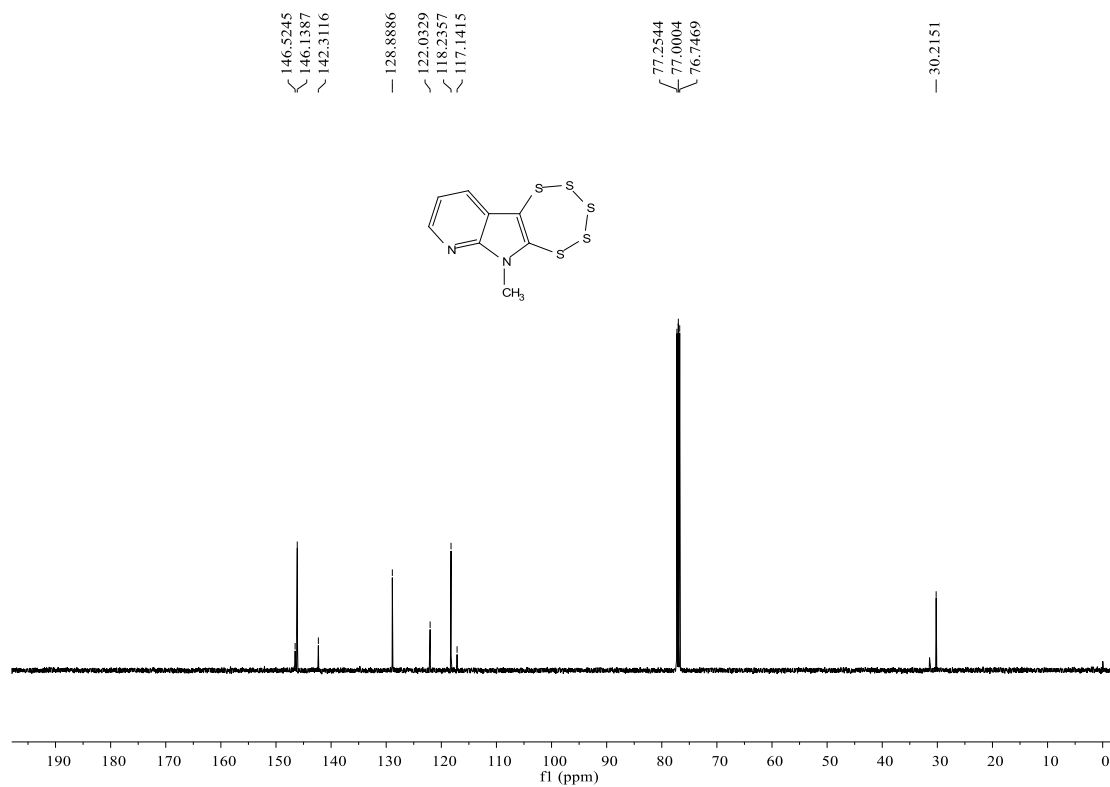

$^1\text{H}$  and  $^{13}\text{C}$  NMR spectra of **4a**

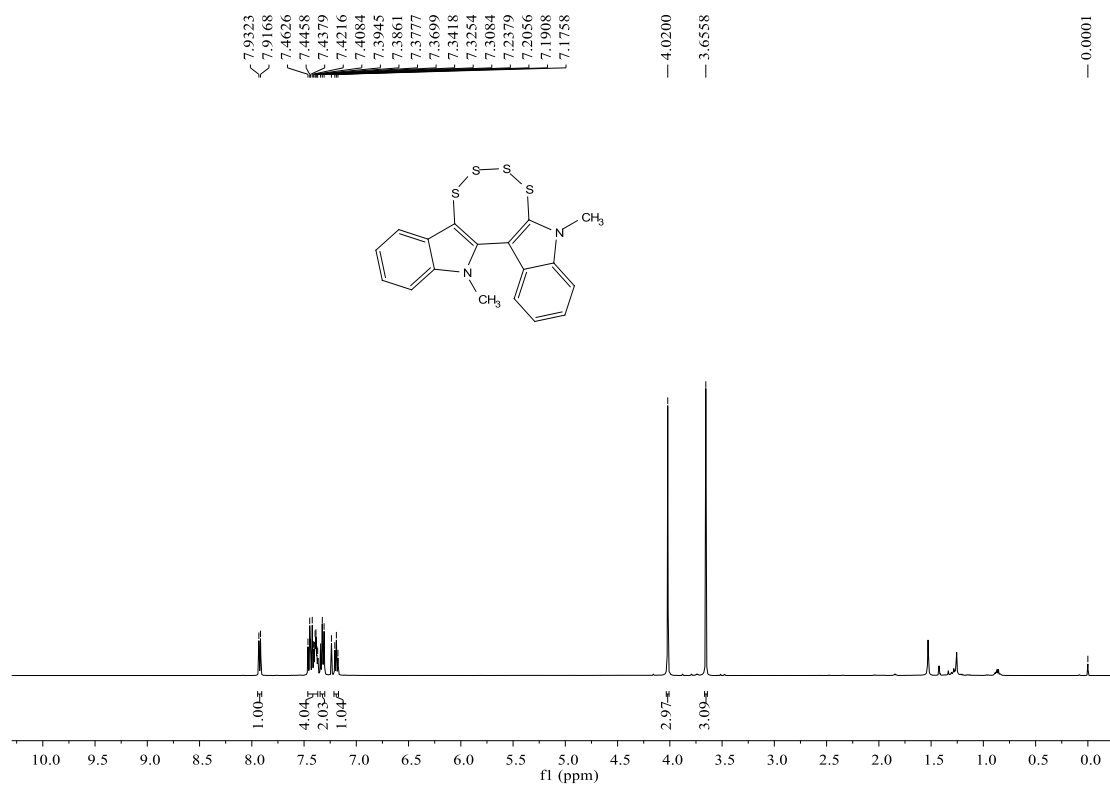

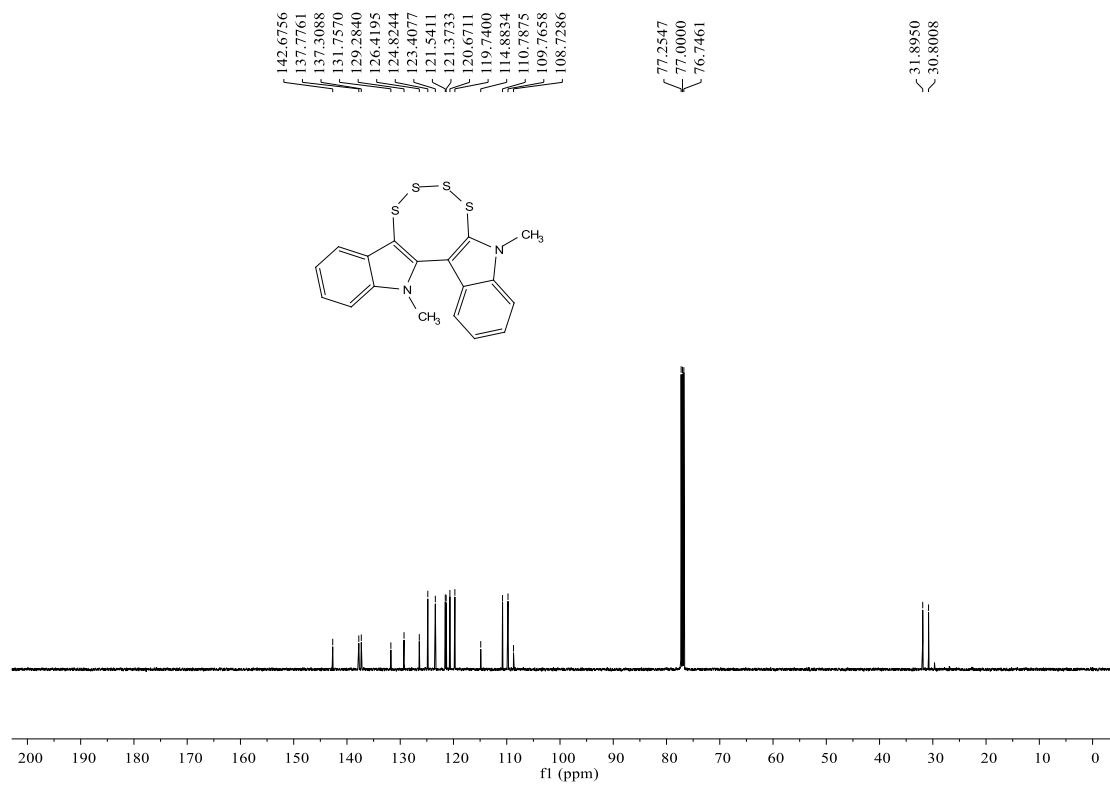

$^1\text{H}$  and  $^{13}\text{C}$  NMR spectra of **4c**

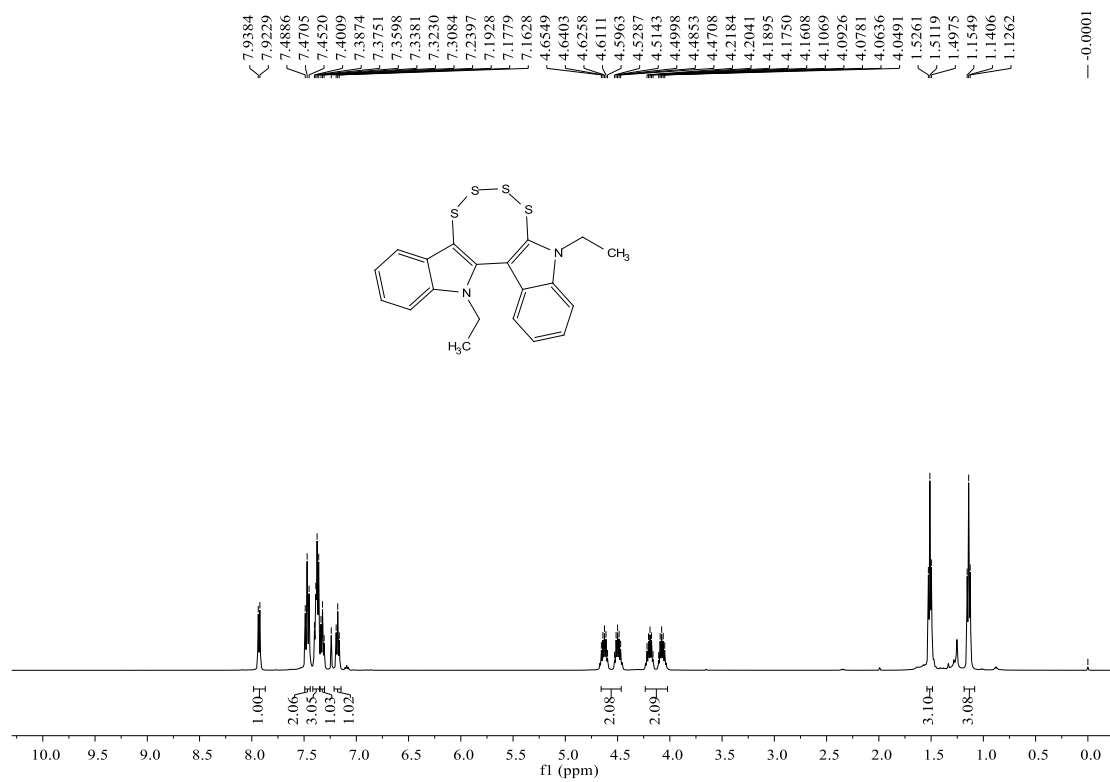



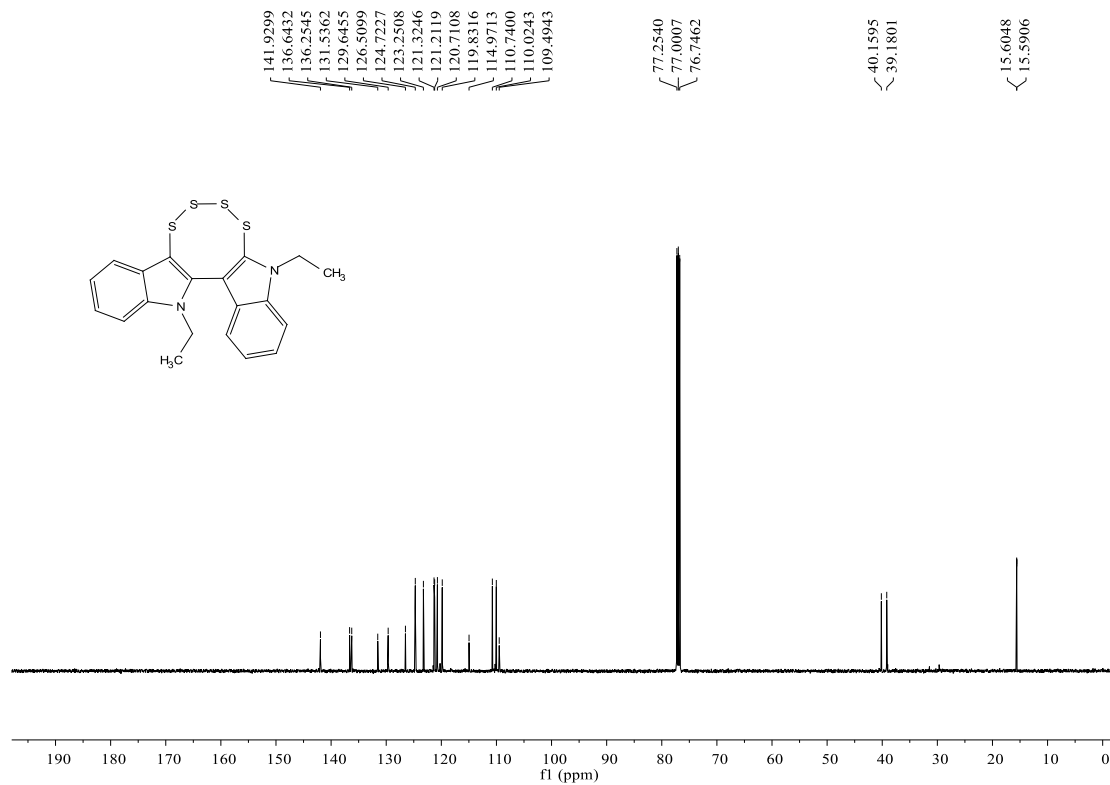

<sup>1</sup>H and <sup>13</sup>C NMR spectra of **4d**

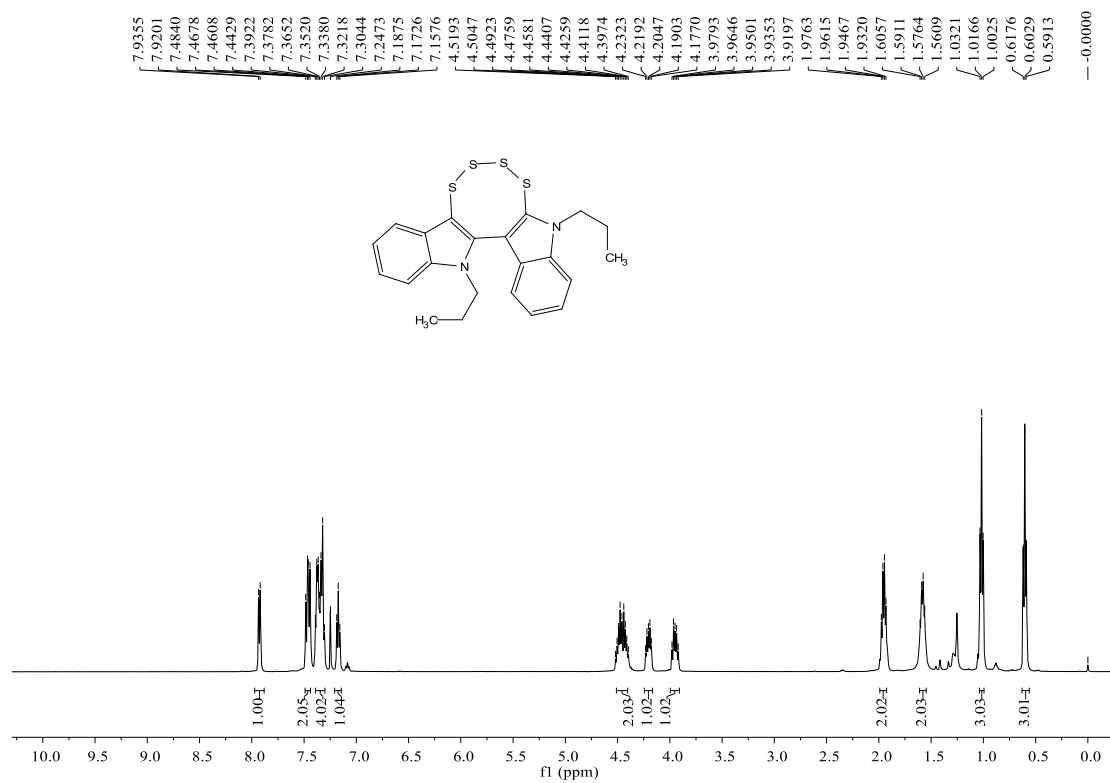

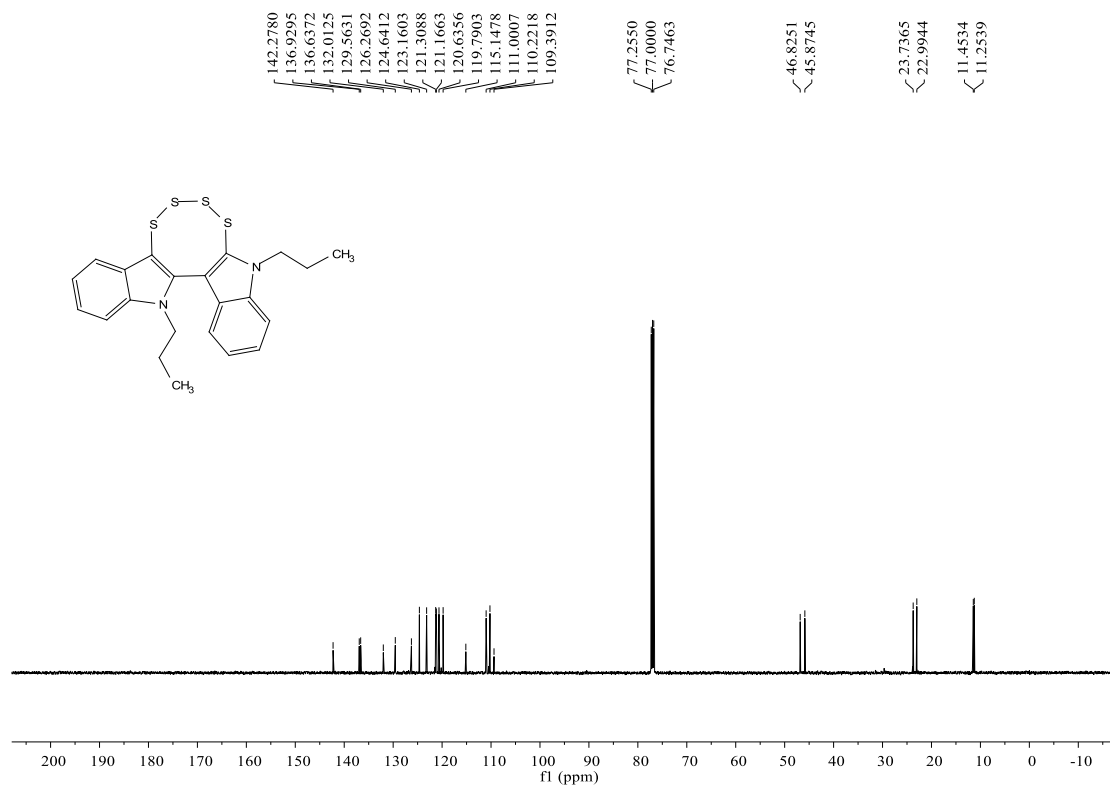

$^1\text{H}$  and  $^{13}\text{C}$  NMR spectra of **4I**

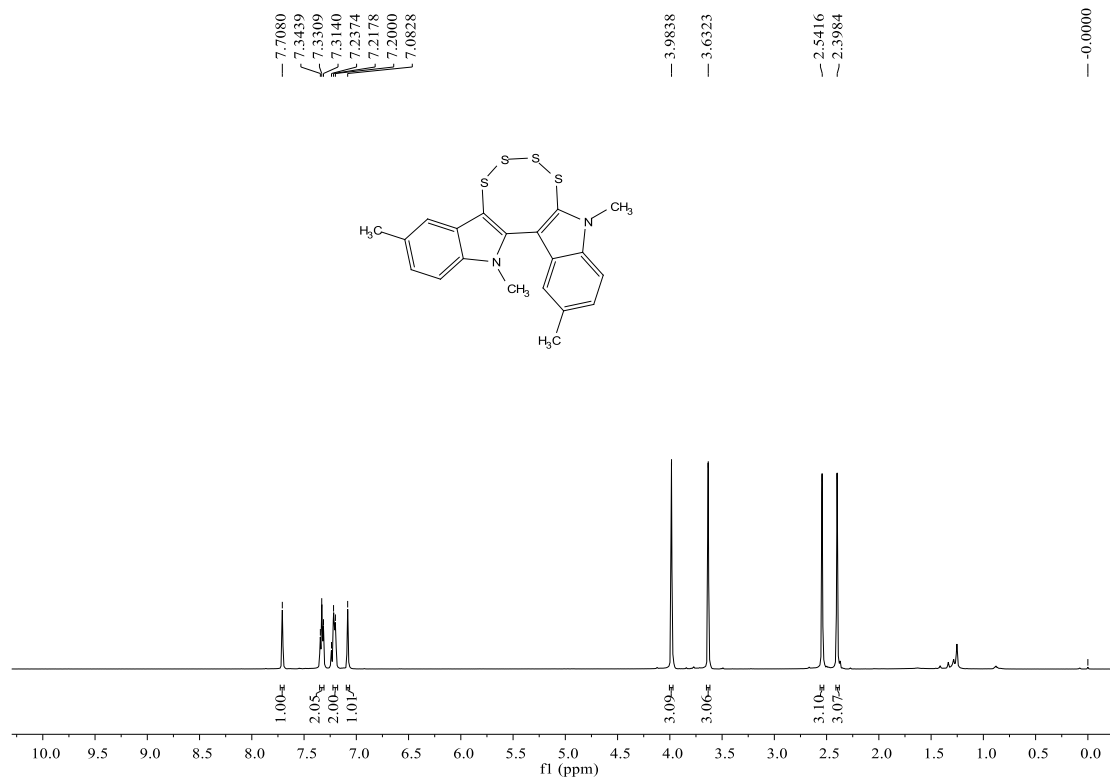

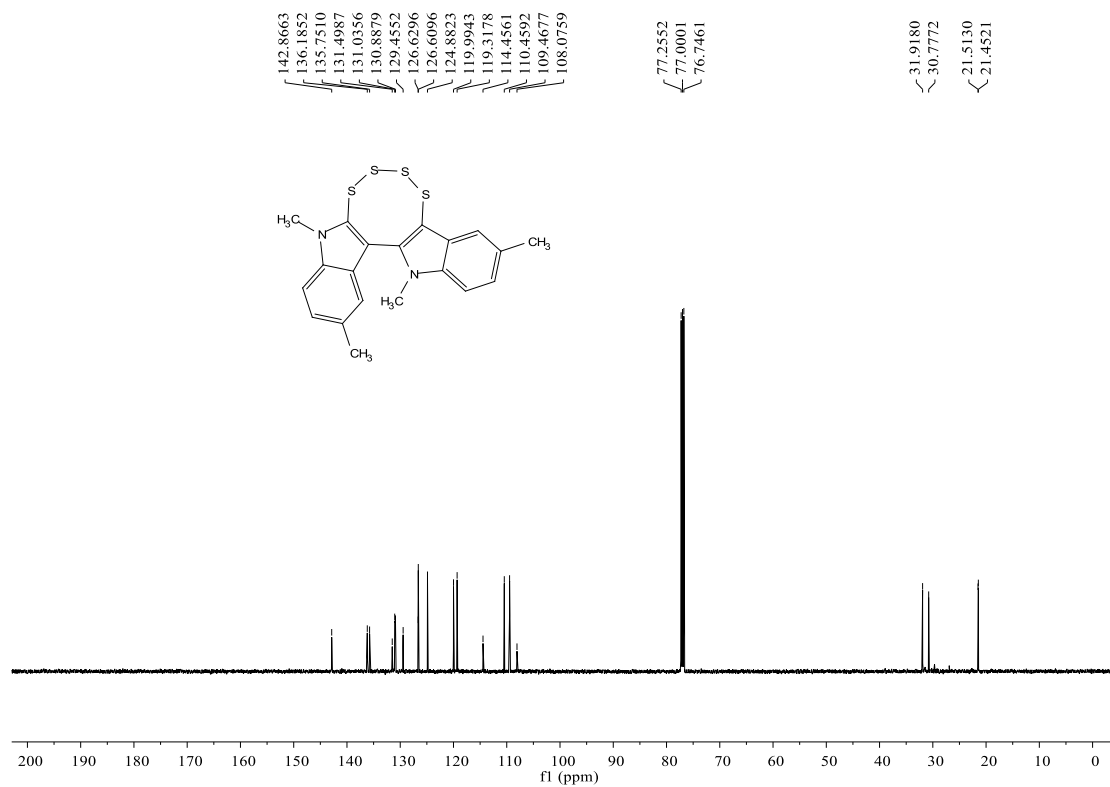

<sup>1</sup>H and <sup>13</sup>C NMR spectra of **4m**

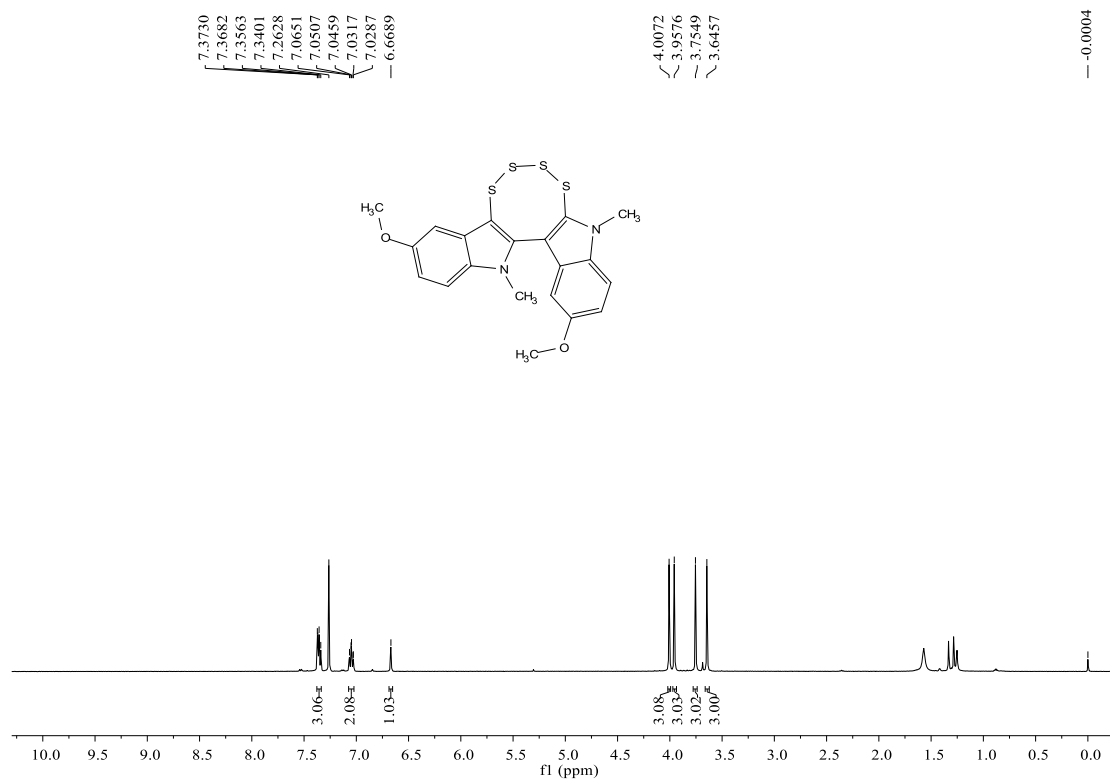

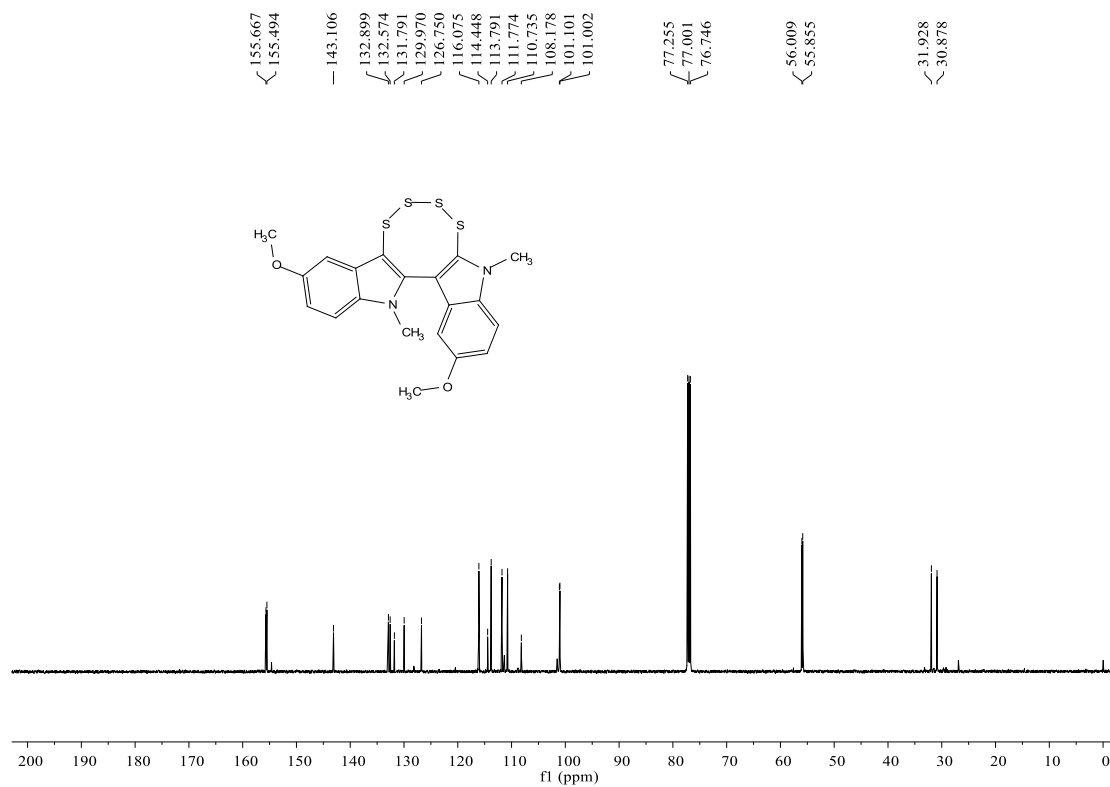

<sup>1</sup>H and <sup>13</sup>C NMR spectra of **4n**

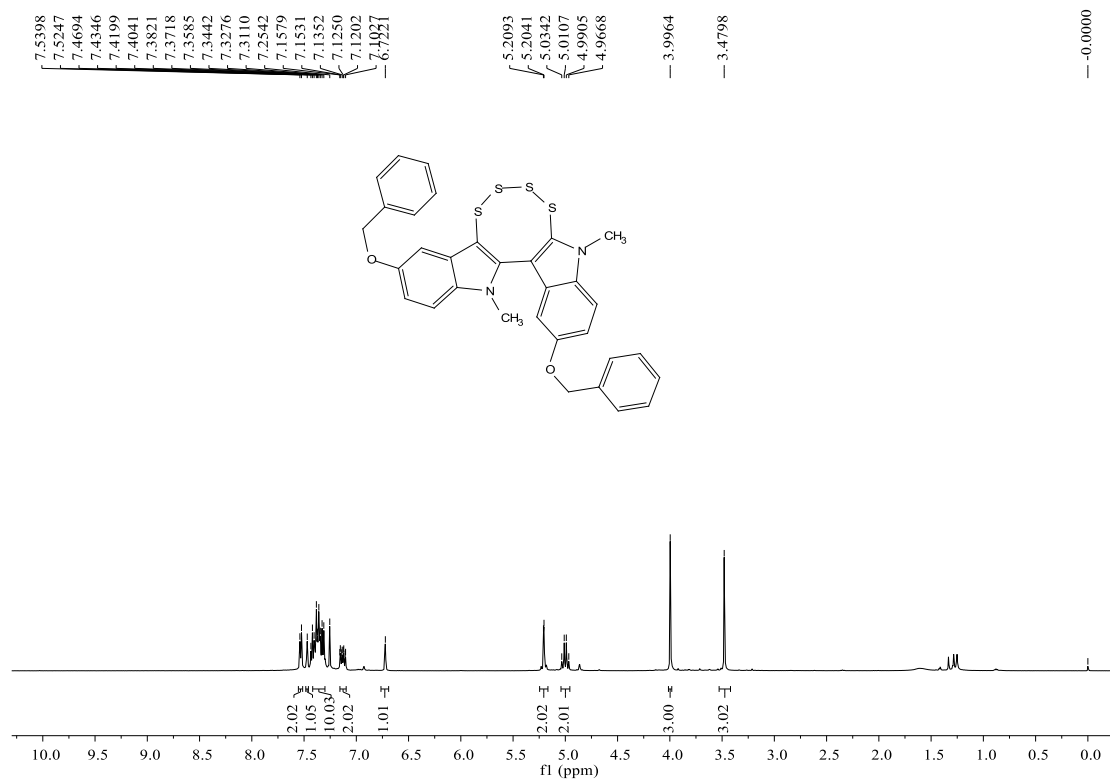

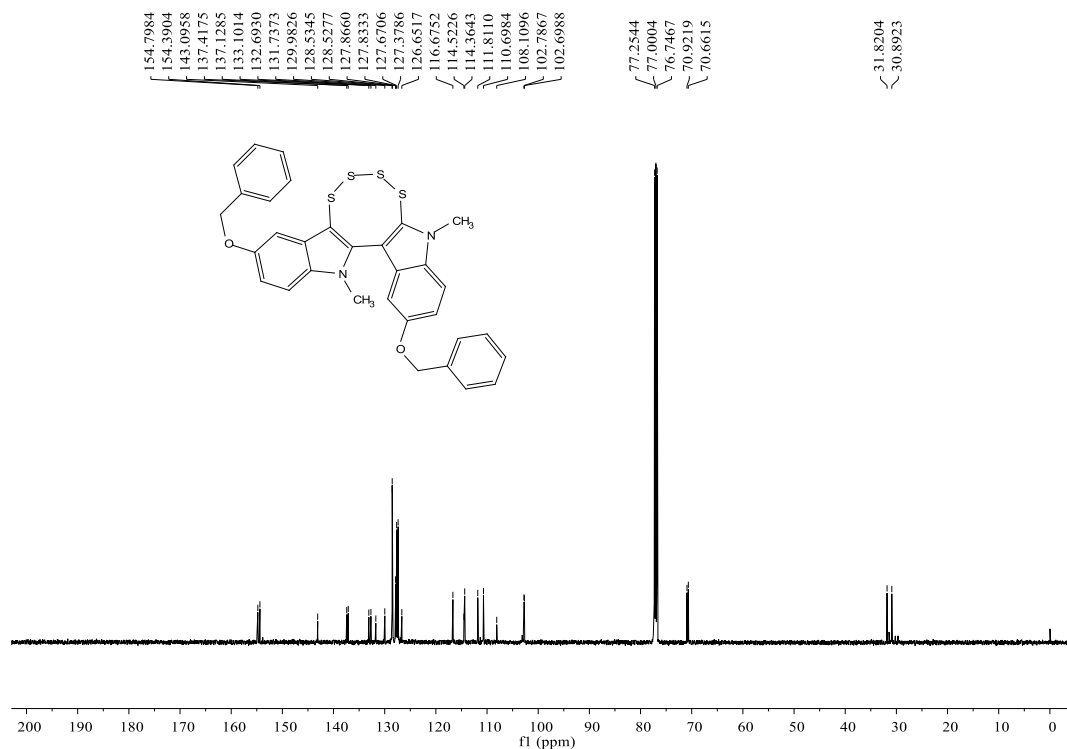

<sup>1</sup>H and <sup>13</sup>C NMR spectra of **4r**

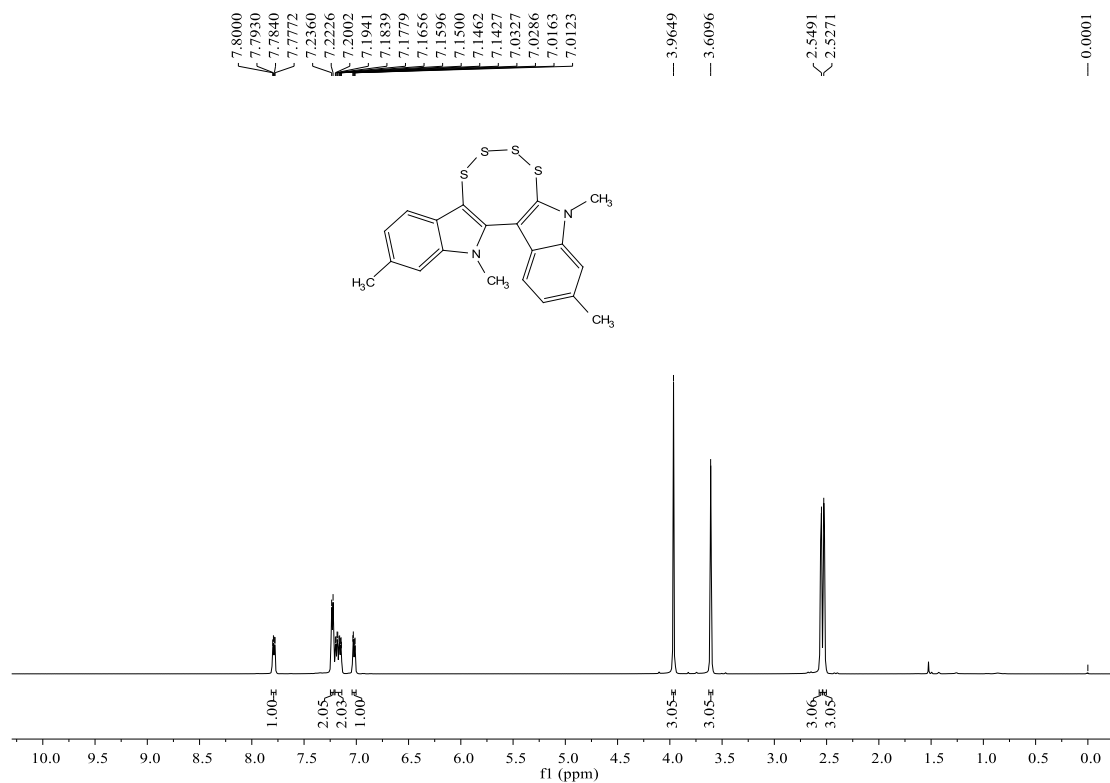

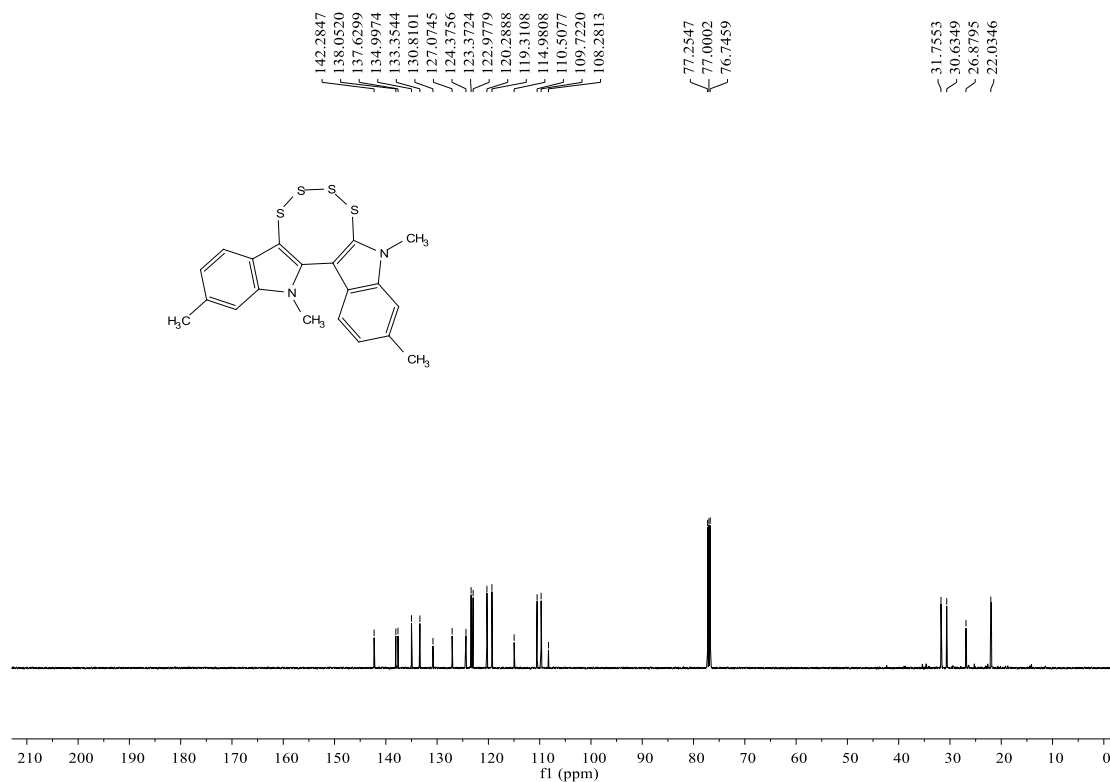

<sup>1</sup>H and <sup>13</sup>C NMR spectra of **4s**

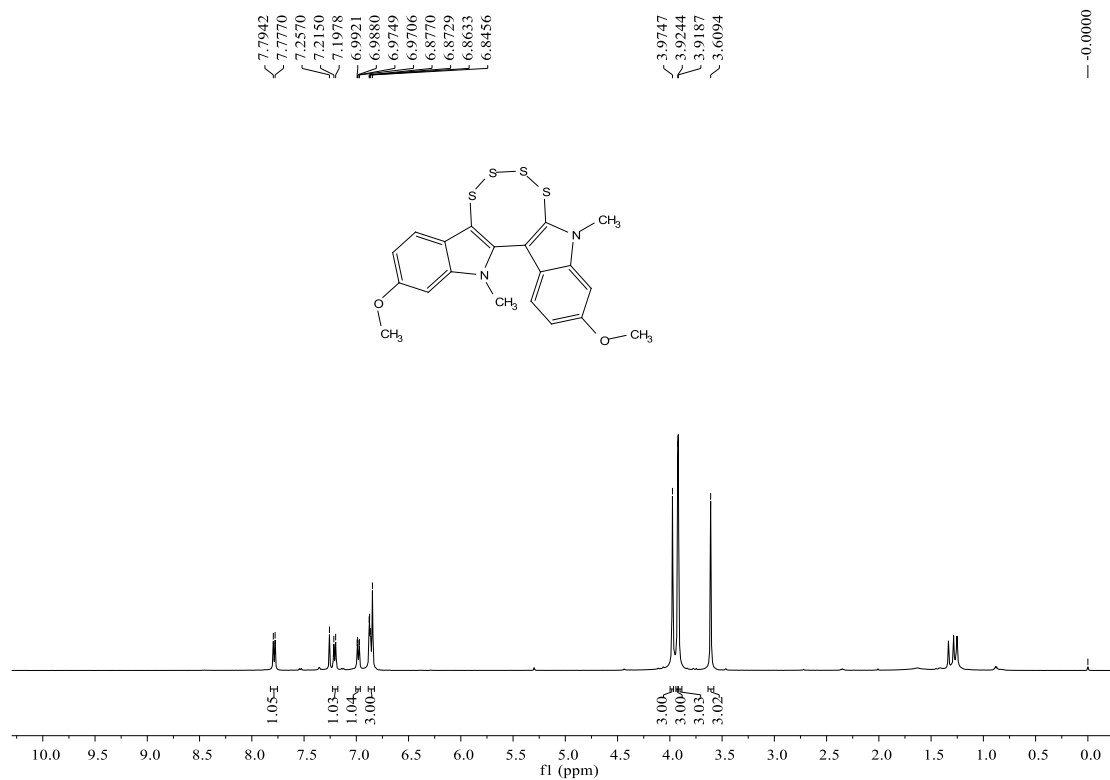

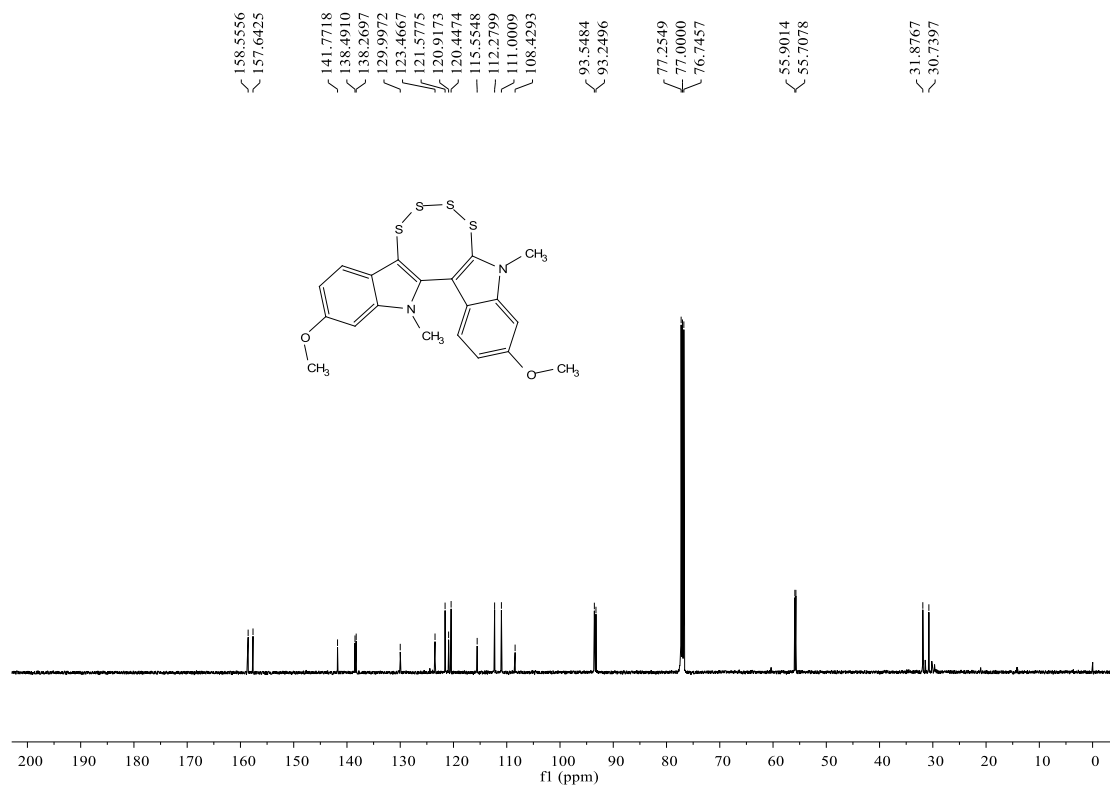

<sup>1</sup>H and <sup>13</sup>C NMR spectra of **4v**

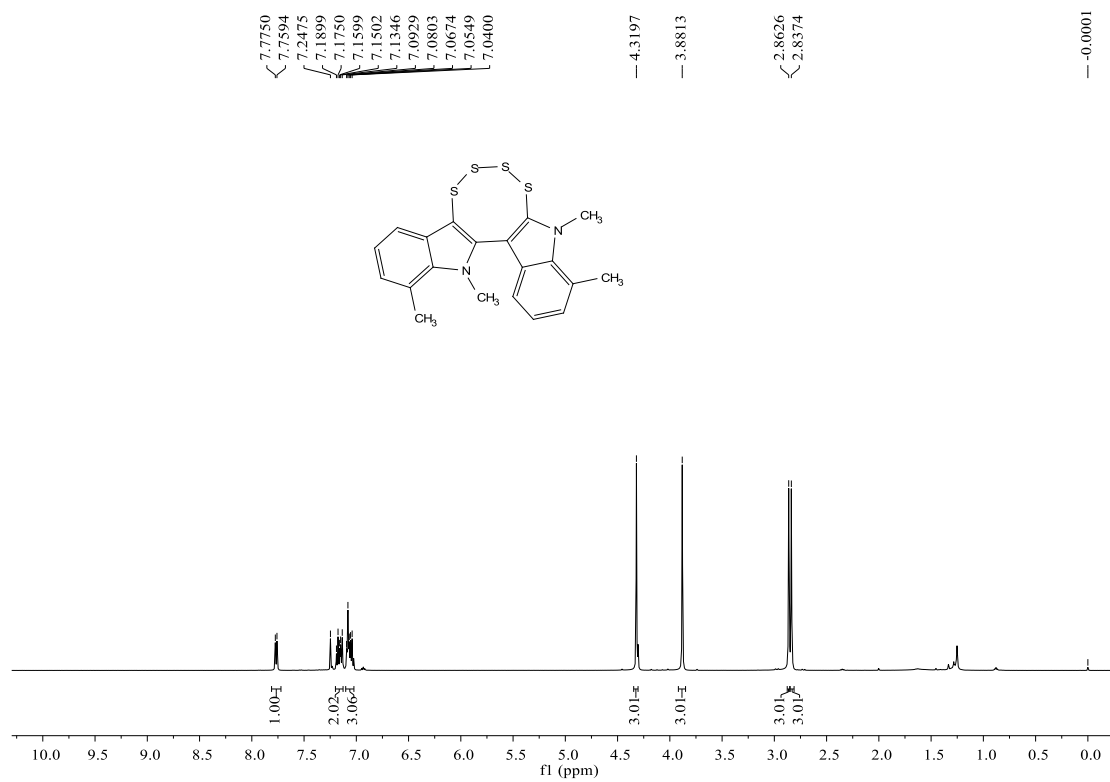

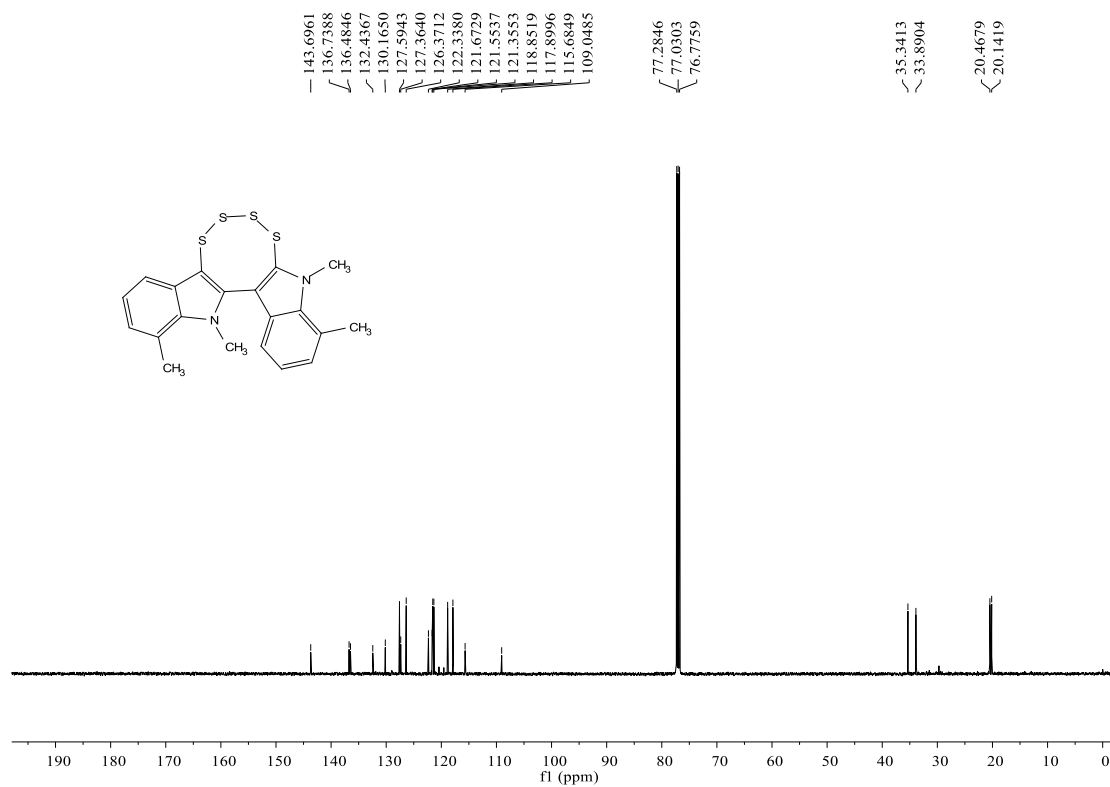

<sup>1</sup>H and <sup>13</sup>C NMR spectra of **5**

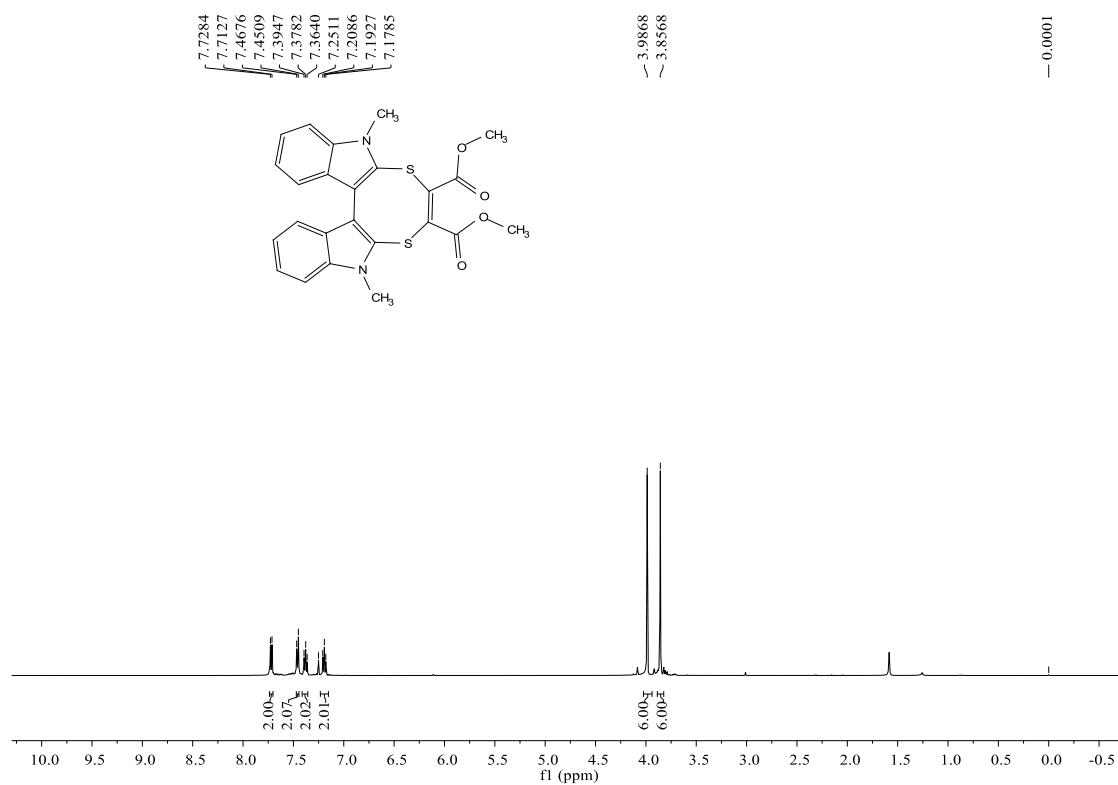



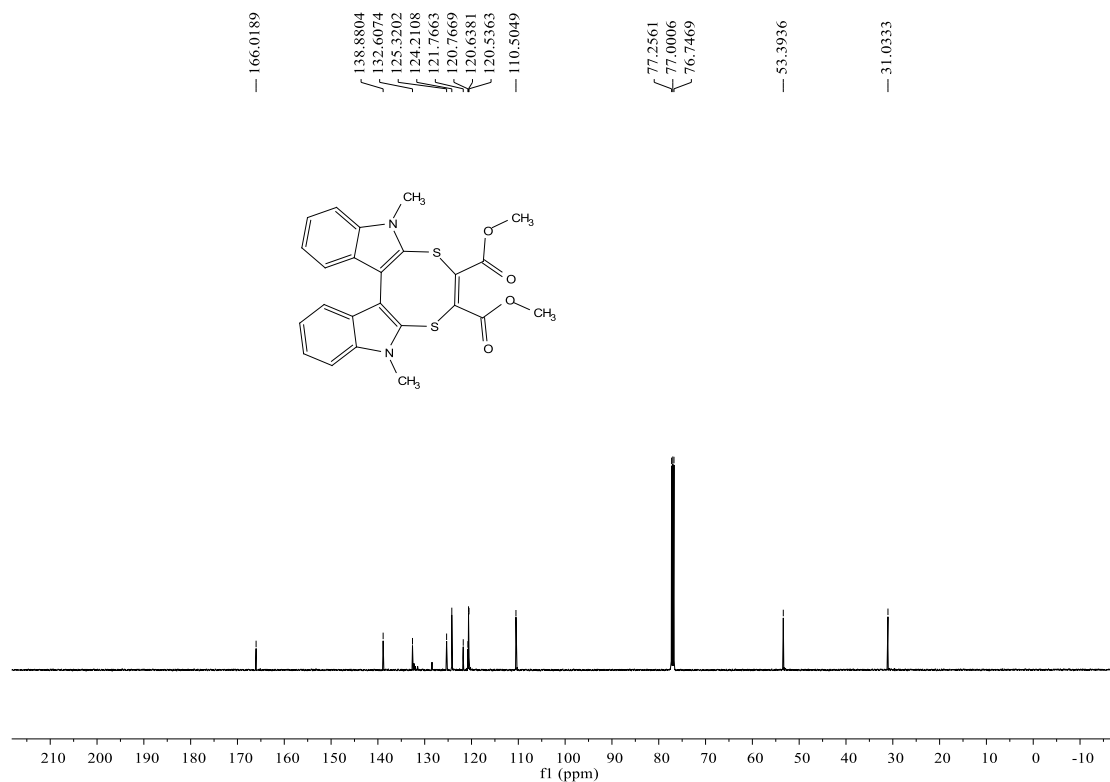

<sup>1</sup>H and <sup>13</sup>C NMR spectra of **6**

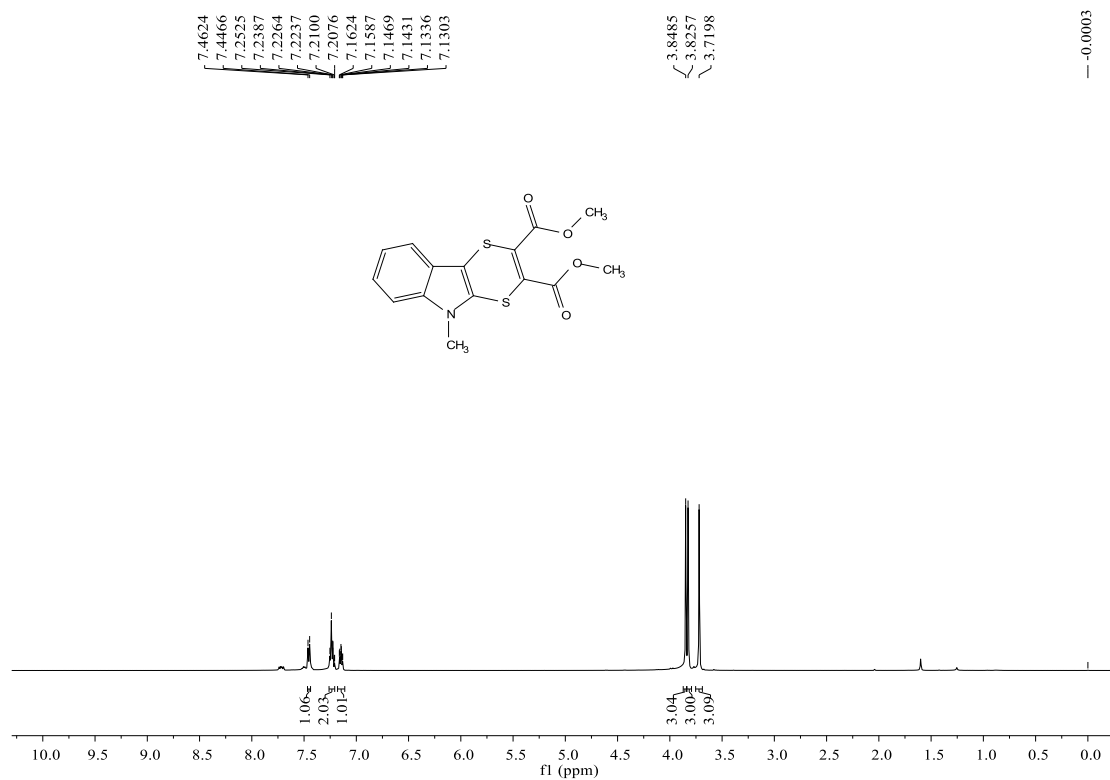

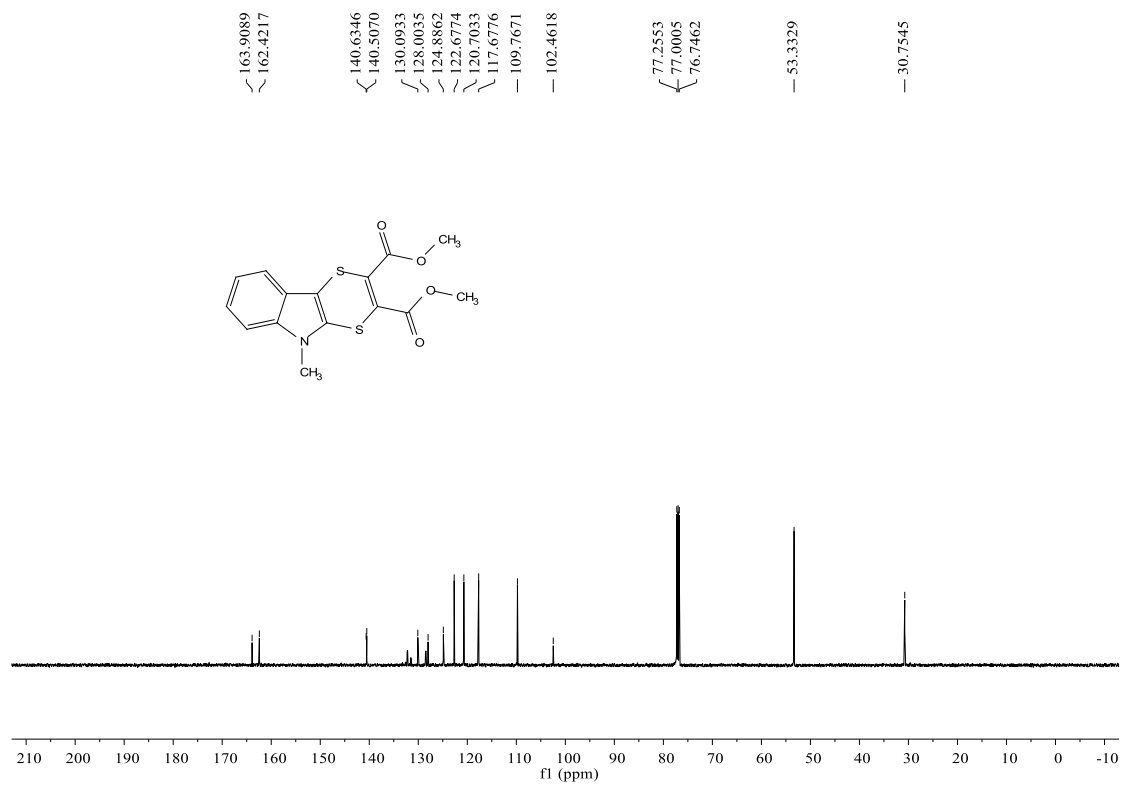

<sup>1</sup>H and <sup>13</sup>C NMR spectra of 7

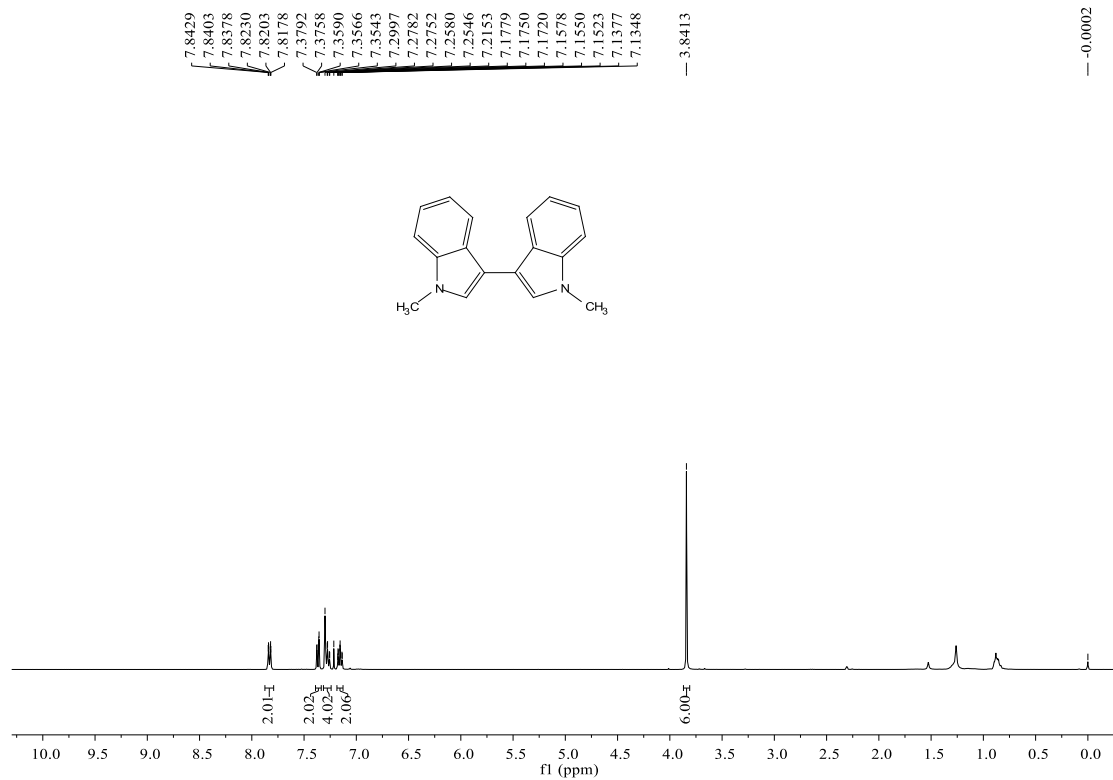

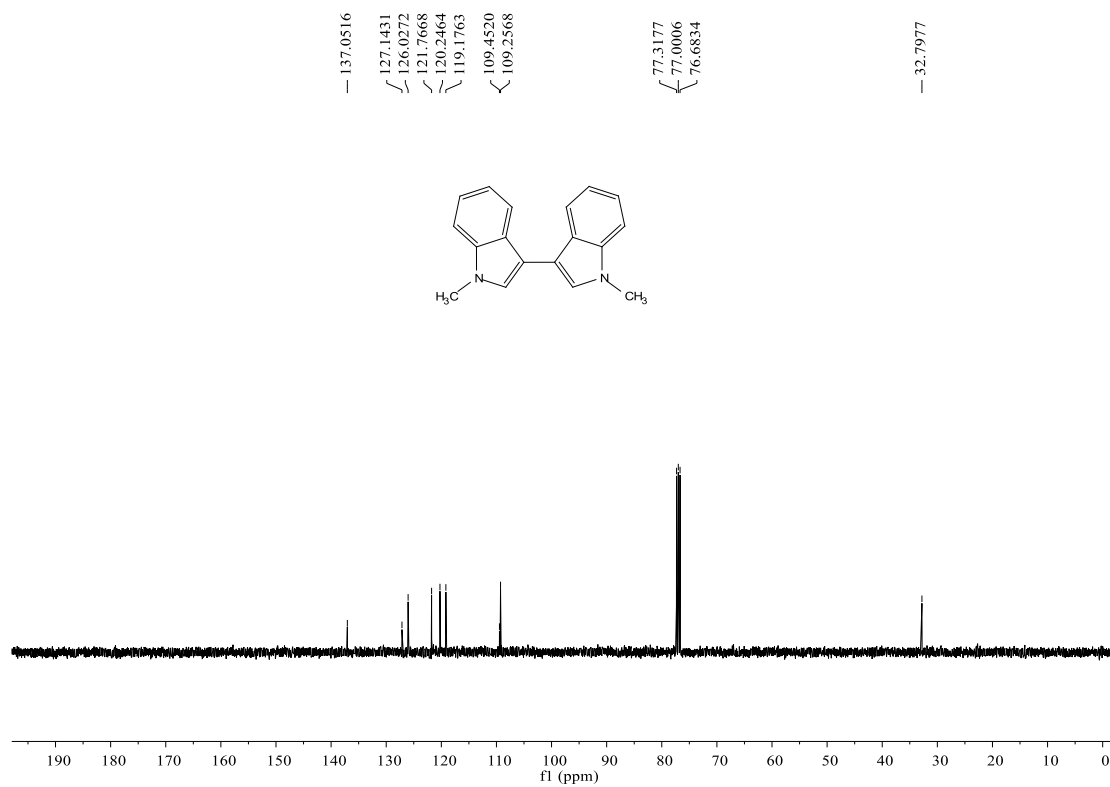

<sup>1</sup>H and <sup>13</sup>C NMR spectra of 8

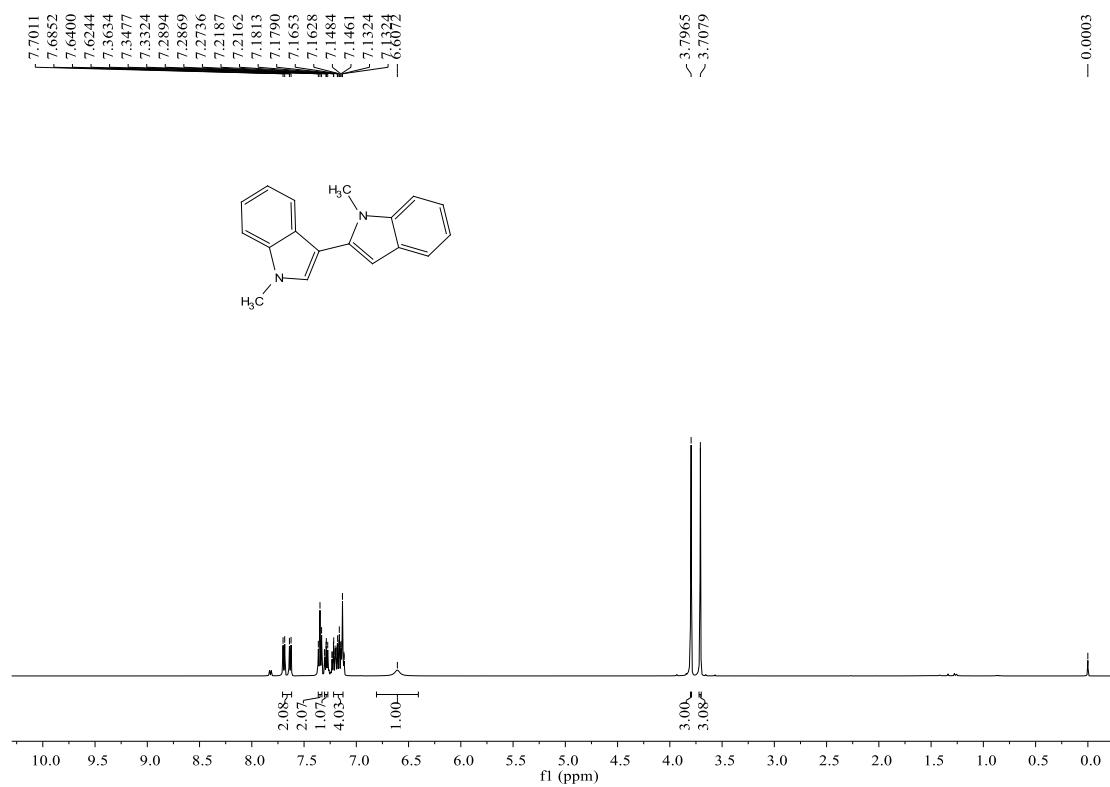

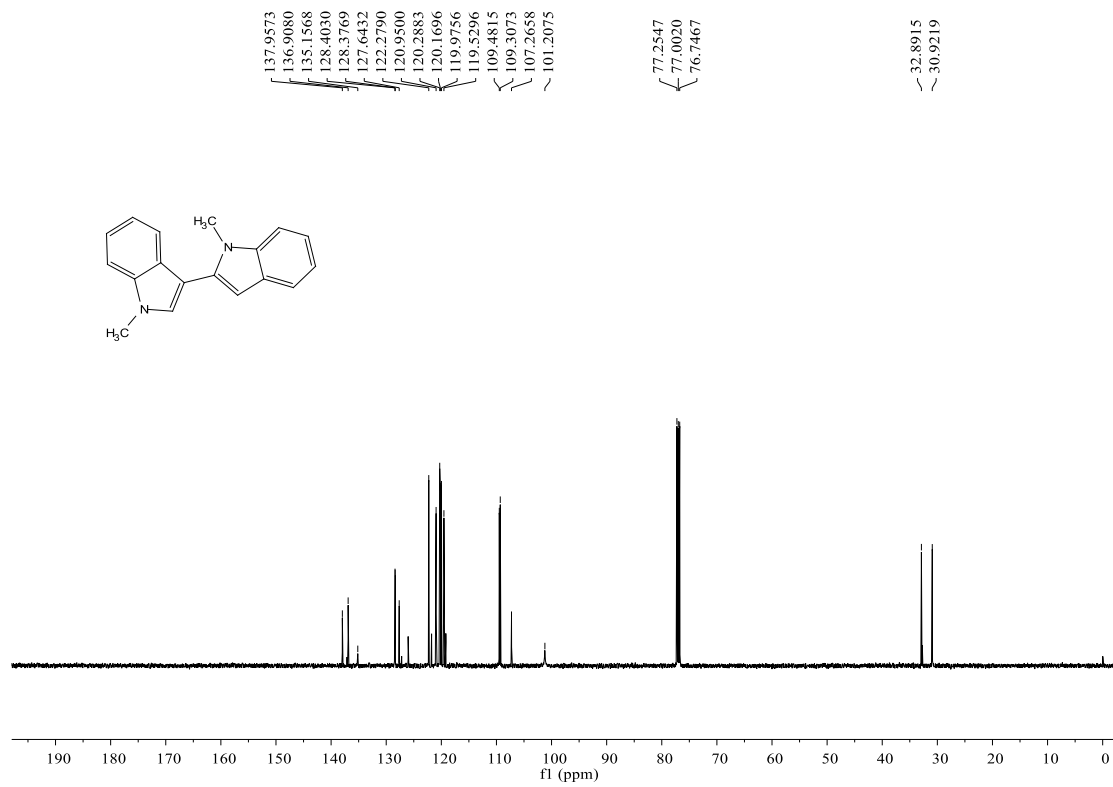

Supplement: d4qo00632a1.pdf [file d4qo00632a1.pdf]
